# Supplementary material for: Efficacy and Safety of a Krabbe Disease Gene Therapy
Source: PubMed Central journal article supplement (PMC9142772; doi:10.1089/hum.2021.245), 2022-05-16
Supplement: Supp_DataS1.pdf [file Supp_DataS1.pdf]

## CLINICAL PATHOLOGY – ABBREVIATIONS

| CBC & COAGULATION PANELS |                             | SERUM CHEMISTRY PANEL |                            | OTHER        |                                      |
|--------------------------|-----------------------------|-----------------------|----------------------------|--------------|--------------------------------------|
| Abbreviation             | Definition                  | Abbreviation          | Definition                 | Abbreviation | Definition                           |
| APTT                     | Activated PTT               | A/G                   | Albumin/Globulin Ratio     | AAV          | AAVhu68.CB7.CI.cGALCco.rBG           |
| HCT                      | Hematocrit                  | ALT                   | Alanine Aminotransferase   | CSF          | Cerebrospinal Fluid                  |
| HGB                      | Hemoglobin                  | AST                   | Aspartate Aminotransferase | F            | Female                               |
| MCH                      | Mean Corpuscular Hemoglobin | BUN                   | Blood Urea Nitrogen        | GC           | Genome Copies                        |
| MCHC                     | MCH Concentration           | CPK                   | Creatine Phosphokinase     | <i>GALC</i>  | Galactosylceramidase (gene, canine)  |
| MCV                      | Mean Corpuscular Volume     | K                     | Potassium                  | ID           | Identification Number                |
| PT                       | Prothrombin Time            | NA                    | Sodium                     | ITFFB        | Intrathecal Final Formulation Buffer |
| RBC                      | Red Blood Cell Count        |                       |                            | M            | Male                                 |
| WBC                      | White Blood Cell Count      |                       |                            | N/A          | Not Applicable                       |

Clinical Pathology - Blood: Hematology Page 2  
 Clinical Pathology - Blood: Serum Chemistry Page 9  
 Clinical Pathology - Blood: Coagulation Panel Page 20  
 Clinical Pathology - Cerebrospinal Fluid page 23

## CLINICAL PATHOLOGY – BLOOD: HEMATOLOGY

| Group                             |                        | 1                          |          | 2a/b                                                           |                   |          |          | 3         |
|-----------------------------------|------------------------|----------------------------|----------|----------------------------------------------------------------|-------------------|----------|----------|-----------|
| Treatment                         |                        | ITFFB                      |          | AAV                                                            |                   |          |          | ITFFB     |
| Dose                              |                        | N/A                        |          | 3.0 x 10 <sup>13</sup> GC<br>5.0 x 10 <sup>11</sup> GC/g Brain |                   |          |          | N/A       |
| GALC Mutation Status <sup>a</sup> |                        | Homozygous<br>(Krabbe Dog) |          | Homozygous<br>(Krabbe Dog)                                     |                   |          |          | Wild Type |
|                                   | Study Day <sup>b</sup> | K930 (F)                   | K948 (M) | K933 (M)                                                       | K937 (M)          | K938 (M) | K939 (F) | K928 (F)  |
| WBC (10 <sup>3</sup> /μL)         | 0                      | 7.4                        | 8.7      | 6.7                                                            | 6.8               | 7.0      | 5.4      | 11.2      |
|                                   | 14 (+/-1)              | 9.7                        | 11.6     | 12.2                                                           | 15.3              | 13.0     | 11.4     | 12.2      |
|                                   | 28 (+/-2)              | 5.0                        | 5.9      | 7.4                                                            | 5.5               | 6.5      | 5.5      | 5.6       |
|                                   | 70-98 (+/-3)           | N/A                        | 6.0      | 5.7                                                            | 10.9              | 11.0     | 13.4     | 5.3       |
|                                   | 120 (+/-3)             | N/A                        | N/A      | 7.0                                                            | 6.1               | 7.6      | 8.6      | 8.7       |
|                                   | 180 (+/-3)             | N/A                        | N/A      | 6.5                                                            | 6.7               | 6.6      | 9.9      | 7.2       |
|                                   | 9 months               | N/A                        | N/A      | 6.3                                                            | 17.9 <sup>c</sup> | N/A      | N/A      | 8.9       |
|                                   | 12 months              | N/A                        | N/A      | 7.9                                                            | N/A               | N/A      | N/A      | 5.7       |
|                                   | 18 months              | N/A                        | N/A      | 8.3                                                            | N/A               | N/A      | N/A      | 4.9       |
|                                   | 19 months              | N/A                        | N/A      | 7.9 <sup>c</sup>                                               | N/A               | N/A      | N/A      | 8.0       |
| RBC (10 <sup>6</sup> /μL)         | 0                      | 3.4                        | 3.3      | 3.6                                                            | 4.0               | 3.9      | 3.6      | 4.0       |
|                                   | 14 (+/-1)              | 5.0                        | 4.7      | 4.9                                                            | 4.1               | 4.4      | 3.8      | 5.0       |
|                                   | 28 (+/-2)              | 4.7                        | 4.5      | 4.4                                                            | 3.8               | 3.5      | 3.5      | 4.5       |
|                                   | 70-98 (+/-3)           | N/A                        | 5.7      | 5.1                                                            | 4.6               | 4.6      | 4.4      | 5.0       |
|                                   | 120 (+/-3)             | N/A                        | N/A      | 5.2                                                            | 5.1               | 5.4      | 4.9      | 5.4       |
|                                   | 180 (+/-3)             | N/A                        | N/A      | 5.7                                                            | 5.6               | 5.3      | 5.4      | 5.9       |
|                                   | 9 months               | N/A                        | N/A      | 6.3                                                            | 8.3 <sup>c</sup>  | N/A      | N/A      | 6.0       |
|                                   | 12 months              | N/A                        | N/A      | 10.7                                                           | N/A               | N/A      | N/A      | 6.2       |
|                                   | 18 months              | N/A                        | N/A      | 7.0                                                            | N/A               | N/A      | N/A      | 6.9       |
|                                   | 19 months              | N/A                        | N/A      | 9.1 <sup>c</sup>                                               | N/A               | N/A      | N/A      | 6.6       |
| HGB (g/dL)                        | 0                      | 7.8                        | 8.5      | 8.0                                                            | 10.1              | 10.4     | 9.7      | 8.9       |
|                                   | 14 (+/-1)              | 11.0                       | 10.7     | 9.8                                                            | 9.2               | 10.3     | 9.1      | 9.9       |

| Group                             |                        | 1                          |          | 2a/b                                                           |                 |          |          | 3         |
|-----------------------------------|------------------------|----------------------------|----------|----------------------------------------------------------------|-----------------|----------|----------|-----------|
| Treatment                         |                        | ITFFB                      |          | AAV                                                            |                 |          |          | ITFFB     |
| Dose                              |                        | N/A                        |          | 3.0 x 10 <sup>13</sup> GC<br>5.0 x 10 <sup>11</sup> GC/g Brain |                 |          |          | N/A       |
| GALC Mutation Status <sup>a</sup> |                        | Homozygous<br>(Krabbe Dog) |          | Homozygous<br>(Krabbe Dog)                                     |                 |          |          | Wild Type |
|                                   | Study Day <sup>b</sup> | K930 (F)                   | K948 (M) | K933 (M)                                                       | K937 (M)        | K938 (M) | K939 (F) | K928 (F)  |
|                                   | 28 (+/-2)              | 10.5                       | 9.9      | 9.3                                                            | 8.5             | 8.0      | 8.3      | 9.5       |
|                                   | 70-98 (+/-3)           | N/A                        | 12.5     | 10.6                                                           | 10.3            | 10.5     | 10.2     | 10.6      |
|                                   | 120 (+/-3)             | N/A                        | N/A      | 10.8                                                           | 11.2            | 12.2     | 11.4     | 11.7      |
|                                   | 180 (+/-3)             | N/A                        | N/A      | 12.0                                                           | 12.4            | 12.0     | 13.2     | 12.4      |
|                                   | 9 months               | N/A                        | N/A      | 14.1                                                           | 19 <sup>c</sup> | N/A      | N/A      | 13.5      |
|                                   | 12 months              | N/A                        | N/A      | 24.2                                                           | N/A             | N/A      | N/A      | 13.5      |
|                                   | 18 months              | N/A                        | N/A      | 15.2                                                           | N/A             | N/A      | N/A      | 15.0      |
|                                   | 19 months              | N/A                        | N/A      | 19.6 <sup>c</sup>                                              | N/A             | N/A      | N/A      | 14.8      |
|                                   | 0                      | 26                         | 29       | 28                                                             | 34              | 34       | 32       | 30        |
|                                   | 14 (+/-1)              | 36                         | 37       | 35                                                             | 32              | 35       | 31       | 35        |
|                                   | 28 (+/-2)              | 33                         | 33       | 30                                                             | 29              | 27       | 28       | 31        |
|                                   | 70-98 (+/-3)           | N/A                        | 40       | 35                                                             | 33              | 32       | 32       | 35        |
|                                   | 120 (+/-3)             | N/A                        | N/A      | 35                                                             | 37              | 39       | 36       | 37        |
|                                   | 180 (+/-3)             | N/A                        | N/A      | 39                                                             | 41              | 38       | 40       | 41        |
|                                   | 9 months               | N/A                        | N/A      | 43                                                             | 64 <sup>c</sup> | N/A      | N/A      | 43        |
|                                   | 12 months              | N/A                        | N/A      | 75                                                             | N/A             | N/A      | N/A      | 42        |
|                                   | 18 months              | N/A                        | N/A      | 50                                                             | N/A             | N/A      | N/A      | 49        |
|                                   | 19 months              | N/A                        | N/A      | 59 <sup>c</sup>                                                | N/A             | N/A      | N/A      | 44        |
|                                   | 0                      | 78                         | 86       | 78                                                             | 86              | 87       | 87       | 75        |
|                                   | 14 (+/-1)              | 71                         | 78       | 71                                                             | 78              | 80       | 81       | 70        |
|                                   | 28 (+/-2)              | 70                         | 73       | 68                                                             | 77              | 77       | 79       | 69        |

| Group                             |                        | 1                          |          | 2a/b                                                           |                   |          |          | 3         |
|-----------------------------------|------------------------|----------------------------|----------|----------------------------------------------------------------|-------------------|----------|----------|-----------|
| Treatment                         |                        | ITFFB                      |          | AAV                                                            |                   |          |          | ITFFB     |
| Dose                              |                        | N/A                        |          | 3.0 x 10 <sup>13</sup> GC<br>5.0 x 10 <sup>11</sup> GC/g Brain |                   |          |          | N/A       |
| GALC Mutation Status <sup>a</sup> |                        | Homozygous<br>(Krabbe Dog) |          | Homozygous<br>(Krabbe Dog)                                     |                   |          |          | Wild Type |
|                                   | Study Day <sup>b</sup> | K930 (F)                   | K948 (M) | K933 (M)                                                       | K937 (M)          | K938 (M) | K939 (F) | K928 (F)  |
|                                   | 70-98 (+/-3)           | N/A                        | 70       | 68                                                             | 70                | 70       | 72       | 71        |
|                                   | 120 (+/-3)             | N/A                        | N/A      | 67                                                             | 73                | 73       | 73       | 69        |
|                                   | 180 (+/-3)             | N/A                        | N/A      | 68                                                             | 73                | 72       | 76       | 69        |
|                                   | 9 months               | N/A                        | N/A      | 68                                                             | 77 <sup>c</sup>   | N/A      | N/A      | 72        |
|                                   | 12 months              | N/A                        | N/A      | 70                                                             | N/A               | N/A      | N/A      | 68        |
|                                   | 18 months              | N/A                        | N/A      | 71                                                             | N/A               | N/A      | N/A      | 71        |
|                                   | 19 months              | N/A                        | N/A      | 64 <sup>c</sup>                                                | N/A               | N/A      | N/A      | 68        |
|                                   |                        |                            |          |                                                                |                   |          |          |           |
| <b>MCH (pg)</b>                   | 0                      | 23.3                       | 25.4     | 22.5                                                           | 25.4              | 26.6     | 26.8     | 22.5      |
|                                   | 14 (+/-1)              | 20.7                       | 22.7     | 20.2                                                           | 22.6              | 23.5     | 24.0     | 19.7      |
|                                   | 28 (+/-2)              | 22.2                       | 21.8     | 21.3                                                           | 22.4              | 22.9     | 23.4     | 21.0      |
|                                   | 70-98 (+/-3)           | N/A                        | 22.0     | 20.7                                                           | 22.2              | 22.9     | 23.1     | 21.3      |
|                                   | 120 (+/-3)             | N/A                        | N/A      | 20.9                                                           | 22.3              | 22.8     | 23.2     | 21.7      |
|                                   | 180 (+/-3)             | N/A                        | N/A      | 20.8                                                           | 22.2              | 22.7     | 24.7     | 21.2      |
|                                   | 9 months               | N/A                        | N/A      | 22.3                                                           | 22.9 <sup>c</sup> | N/A      | N/A      | 22.4      |
|                                   | 12 months              | N/A                        | N/A      | 22.6                                                           | N/A               | N/A      | N/A      | 22.0      |
|                                   | 18 months              | N/A                        | N/A      | 21.6                                                           | N/A               | N/A      | N/A      | 21.7      |
|                                   | 19 months              | N/A                        | N/A      | 21.5 <sup>c</sup>                                              | N/A               | N/A      | N/A      | 22.5      |
|                                   |                        |                            |          |                                                                |                   |          |          |           |
| <b>MCHC (g/dL)</b>                | 0                      | 30                         | 30       | 29                                                             | 29                | 30       | 31       | 30        |
|                                   | 14 (+/-1)              | 31                         | 29       | 28                                                             | 29                | 29       | 29       | 28        |
|                                   | 28 (+/-2)              | 32                         | 30       | 31                                                             | 29                | 30       | 30       | 31        |
|                                   | 70-98 (+/-3)           | N/A                        | 31       | 30                                                             | 32                | 33       | 32       | 30        |

| Group                             |                        | 1                          |          | 2a/b                                                           |                  |          |          | 3         |
|-----------------------------------|------------------------|----------------------------|----------|----------------------------------------------------------------|------------------|----------|----------|-----------|
| Treatment                         |                        | ITFFB                      |          | AAV                                                            |                  |          |          | ITFFB     |
| Dose                              |                        | N/A                        |          | 3.0 x 10 <sup>13</sup> GC<br>5.0 x 10 <sup>11</sup> GC/g Brain |                  |          |          | N/A       |
| GALC Mutation Status <sup>a</sup> |                        | Homozygous<br>(Krabbe Dog) |          | Homozygous<br>(Krabbe Dog)                                     |                  |          |          | Wild Type |
|                                   | Study Day <sup>b</sup> | K930 (F)                   | K948 (M) | K933 (M)                                                       | K937 (M)         | K938 (M) | K939 (F) | K928 (F)  |
|                                   | 120 (+/-3)             | N/A                        | N/A      | 31                                                             | 31               | 31       | 32       | 32        |
|                                   | 180 (+/-3)             | N/A                        | N/A      | 31                                                             | 30               | 32       | 33       | 31        |
|                                   | 9 months               | N/A                        | N/A      | 33                                                             | 30 <sup>c</sup>  | N/A      | N/A      | 31        |
|                                   | 12 months              | N/A                        | N/A      | 32                                                             | N/A              | N/A      | N/A      | 32        |
|                                   | 18 months              | N/A                        | N/A      | 31                                                             | N/A              | N/A      | N/A      | 31        |
|                                   | 19 months              | N/A                        | N/A      | 33 <sup>c</sup>                                                | N/A              | N/A      | N/A      | 33        |
|                                   |                        |                            |          |                                                                |                  |          |          |           |
| Platelets (10 <sup>3</sup> /μL)   | 0                      | 243                        | 331      | 247                                                            | 412              | 423      | 505      | 324       |
|                                   | 14 (+/-1)              | 572                        | 462      | 644                                                            | 443              | 521      | 418      | 509       |
|                                   | 28 (+/-2)              | 323                        | 249      | 362                                                            | 261              | 285      | 425      | 226       |
|                                   | 70-98 (+/-3)           | N/A                        | 379      | 400                                                            | 331              | 386      | 542      | 333       |
|                                   | 120 (+/-3)             | N/A                        | N/A      | 356                                                            | 369              | 352      | 404      | 210       |
|                                   | 180 (+/-3)             | N/A                        | N/A      | 240                                                            | 222              | 261      | 305      | 106       |
|                                   | 9 months               | N/A                        | N/A      | 232                                                            | 180 <sup>c</sup> | N/A      | N/A      | 255       |
|                                   | 12 months              | N/A                        | N/A      | 415                                                            | N/A              | N/A      | N/A      | 199       |
|                                   | 18 months              | N/A                        | N/A      | 189                                                            | N/A              | N/A      | N/A      | 227       |
|                                   | 19 months              | N/A                        | N/A      | 300 <sup>c</sup>                                               | N/A              | N/A      | N/A      | 132       |
|                                   |                        |                            |          |                                                                |                  |          |          |           |
| Neutrophils (/μL)                 | 0                      | 5328                       | 6177     | 3752                                                           | 3876             | 4130     | 3078     | 6048      |
|                                   | 14 (+/-1)              | 5732                       | 7076     | 7076                                                           | 9027             | 6760     | 5814     | 7930      |
|                                   | 28 (+/-2)              | 3250                       | 3422     | 4514                                                           | 2970             | 2990     | 3410     | 3080      |
|                                   | 70-98 (+/-3)           | N/A                        | 3660     | 4047                                                           | 7739             | 6710     | 8844     | 2597      |
|                                   | 120 (+/-3)             | N/A                        | N/A      | 4620                                                           | 3416             | 4028     | 4730     | 5394      |

| Group                             |                        | 1                          |                   | 2a/b                                                           |                    |          |          | 3         |
|-----------------------------------|------------------------|----------------------------|-------------------|----------------------------------------------------------------|--------------------|----------|----------|-----------|
| Treatment                         |                        | ITFFB                      |                   | AAV                                                            |                    |          |          | ITFFB     |
| Dose                              |                        | N/A                        |                   | 3.0 x 10 <sup>13</sup> GC<br>5.0 x 10 <sup>11</sup> GC/g Brain |                    |          |          | N/A       |
| GALC Mutation Status <sup>a</sup> |                        | Homozygous<br>(Krabbe Dog) |                   | Homozygous<br>(Krabbe Dog)                                     |                    |          |          | Wild Type |
|                                   | Study Day <sup>b</sup> | K930 (F)                   | K948 (M)          | K933 (M)                                                       | K937 (M)           | K938 (M) | K939 (F) | K928 (F)  |
|                                   | 180 (+/-3)             | N/A                        | N/A               | 3900                                                           | 4355               | 3300     | 6336     | 3888      |
|                                   | 9 months               | N/A                        | N/A               | 4284                                                           | 16647 <sup>c</sup> | N/A      | N/A      | 6675      |
|                                   | 12 months              | N/A                        | N/A               | 4977                                                           | N/A                | N/A      | N/A      | 3477      |
|                                   | 18 months              | N/A                        | N/A               | 6640                                                           | N/A                | N/A      | N/A      | 3626      |
|                                   | 19 months              | N/A                        | N/A               | 6004 <sup>c</sup>                                              | N/A                | N/A      | N/A      | 5120      |
|                                   |                        |                            |                   |                                                                |                    |          |          |           |
| <b>Lymphocytes (/μL)</b>          | 0                      | 1776                       | 2088              | 2613                                                           | 2244               | 2310     | 1782     | 4368      |
|                                   | 14 (+/-1)              | 3783                       | 3712              | 3660                                                           | 5355               | 5590     | 4674     | 3782      |
|                                   | 28 (+/-2)              | 1350                       | 1888              | 2220                                                           | 1980               | 2665     | 1650     | 2016      |
|                                   | 70-98 (+/-3)           | N/A                        | 1860              | 1083                                                           | 2398               | 3410     | 3618     | 2067      |
|                                   | 120 (+/-3)             | N/A                        | N/A               | 1680                                                           | 2196               | 3116     | 2838     | 2523      |
|                                   | 180 (+/-3)             | N/A                        | N/A               | 1950                                                           | 1809               | 2970     | 2673     | 1728      |
|                                   | 9 months               | N/A                        | N/A               | 1323                                                           | 537 <sup>c</sup>   | N/A      | N/A      | 1246      |
|                                   | 12 months              | N/A                        | N/A               | 2449                                                           | N/A                | N/A      | N/A      | 1254      |
|                                   | 18 months              | N/A                        | N/A               | 913                                                            | N/A                | N/A      | N/A      | 784       |
| 19 months                         | N/A                    | N/A                        | 1264 <sup>c</sup> | N/A                                                            | N/A                | N/A      | 1440     |           |
|                                   |                        |                            |                   |                                                                |                    |          |          |           |
| <b>Monocytes (/μL)</b>            | 0                      | 148                        | 348               | 134                                                            | 476                | 280      | 324      | 672       |
|                                   | 14 (+/-1)              | 388                        | 696               | 732                                                            | 765                | 650      | 684      | 244       |
|                                   | 28 (+/-2)              | 350                        | 354               | 518                                                            | 385                | 585      | 220      | 392       |
|                                   | 70-98 (+/-3)           | N/A                        | 420               | 399                                                            | 654                | 770      | 804      | 318       |
|                                   | 120 (+/-3)             | N/A                        | N/A               | 630                                                            | 366                | 380      | 430      | 522       |
|                                   | 180 (+/-3)             | N/A                        | N/A               | 390                                                            | 335                | 264      | 495      | 792       |
|                                   | 9 months               | N/A                        | N/A               | 441                                                            | 716 <sup>c</sup>   | N/A      | N/A      | 445       |

| Group                             |                        | 1                          |          | 2a/b                                                           |                |          |          | 3         |
|-----------------------------------|------------------------|----------------------------|----------|----------------------------------------------------------------|----------------|----------|----------|-----------|
| Treatment                         |                        | ITFFB                      |          | AAV                                                            |                |          |          | ITFFB     |
| Dose                              |                        | N/A                        |          | 3.0 x 10 <sup>13</sup> GC<br>5.0 x 10 <sup>11</sup> GC/g Brain |                |          |          | N/A       |
| GALC Mutation Status <sup>a</sup> |                        | Homozygous<br>(Krabbe Dog) |          | Homozygous<br>(Krabbe Dog)                                     |                |          |          | Wild Type |
|                                   | Study Day <sup>b</sup> | K930 (F)                   | K948 (M) | K933 (M)                                                       | K937 (M)       | K938 (M) | K939 (F) | K928 (F)  |
|                                   | 12 months              | N/A                        | N/A      | 316                                                            | N/A            | N/A      | N/A      | 171       |
|                                   | 18 months              | N/A                        | N/A      | 581                                                            | N/A            | N/A      | N/A      | 196       |
|                                   | 19 months              | N/A                        | N/A      | 553 <sup>c</sup>                                               | N/A            | N/A      | N/A      | 480       |
| <b>Eosinophils ( /μL)</b>         |                        |                            |          |                                                                |                |          |          |           |
|                                   | 0                      | 148                        | 87       | 134                                                            | 204            | 280      | 216      | 112       |
|                                   | 14 (+/-1)              | 97                         | 116      | 732                                                            | 153            | 0        | 228      | 244       |
|                                   | 28 (+/-2)              | 50                         | 236      | 148                                                            | 165            | 260      | 110      | 112       |
|                                   | 70-98 (+/-3)           | N/A                        | 60       | 171                                                            | 109            | 110      | 134      | 318       |
|                                   | 120 (+/-3)             | N/A                        | N/A      | 70                                                             | 122            | 76       | 602      | 261       |
|                                   | 180 (+/-3)             | N/A                        | N/A      | 260                                                            | 201            | 66       | 396      | 792       |
|                                   | 9 months               | N/A                        | N/A      | 252                                                            | 0 <sup>c</sup> | N/A      | N/A      | 534       |
|                                   | 12 months              | N/A                        | N/A      | 158                                                            | N/A            | N/A      | N/A      | 798       |
|                                   | 18 months              | N/A                        | N/A      | 166                                                            | N/A            | N/A      | N/A      | 294       |
|                                   | 19 months              | N/A                        | N/A      | 79 <sup>c</sup>                                                | N/A            | N/A      | N/A      | 960       |
| <b>Basophils ( /μL)</b>           |                        |                            |          |                                                                |                |          |          |           |
|                                   | 0                      | 0                          | 0        | 67                                                             | 0              | 0        | 0        | 0         |
|                                   | 14 (+/-1)              | 0                          | 0        | 0                                                              | 0              | 0        | 0        | 0         |
|                                   | 28 (+/-2)              | 0                          | 0        | 0                                                              | 0              | 0        | 110      | 0         |
|                                   | 70-98 (+/-3)           | N/A                        | 0        | 0                                                              | 0              | 0        | 0        | 0         |
|                                   | 120 (+/-3)             | N/A                        | N/A      | 0                                                              | 0              | 0        | 0        | 0         |
|                                   | 180 (+/-3)             | N/A                        | N/A      | 0                                                              | 0              | 0        | 0        | 0         |
|                                   | 9 months               | N/A                        | N/A      | 0                                                              | 0 <sup>c</sup> | N/A      | N/A      | 0         |
|                                   | 12 months              | N/A                        | N/A      | 0                                                              | N/A            | N/A      | N/A      | 0         |

| Group                             |                        | 1                          |          | 2a/b                                                           |          |          |          | 3         |
|-----------------------------------|------------------------|----------------------------|----------|----------------------------------------------------------------|----------|----------|----------|-----------|
| Treatment                         |                        | ITFFB                      |          | AAV                                                            |          |          |          | ITFFB     |
| Dose                              |                        | N/A                        |          | 3.0 x 10 <sup>13</sup> GC<br>5.0 x 10 <sup>11</sup> GC/g Brain |          |          |          | N/A       |
| GALC Mutation Status <sup>a</sup> |                        | Homozygous<br>(Krabbe Dog) |          | Homozygous<br>(Krabbe Dog)                                     |          |          |          | Wild Type |
|                                   | Study Day <sup>b</sup> | K930 (F)                   | K948 (M) | K933 (M)                                                       | K937 (M) | K938 (M) | K939 (F) | K928 (F)  |
|                                   | 18 months              | N/A                        | N/A      | 0                                                              | N/A      | N/A      | N/A      | 0         |
|                                   | 19 months              | N/A                        | N/A      | 0 <sup>c</sup>                                                 | N/A      | N/A      | N/A      | 0         |

K933, K928 D70 collected late on D98 instead of D70

K948 D70 collected on D66, unscheduled necropsy

<sup>a</sup>Mutation status refers to the canine *GALC* A.C 473 (Y158S) loss-of-function mutation. Animals homozygous for the *GALC* loss-of-function mutation exhibit phenotypes similar to that of human Krabbe disease and are referred to as Krabbe dogs.

<sup>b</sup> Study day is defined as days/weeks post treatment.

<sup>c</sup> Unscheduled terminal bleed.



### CLINICAL PATHOLOGY – BLOOD: SERUM CHEMISTRY

| Group                             |                        | 1                          |          | 2a/b                                                           |                  |          |          | 3         |
|-----------------------------------|------------------------|----------------------------|----------|----------------------------------------------------------------|------------------|----------|----------|-----------|
| Treatment                         |                        | ITFFB                      |          | AAV                                                            |                  |          |          | ITFFB     |
| Dose                              |                        | N/A                        |          | 3.0 x 10 <sup>13</sup> GC<br>5.0 x 10 <sup>11</sup> GC/g Brain |                  |          |          | N/A       |
| GALC Mutation Status <sup>a</sup> |                        | Homozygous<br>(Krabbe Dog) |          | Homozygous<br>(Krabbe Dog)                                     |                  |          |          | Wild Type |
|                                   | Study Day <sup>b</sup> | K930 (F)                   | K948 (M) | K933 (M)                                                       | K937 (M)         | K938 (M) | K939 (F) | K928 (F)  |
| <b>Total Protein (g/dL)</b>       | 0                      | 4.0                        | 4.2      | 4.0                                                            | 3.5              | 3.7      | 3.6      | 4.3       |
|                                   | 14 (+/-1)              | 4.9                        | 5.0      | 4.5                                                            | 4.0              | 3.9      | 4.7      | 4.3       |
|                                   | 28 (+/-2)              | 4.0                        | 4.3      | 4.3                                                            | 4.0              | 4.3      | 4.3      | 3.4       |
|                                   | 70-98 (+/-3)           | N/A                        | 4.8      | 4.8                                                            | 4.5              | 4.5      | 4.3      | 4.2       |
|                                   | 120 (+/-3)             | N/A                        | N/A      | 4.8                                                            | 4.9              | 4.8      | 4.4      | 4.5       |
|                                   | 180 (+/-3)             | N/A                        | N/A      | 4.7                                                            | 5.1              | 5.0      | 4.8      | 4.6       |
|                                   | 9 months               | N/A                        | N/A      | 5.2                                                            | 7.1 <sup>c</sup> | N/A      | N/A      | 4.9       |
|                                   | 12 months              | N/A                        | N/A      | 5.7                                                            | N/A              | N/A      | N/A      | 5.2       |
|                                   | 18 months              | N/A                        | N/A      | 6.4                                                            | N/A              | N/A      | N/A      | 5.9       |
|                                   | 19 months              | N/A                        | N/A      | 7 <sup>c</sup>                                                 | N/A              | N/A      | N/A      | 5.5       |
| <b>Albumin (g/dL)</b>             | 0                      | 2.6                        | 2.7      | 2.5                                                            | 2.5              | 2.4      | 2.3      | 2.9       |
|                                   | 14 (+/-1)              | 3.2                        | 3.8      | 3.1                                                            | 2.3              | 2.7      | 3.0      | 2.9       |
|                                   | 28 (+/-2)              | 2.8                        | 3.0      | 2.9                                                            | 2.4              | 2.9      | 2.8      | 2.6       |
|                                   | 70-98 (+/-3)           | N/A                        | 3.3      | 2.9                                                            | 3.0              | 3.0      | 2.9      | 2.8       |
|                                   | 120 (+/-3)             | N/A                        | N/A      | 3.0                                                            | 3.0              | 3.0      | 2.9      | 2.9       |
|                                   | 180 (+/-3)             | N/A                        | N/A      | 2.9                                                            | 3.0              | 3.0      | 2.8      | 2.9       |
|                                   | 9 months               | N/A                        | N/A      | 3.0                                                            | 3.9 <sup>c</sup> | N/A      | N/A      | 2.8       |
|                                   | 12 months              | N/A                        | N/A      | 3.2                                                            | N/A              | N/A      | N/A      | 3.3       |
|                                   | 18 months              | N/A                        | N/A      | 3.4                                                            | N/A              | N/A      | N/A      | 3.5       |
|                                   | 19 months              | N/A                        | N/A      | 3.8 <sup>c</sup>                                               | N/A              | N/A      | N/A      | 3.2       |
| <b>Globulin (g/dL)</b>            | 0                      | 1.4                        | 1.5      | 1.5                                                            | 1.0              | 1.3      | 1.3      | 1.4       |
|                                   | 14 (+/-1)              | 1.7                        | 1.2      | 1.4                                                            | 1.7              | 1.2      | 1.7      | 1.4       |

| Group                             |                        | 1                          |          | 2a/b                                                           |                   |          |          | 3         |
|-----------------------------------|------------------------|----------------------------|----------|----------------------------------------------------------------|-------------------|----------|----------|-----------|
| Treatment                         |                        | ITFFB                      |          | AAV                                                            |                   |          |          | ITFFB     |
| Dose                              |                        | N/A                        |          | 3.0 x 10 <sup>13</sup> GC<br>5.0 x 10 <sup>11</sup> GC/g Brain |                   |          |          | N/A       |
| GALC Mutation Status <sup>a</sup> |                        | Homozygous<br>(Krabbe Dog) |          | Homozygous<br>(Krabbe Dog)                                     |                   |          |          | Wild Type |
|                                   | Study Day <sup>b</sup> | K930 (F)                   | K948 (M) | K933 (M)                                                       | K937 (M)          | K938 (M) | K939 (F) | K928 (F)  |
|                                   | 28 (+/-2)              | 1.2                        | 1.3      | 1.4                                                            | 1.6               | 1.4      | 1.5      | 0.8       |
|                                   | 70-98 (+/-3)           | N/A                        | 1.5      | 1.9                                                            | 1.5               | 1.5      | 1.4      | 1.4       |
|                                   | 120 (+/-3)             | N/A                        | N/A      | 1.8                                                            | 1.9               | 1.8      | 1.5      | 1.6       |
|                                   | 180 (+/-3)             | N/A                        | N/A      | 1.8                                                            | 2.1               | 2.0      | 2.0      | 1.7       |
|                                   | 9 months               | N/A                        | N/A      | 2.2                                                            | 3.2 <sup>c</sup>  | N/A      | N/A      | 2.1       |
|                                   | 12 months              | N/A                        | N/A      | 2.5                                                            | N/A               | N/A      | N/A      | 1.9       |
|                                   | 18 months              | N/A                        | N/A      | 3                                                              | N/A               | N/A      | N/A      | 2.4       |
|                                   | 19 months              | N/A                        | N/A      | 3.2 <sup>c</sup>                                               | N/A               | N/A      | N/A      | 2.3       |
|                                   | 0                      | 1.9                        | 1.8      | 1.7                                                            | 2.5               | 1.8      | 1.8      | 2.1       |
|                                   | 14 (+/-1)              | 1.9                        | 3.2      | 2.2                                                            | 1.4               | 2.3      | 1.8      | 2.1       |
|                                   | 28 (+/-2)              | 2.3                        | 2.3      | 2.1                                                            | 1.5               | 2.1      | 1.9      | 3.3       |
|                                   | 70-98 (+/-3)           | N/A                        | 2.2      | 1.5                                                            | 2.0               | 2.0      | 2.1      | 2.0       |
|                                   | 120 (+/-3)             | N/A                        | N/A      | 1.7                                                            | 1.6               | 1.7      | 1.9      | 1.8       |
|                                   | 180 (+/-3)             | N/A                        | N/A      | 1.6                                                            | 1.4               | 1.5      | 1.4      | 1.7       |
|                                   | 9 months               | N/A                        | N/A      | 1.4                                                            | 1.22 <sup>c</sup> | N/A      | N/A      | 1.3       |
|                                   | 12 months              | N/A                        | N/A      | 1.3                                                            | N/A               | N/A      | N/A      | 1.7       |
|                                   | 18 months              | N/A                        | N/A      | 1.1                                                            | N/A               | N/A      | N/A      | 1.5       |
|                                   | 19 months              | N/A                        | N/A      | 1.2 <sup>c</sup>                                               | N/A               | N/A      | N/A      | 1.4       |
|                                   | 0                      | 17                         | 16       | 15                                                             | 16                | 13       | 12       | 24        |
|                                   | 14 (+/-1)              | 16                         | 20       | 20                                                             | 13                | 17       | 15       | 24        |
|                                   | 28 (+/-2)              | 21                         | 27       | 25                                                             | 17                | 17       | 15       | 23        |

| Group                             |                        | 1                          |          | 2a/b                                                           |                  |          |          | 3         |
|-----------------------------------|------------------------|----------------------------|----------|----------------------------------------------------------------|------------------|----------|----------|-----------|
| Treatment                         |                        | ITFFB                      |          | AAV                                                            |                  |          |          | ITFFB     |
| Dose                              |                        | N/A                        |          | 3.0 x 10 <sup>13</sup> GC<br>5.0 x 10 <sup>11</sup> GC/g Brain |                  |          |          | N/A       |
| GALC Mutation Status <sup>a</sup> |                        | Homozygous<br>(Krabbe Dog) |          | Homozygous<br>(Krabbe Dog)                                     |                  |          |          | Wild Type |
|                                   | Study Day <sup>b</sup> | K930 (F)                   | K948 (M) | K933 (M)                                                       | K937 (M)         | K938 (M) | K939 (F) | K928 (F)  |
|                                   | 70-98 (+/-3)           | N/A                        | 18       | 29                                                             | 19               | 22       | 20       | 27        |
|                                   | 120 (+/-3)             | N/A                        | N/A      | 25                                                             | 25               | 26       | 22       | 26        |
|                                   | 180 (+/-3)             | N/A                        | N/A      | 26                                                             | 17               | 18       | 19       | 28        |
|                                   | 9 months               | N/A                        | N/A      | 31                                                             | 184 <sup>c</sup> | N/A      | N/A      | 44        |
|                                   | 12 months              | N/A                        | N/A      | 27                                                             | N/A              | N/A      | N/A      | 31        |
|                                   | 18 months              | N/A                        | N/A      | 24                                                             | N/A              | N/A      | N/A      | 33        |
|                                   | 19 months              | N/A                        | N/A      | 55 <sup>c</sup>                                                | N/A              | N/A      | N/A      | 32        |
|                                   |                        |                            |          |                                                                |                  |          |          |           |
| ALT (IU/L)                        | 0                      | 8                          | 6        | 5                                                              | 6                | 7        | 8        | 7         |
|                                   | 14 (+/-1)              | 20                         | 15       | 13                                                             | 10               | 12       | 8        | 19        |
|                                   | 28 (+/-2)              | 20                         | 36       | 30                                                             | 19               | 26       | 21       | 21        |
|                                   | 70-98 (+/-3)           | N/A                        | 18       | 20                                                             | 20               | 28       | 25       | 16        |
|                                   | 120 (+/-3)             | N/A                        | N/A      | 18                                                             | 23               | 28       | 25       | 16        |
|                                   | 180 (+/-3)             | N/A                        | N/A      | 16                                                             | 18               | 30       | 23       | 16        |
|                                   | 9 months               | N/A                        | N/A      | 25                                                             | 48 <sup>c</sup>  | N/A      | N/A      | 24        |
|                                   | 12 months              | N/A                        | N/A      | 23                                                             | N/A              | N/A      | N/A      | 23        |
|                                   | 18 months              | N/A                        | N/A      | 17                                                             | N/A              | N/A      | N/A      | 26        |
|                                   | 19 months              | N/A                        | N/A      | 30 <sup>c</sup>                                                | N/A              | N/A      | N/A      | 22        |
|                                   |                        |                            |          |                                                                |                  |          |          |           |
| Alk P (IU/L)                      | 0                      | 134                        | 172      | 131                                                            | 242              | 216      | 302      | 170       |
|                                   | 14 (+/-1)              | 135                        | 263      | 143                                                            | 175              | 143      | 202      | 160       |
|                                   | 28 (+/-2)              | 119                        | 245      | 128                                                            | 103              | 88       | 216      | 132       |
|                                   | 70-98 (+/-3)           | N/A                        | 162      | 167                                                            | 121              | 101      | 157      | 137       |

| Group                              |                        | 1                          |          | 2a/b                                                           |                  |          |          | 3         |
|------------------------------------|------------------------|----------------------------|----------|----------------------------------------------------------------|------------------|----------|----------|-----------|
| Treatment                          |                        | ITFFB                      |          | AAV                                                            |                  |          |          | ITFFB     |
| Dose                               |                        | N/A                        |          | 3.0 x 10 <sup>13</sup> GC<br>5.0 x 10 <sup>11</sup> GC/g Brain |                  |          |          | N/A       |
| GALC Mutation Status <sup>a</sup>  |                        | Homozygous<br>(Krabbe Dog) |          | Homozygous<br>(Krabbe Dog)                                     |                  |          |          | Wild Type |
|                                    | Study Day <sup>b</sup> | K930 (F)                   | K948 (M) | K933 (M)                                                       | K937 (M)         | K938 (M) | K939 (F) | K928 (F)  |
|                                    | 120 (+/-3)             | N/A                        | N/A      | 118                                                            | 126              | 108      | 130      | 97        |
|                                    | 180 (+/-3)             | N/A                        | N/A      | 103                                                            | 81               | 82       | 84       | 76        |
|                                    | 9 months               | N/A                        | N/A      | 78                                                             | 140 <sup>c</sup> | N/A      | N/A      | 37        |
|                                    | 12 months              | N/A                        | N/A      | 55                                                             | N/A              | N/A      | N/A      | 26        |
|                                    | 18 months              | N/A                        | N/A      | 49                                                             | N/A              | N/A      | N/A      | 25        |
|                                    | 19 months              | N/A                        | N/A      | 26 <sup>c</sup>                                                | N/A              | N/A      | N/A      | 25        |
|                                    |                        |                            |          |                                                                |                  |          |          |           |
| <b>Total Bilirubin<br/>(mg/dL)</b> | 0                      | 0.1                        | 0.1      | 0.1                                                            | 0.1              | 0.1      | 0.1      | 0.1       |
|                                    | 14 (+/-1)              | 0.1                        | 0.1      | 0.1                                                            | 0.1              | 0.1      | 0.1      | 0.2       |
|                                    | 28 (+/-2)              | 0.1                        | 0.1      | 0.1                                                            | 0.1              | 0.1      | 0.2      | 0.1       |
|                                    | 70-98 (+/-3)           | N/A                        | 0.1      | 0.1                                                            | 0.5              | 0.4      | 0.3      | 0.2       |
|                                    | 120 (+/-3)             | N/A                        | N/A      | 0.1                                                            | 0.3              | 0.2      | 0.1      | 0.1       |
|                                    | 180 (+/-3)             | N/A                        | N/A      | 0.1                                                            | 0.2              | 0.4      | 0.2      | 0.2       |
|                                    | 9 months               | N/A                        | N/A      | 0.1                                                            | 0.4 <sup>c</sup> | N/A      | N/A      | 0.2       |
|                                    | 12 months              | N/A                        | N/A      | 0.1                                                            | N/A              | N/A      | N/A      | 0.2       |
|                                    | 18 months              | N/A                        | N/A      | 0.2                                                            | N/A              | N/A      | N/A      | 0.2       |
|                                    | 19 months              | N/A                        | N/A      | 0.1 <sup>c</sup>                                               | N/A              | N/A      | N/A      | 0.2       |
|                                    |                        |                            |          |                                                                |                  |          |          |           |
| <b>BUN (mg/dL)</b>                 | 0                      | 10                         | 21       | 11                                                             | 19               | 16       | 10       | 22        |
|                                    | 14 (+/-1)              | 19                         | 11       | 13                                                             | 8                | 9        | 10       | 13        |
|                                    | 28 (+/-2)              | 15                         | 11       | 16                                                             | 13               | 16       | 9        | 16        |
|                                    | 70-98 (+/-3)           | N/A                        | 9        | 18                                                             | 14               | 18       | 15       | 22        |
|                                    | 120 (+/-3)             | N/A                        | N/A      | 15                                                             | 13               | 13       | 10       | 15        |

| Group                             |                        | 1                          |          | 2a/b                                                           |                   |          |          | 3         |
|-----------------------------------|------------------------|----------------------------|----------|----------------------------------------------------------------|-------------------|----------|----------|-----------|
| Treatment                         |                        | ITFFB                      |          | AAV                                                            |                   |          |          | ITFFB     |
| Dose                              |                        | N/A                        |          | 3.0 x 10 <sup>13</sup> GC<br>5.0 x 10 <sup>11</sup> GC/g Brain |                   |          |          | N/A       |
| GALC Mutation Status <sup>a</sup> |                        | Homozygous<br>(Krabbe Dog) |          | Homozygous<br>(Krabbe Dog)                                     |                   |          |          | Wild Type |
|                                   | Study Day <sup>b</sup> | K930 (F)                   | K948 (M) | K933 (M)                                                       | K937 (M)          | K938 (M) | K939 (F) | K928 (F)  |
|                                   | 180 (+/-3)             | N/A                        | N/A      | 23                                                             | 14                | 19       | 14       | 17        |
|                                   | 9 months               | N/A                        | N/A      | 18                                                             | 37 <sup>c</sup>   | N/A      | N/A      | 19        |
|                                   | 12 months              | N/A                        | N/A      | 36                                                             | N/A               | N/A      | N/A      | 20        |
|                                   | 18 months              | N/A                        | N/A      | 20                                                             | N/A               | N/A      | N/A      | 23        |
|                                   | 19 months              | N/A                        | N/A      | 31 <sup>c</sup>                                                | N/A               | N/A      | N/A      | 27        |
| <b>Creininine (mg/dL)</b>         |                        |                            |          |                                                                |                   |          |          |           |
|                                   | 0                      | 0.2                        | 0.2      | 0.2                                                            | 0.2               | 0.3      | 0.2      | 0.2       |
|                                   | 14 (+/-1)              | 0.8                        | 0.2      | 0.9                                                            | 0.5               | 0.4      | 0.2      | 0.8       |
|                                   | 28 (+/-2)              | 0.8                        | 0.4      | 0.7                                                            | 0.4               | 0.6      | 0.2      | 0.6       |
|                                   | 70-98 (+/-3)           | N/A                        | 0.3      | 0.6                                                            | 0.5               | 0.7      | 0.5      | 0.7       |
|                                   | 120 (+/-3)             | N/A                        | N/A      | 0.7                                                            | 0.5               | 0.6      | 0.4      | 0.7       |
|                                   | 180 (+/-3)             | N/A                        | N/A      | 0.8                                                            | 0.7               | 0.8      | 0.5      | 0.9       |
|                                   | 9 months               | N/A                        | N/A      | 0.8                                                            | 1.6 <sup>c</sup>  | N/A      | N/A      | 1.0       |
|                                   | 12 months              | N/A                        | N/A      | 1.1                                                            | N/A               | N/A      | N/A      | 0.9       |
|                                   | 18 months              | N/A                        | N/A      | 1                                                              | N/A               | N/A      | N/A      | 1.1       |
|                                   | 19 months              | N/A                        | N/A      | 0.9 <sup>c</sup>                                               | N/A               | N/A      | N/A      | 1.1       |
| <b>BUN/Creatinine Ratio</b>       |                        |                            |          |                                                                |                   |          |          |           |
|                                   | 0                      | 50                         | 105      | 55                                                             | 95                | 53       | 50       | 110       |
|                                   | 14 (+/-1)              | 24                         | 55       | 14                                                             | 16                | 23       | 50       | 16        |
|                                   | 28 (+/-2)              | 19                         | 28       | 23                                                             | 33                | 27       | 45       | 27        |
|                                   | 70-98 (+/-3)           | N/A                        | 30       | 30                                                             | 28                | 26       | 30       | 31        |
|                                   | 120 (+/-3)             | N/A                        | N/A      | 21                                                             | 26                | 22       | 25       | 21        |
|                                   | 180 (+/-3)             | N/A                        | N/A      | 29                                                             | 20                | 24       | 28       | 19        |
|                                   | 9 months               | N/A                        | N/A      | 23                                                             | 23.1 <sup>c</sup> | N/A      | N/A      | 19        |

| Group                             |                        | 1                          |          | 2a/b                                                           |                  |          |          | 3         |
|-----------------------------------|------------------------|----------------------------|----------|----------------------------------------------------------------|------------------|----------|----------|-----------|
| Treatment                         |                        | ITFFB                      |          | AAV                                                            |                  |          |          | ITFFB     |
| Dose                              |                        | N/A                        |          | 3.0 x 10 <sup>13</sup> GC<br>5.0 x 10 <sup>11</sup> GC/g Brain |                  |          |          | N/A       |
| GALC Mutation Status <sup>a</sup> |                        | Homozygous<br>(Krabbe Dog) |          | Homozygous<br>(Krabbe Dog)                                     |                  |          |          | Wild Type |
|                                   | Study Day <sup>b</sup> | K930 (F)                   | K948 (M) | K933 (M)                                                       | K937 (M)         | K938 (M) | K939 (F) | K928 (F)  |
|                                   | 12 months              | N/A                        | N/A      | 33                                                             | N/A              | N/A      | N/A      | 22        |
|                                   | 18 months              | N/A                        | N/A      | 20                                                             | N/A              | N/A      | N/A      | 21        |
|                                   | 19 months              | N/A                        | N/A      | 34 <sup>c</sup>                                                | N/A              | N/A      | N/A      | 25        |
|                                   |                        |                            |          |                                                                |                  |          |          |           |
| <b>Phosphorus<br/>(mg/dL)</b>     | 0                      | 8.6                        | 10.8     | 10.3                                                           | 10.9             | 9.5      | 8.6      | 9.6       |
|                                   | 14 (+/-1)              | 8.4                        | 8.8      | 9.4                                                            | 9.8              | 8.5      | 8.6      | 9.3       |
|                                   | 28 (+/-2)              | 10.3                       | 11.3     | 10.7                                                           | 11.5             | 13.1     | 10.2     | 10.2      |
|                                   | 70-98 (+/-3)           | N/A                        | 12.0     | 10.3                                                           | 10.1             | 10.3     | 9.3      | 9.6       |
|                                   | 120 (+/-3)             | N/A                        | N/A      | 9.2                                                            | 10.2             | 8.9      | 8.1      | 9.1       |
|                                   | 180 (+/-3)             | N/A                        | N/A      | 8.0                                                            | 9.2              | 7.9      | 7.7      | 6.6       |
|                                   | 9 months               | N/A                        | N/A      | 4.9                                                            | 3.1 <sup>c</sup> | N/A      | N/A      | 4.9       |
|                                   | 12 months              | N/A                        | N/A      | 8.3                                                            | N/A              | N/A      | N/A      | 5.8       |
|                                   | 18 months              | N/A                        | N/A      | 4.2                                                            | N/A              | N/A      | N/A      | 4.1       |
|                                   | 19 months              | N/A                        | N/A      | 5.2 <sup>c</sup>                                               | N/A              | N/A      | N/A      | 3.3       |
|                                   |                        |                            |          |                                                                |                  |          |          |           |
| <b>Glucose (mg/dL)</b>            | 0                      | 126                        | 166      | 150                                                            | 155              | 155      | 148      | 139       |
|                                   | 14 (+/-1)              | 131                        | 154      | 139                                                            | 133              | 150      | 143      | 132       |
|                                   | 28 (+/-2)              | 126                        | 128      | 170                                                            | 144              | 135      | 209      | 122       |
|                                   | 70-98 (+/-3)           | N/A                        | 165      | 148                                                            | 139              | 136      | 119      | 140       |
|                                   | 120 (+/-3)             | N/A                        | N/A      | 146                                                            | 117              | 141      | 143      | 128       |
|                                   | 180 (+/-3)             | N/A                        | N/A      | 140                                                            | 131              | 131      | 129      | 123       |
|                                   | 9 months               | N/A                        | N/A      | 113                                                            | 159 <sup>c</sup> | N/A      | N/A      | 120       |
|                                   | 12 months              | N/A                        | N/A      | 110                                                            | N/A              | N/A      | N/A      | 118       |

| Group                             |                        | 1                          |          | 2a/b                                                           |                   |          |          | 3         |
|-----------------------------------|------------------------|----------------------------|----------|----------------------------------------------------------------|-------------------|----------|----------|-----------|
| Treatment                         |                        | ITFFB                      |          | AAV                                                            |                   |          |          | ITFFB     |
| Dose                              |                        | N/A                        |          | 3.0 x 10 <sup>13</sup> GC<br>5.0 x 10 <sup>11</sup> GC/g Brain |                   |          |          | N/A       |
| GALC Mutation Status <sup>a</sup> |                        | Homozygous<br>(Krabbe Dog) |          | Homozygous<br>(Krabbe Dog)                                     |                   |          |          | Wild Type |
|                                   | Study Day <sup>b</sup> | K930 (F)                   | K948 (M) | K933 (M)                                                       | K937 (M)          | K938 (M) | K939 (F) | K928 (F)  |
|                                   | 18 months              | N/A                        | N/A      | 104                                                            | N/A               | N/A      | N/A      | 115       |
|                                   | 19 months              | N/A                        | N/A      | 112 <sup>c</sup>                                               | N/A               | N/A      | N/A      | 116       |
| <b>Calcium (mg/dL)</b>            |                        |                            |          |                                                                |                   |          |          |           |
|                                   | 0                      | 10.6                       | 12.1     | 10.8                                                           | 10.9              | 11.0     | 11.0     | 11.2      |
|                                   | 14 (+/-1)              | 11.5                       | 11.2     | 11.5                                                           | 11.3              | 10.8     | 10.8     | 11.9      |
|                                   | 28 (+/-2)              | 11.2                       | 10.8     | 11.1                                                           | 11.4              | 11.7     | 11.1     | 10.6      |
|                                   | 70-98 (+/-3)           | N/A                        | 12.3     | 11.0                                                           | 11.8              | 11.2     | 10.4     | 10.8      |
|                                   | 120 (+/-3)             | N/A                        | N/A      | 11.1                                                           | 11.0              | 10.3     | 9.9      | 10.7      |
|                                   | 180 (+/-3)             | N/A                        | N/A      | 10.2                                                           | 9.5               | 10.2     | 10.0     | 10.0      |
|                                   | 9 months               | N/A                        | N/A      | 9.9                                                            | 11.2 <sup>c</sup> | N/A      | N/A      | 10.1      |
|                                   | 12 months              | N/A                        | N/A      | 10.1                                                           | N/A               | N/A      | N/A      | 10.2      |
|                                   | 18 months              | N/A                        | N/A      | 10.2                                                           | N/A               | N/A      | N/A      | 10.2      |
|                                   | 19 months              | N/A                        | N/A      | 11.2 <sup>c</sup>                                              | N/A               | N/A      | N/A      | 9.1       |
| <b>Corrected Calcium</b>          |                        |                            |          |                                                                |                   |          |          |           |
|                                   | 0                      | 11.5                       | 12.9     | 11.8                                                           | 11.9              | 12.1     | 12.2     | 11.8      |
|                                   | 14 (+/-1)              | 11.8                       | N/A      | 11.9                                                           | 12.5              | 11.6     | 11.3     | 12.5      |
|                                   | 28 (+/-2)              | 11.9                       | 11.3     | 11.7                                                           | 12.5              | 12.3     | 11.8     | 11.5      |
|                                   | 70-98 (+/-3)           | N/A                        | 12.5     | 11.6                                                           | 12.3              | 11.7     | 11.0     | 11.5      |
|                                   | 120 (+/-3)             | N/A                        | N/A      | 11.6                                                           | 11.5              | 10.8     | 10.5     | 11.3      |
|                                   | 180 (+/-3)             | N/A                        | N/A      | 10.8                                                           | 10.0              | 10.7     | 10.7     | 10.6      |
|                                   | 9 months               | N/A                        | N/A      | 10.4                                                           | N/A               | N/A      | N/A      | 10.8      |
|                                   | 12 months              | N/A                        | N/A      | 10.4                                                           | N/A               | N/A      | N/A      | 10.4      |
|                                   | 18 months              | N/A                        | N/A      | 10.3                                                           | N/A               | N/A      | N/A      | N/A       |

| Group                             |                        | 1                          |          | 2a/b                                                           |                  |          |          | 3         |
|-----------------------------------|------------------------|----------------------------|----------|----------------------------------------------------------------|------------------|----------|----------|-----------|
| Treatment                         |                        | ITFFB                      |          | AAV                                                            |                  |          |          | ITFFB     |
| Dose                              |                        | N/A                        |          | 3.0 x 10 <sup>13</sup> GC<br>5.0 x 10 <sup>11</sup> GC/g Brain |                  |          |          | N/A       |
| GALC Mutation Status <sup>a</sup> |                        | Homozygous<br>(Krabbe Dog) |          | Homozygous<br>(Krabbe Dog)                                     |                  |          |          | Wild Type |
|                                   | Study Day <sup>b</sup> | K930 (F)                   | K948 (M) | K933 (M)                                                       | K937 (M)         | K938 (M) | K939 (F) | K928 (F)  |
|                                   | 19 months              | N/A                        | N/A      | N/A                                                            | N/A              | N/A      | N/A      | 9.4       |
| Sodium (mEq/L)                    | 0                      | 142                        | 145      | 138                                                            | 140              | 145      | 141      | 142       |
|                                   | 14 (+/-1)              | 147                        | 144      | 144                                                            | 148              | 144      | 146      | 152       |
|                                   | 28 (+/-2)              | 144                        | 146      | 145                                                            | 146              | 145      | 142      | 143       |
|                                   | 70-98 (+/-3)           | N/A                        | 156      | 147                                                            | 146              | 149      | 147      | 145       |
|                                   | 120 (+/-3)             | N/A                        | N/A      | 144                                                            | 151              | 151      | 146      | 145       |
|                                   | 180 (+/-3)             | N/A                        | N/A      | 147                                                            | 149              | 148      | 147      | 147       |
|                                   | 9 months               | N/A                        | N/A      | 150                                                            | 150 <sup>a</sup> | N/A      | N/A      | 154       |
|                                   | 12 months              | N/A                        | N/A      | 151                                                            | N/A              | N/A      | N/A      | 153       |
|                                   | 18 months              | N/A                        | N/A      | 155                                                            | N/A              | N/A      | N/A      | 150       |
|                                   | 19 months              | N/A                        | N/A      | 143 <sup>a</sup>                                               | N/A              | N/A      | N/A      | 149       |
| Potassium (mEq/L)                 | 0                      | 4.5                        | 4.9      | 5.0                                                            | 5.0              | 5.3      | 4.2      | 5.1       |
|                                   | 14 (+/-1)              | 5.6                        | 5.6      | 6.6                                                            | 5.8              | 5.0      | 4.8      | 6.0       |
|                                   | 28 (+/-2)              | 5.2                        | 4.9      | 4.5                                                            | 4.3              | 4.8      | 4.2      | 4.9       |
|                                   | 70-98 (+/-3)           | N/A                        | 4.8      | 4.3                                                            | 5.1              | 5.3      | 4.9      | 4.6       |
|                                   | 120 (+/-3)             | N/A                        | N/A      | 4.3                                                            | 4.8              | 4.6      | 4.1      | 4.3       |
|                                   | 180 (+/-3)             | N/A                        | N/A      | 4.3                                                            | 4.2              | 4.4      | 4.3      | 4.3       |
|                                   | 9 months               | N/A                        | N/A      | 4.2                                                            | 4.2 <sup>c</sup> | N/A      | N/A      | 4.2       |
|                                   | 12 months              | N/A                        | N/A      | 4.8                                                            | N/A              | N/A      | N/A      | 4.5       |
|                                   | 18 months              | N/A                        | N/A      | 4.1                                                            | N/A              | N/A      | N/A      | 4         |
|                                   | 19 months              | N/A                        | N/A      | 4.1 <sup>c</sup>                                               | N/A              | N/A      | N/A      | 3.7       |



| Group                             |                        | 1                          |          | 2a/b                                                           |                  |          |          | 3         |
|-----------------------------------|------------------------|----------------------------|----------|----------------------------------------------------------------|------------------|----------|----------|-----------|
| Treatment                         |                        | ITFFB                      |          | AAV                                                            |                  |          |          | ITFFB     |
| Dose                              |                        | N/A                        |          | 3.0 x 10 <sup>13</sup> GC<br>5.0 x 10 <sup>11</sup> GC/g Brain |                  |          |          | N/A       |
| GALC Mutation Status <sup>a</sup> |                        | Homozygous<br>(Krabbe Dog) |          | Homozygous<br>(Krabbe Dog)                                     |                  |          |          | Wild Type |
|                                   | Study Day <sup>b</sup> | K930 (F)                   | K948 (M) | K933 (M)                                                       | K937 (M)         | K938 (M) | K939 (F) | K928 (F)  |
| <b>Na/K Ratio</b>                 | 0                      | 32                         | 30       | 28                                                             | 28               | 27       | 34       | 28        |
|                                   | 14 (+/-1)              | 26                         | 26       | 22                                                             | 26               | 29       | 30       | 25        |
|                                   | 28 (+/-2)              | 28                         | 30       | 32                                                             | 34               | 30       | 34       | 29        |
|                                   | 70-98 (+/-3)           | N/A                        | 33       | 34                                                             | 29               | 28       | 30       | 32        |
|                                   | 120 (+/-3)             | N/A                        | N/A      | 33                                                             | 31               | 33       | 36       | 34        |
|                                   | 180 (+/-3)             | N/A                        | N/A      | 34                                                             | 35               | 34       | 34       | 34        |
|                                   | 9 months               | N/A                        | N/A      | 36                                                             | 36 <sup>c</sup>  | N/A      | N/A      | 37        |
|                                   | 12 months              | N/A                        | N/A      | 31                                                             | N/A              | N/A      | N/A      | 34        |
|                                   | 18 months              | N/A                        | N/A      | 38                                                             | N/A              | N/A      | N/A      | 38        |
|                                   | 19 months              | N/A                        | N/A      | 35 <sup>c</sup>                                                | N/A              | N/A      | N/A      | 40        |
| <b>Chloride (mEq/L)</b>           | 0                      | 100                        | 104      | 101                                                            | 101              | 103      | 104      | 101       |
|                                   | 14 (+/-1)              | 108                        | 106      | 108                                                            | 108              | 105      | 105      | 111       |
|                                   | 28 (+/-2)              | 107                        | 106      | 110                                                            | 109              | 107      | 108      | 108       |
|                                   | 70-98 (+/-3)           | N/A                        | 114      | 110                                                            | 110              | 109      | 111      | 111       |
|                                   | 120 (+/-3)             | N/A                        | N/A      | 108                                                            | 110              | 110      | 110      | 108       |
|                                   | 180 (+/-3)             | N/A                        | N/A      | 111                                                            | 114              | 111      | 110      | 109       |
|                                   | 9 months               | N/A                        | N/A      | 114                                                            | 127 <sup>c</sup> | N/A      | N/A      | 118       |
|                                   | 12 months              | N/A                        | N/A      | 116                                                            | N/A              | N/A      | N/A      | 117       |
|                                   | 18 months              | N/A                        | N/A      | 118                                                            | N/A              | N/A      | N/A      | 112       |
|                                   | 19 months              | N/A                        | N/A      | 97 <sup>c</sup>                                                | N/A              | N/A      | N/A      | 114       |

| Group                             |                        | 1                          |          | 2a/b                                                           |                  |          |          | 3         |
|-----------------------------------|------------------------|----------------------------|----------|----------------------------------------------------------------|------------------|----------|----------|-----------|
| Treatment                         |                        | ITFFB                      |          | AAV                                                            |                  |          |          | ITFFB     |
| Dose                              |                        | N/A                        |          | 3.0 x 10 <sup>13</sup> GC<br>5.0 x 10 <sup>11</sup> GC/g Brain |                  |          |          | N/A       |
| GALC Mutation Status <sup>a</sup> |                        | Homozygous<br>(Krabbe Dog) |          | Homozygous<br>(Krabbe Dog)                                     |                  |          |          | Wild Type |
|                                   | Study Day <sup>b</sup> | K930 (F)                   | K948 (M) | K933 (M)                                                       | K937 (M)         | K938 (M) | K939 (F) | K928 (F)  |
| Cholesterol (mg/dL)               | 0                      | 215                        | 264      | 237                                                            | 218              | 216      | 187      | 241       |
|                                   | 14 (+/-1)              | 261                        | 318      | 256                                                            | 233              | 252      | 197      | 229       |
|                                   | 28 (+/-2)              | 160                        | 194      | 188                                                            | 143              | 154      | 176      | 126       |
|                                   | 70-98 (+/-3)           | N/A                        | 201      | 216                                                            | 183              | 181      | 163      | 182       |
|                                   | 120 (+/-3)             | N/A                        | N/A      | 200                                                            | 213              | 222      | 161      | 206       |
|                                   | 180 (+/-3)             | N/A                        | N/A      | 191                                                            | 209              | 210      | 172      | 182       |
|                                   | 9 months               | N/A                        | N/A      | 173                                                            | 242 <sup>c</sup> | N/A      | N/A      | 162       |
|                                   | 12 months              | N/A                        | N/A      | 189                                                            | N/A              | N/A      | N/A      | 173       |
|                                   | 18 months              | N/A                        | N/A      | 161                                                            | N/A              | N/A      | N/A      | 191       |
|                                   | 19 months              | N/A                        | N/A      | 217 <sup>c</sup>                                               | N/A              | N/A      | N/A      | 184       |
| CPK (IU/L)                        | 0                      | 256                        | 219      | 282                                                            | 223              | 341      | 180      | 353       |
|                                   | 14 (+/-1)              | 210                        | 263      | 266                                                            | 98               | 629      | 223      | 222       |
|                                   | 28 (+/-2)              | 164                        | 163      | 253                                                            | 195              | 255      | 146      | 175       |
|                                   | 70-98 (+/-3)           | N/A                        | 171      | 300                                                            | 144              | 194      | 149      | 235       |
|                                   | 120 (+/-3)             | N/A                        | N/A      | 216                                                            | 145              | 145      | 104      | 166       |
|                                   | 180 (+/-3)             | N/A                        | N/A      | 112                                                            | 73               | 84       | 78       | 103       |
|                                   | 9 months               | N/A                        | N/A      | 83                                                             | N/A              | N/A      | N/A      | 162       |
|                                   | 12 months              | N/A                        | N/A      | 76                                                             | N/A              | N/A      | N/A      | 74        |
|                                   | 18 months              | N/A                        | N/A      | 58                                                             | N/A              | N/A      | N/A      | 96        |
|                                   | 19 months              | N/A                        | N/A      | 506 <sup>c</sup>                                               | N/A              | N/A      | N/A      | 71        |

K933, K928 D70 collected late on D98 instead of D70

K948 D70 collected on D66, unscheduled necropsy

| <b>Group</b>                                   | <b>1</b>                           |                 | <b>2a/b</b>                                                          |                 |                 |                 | <b>3</b>         |
|------------------------------------------------|------------------------------------|-----------------|----------------------------------------------------------------------|-----------------|-----------------|-----------------|------------------|
| <b>Treatment</b>                               | <b>ITFFB</b>                       |                 | <b>AAV</b>                                                           |                 |                 |                 | <b>ITFFB</b>     |
| <b>Dose</b>                                    | <b>N/A</b>                         |                 | <b>3.0 x 10<sup>13</sup> GC<br/>5.0 x 10<sup>11</sup> GC/g Brain</b> |                 |                 |                 | <b>N/A</b>       |
| <b><i>GALC</i> Mutation Status<sup>a</sup></b> | <b>Homozygous<br/>(Krabbe Dog)</b> |                 | <b>Homozygous<br/>(Krabbe Dog)</b>                                   |                 |                 |                 | <b>Wild Type</b> |
|                                                | <b>Study Day<sup>b</sup></b>       | <b>K930 (F)</b> | <b>K948 (M)</b>                                                      | <b>K933 (M)</b> | <b>K937 (M)</b> | <b>K938 (M)</b> | <b>K939 (F)</b>  |
|                                                |                                    |                 |                                                                      |                 |                 |                 | <b>K928 (F)</b>  |

<sup>a</sup>Mutation status refers to the canine *GALC* A.C 473 (Y158S) loss-of-function mutation. Animals homozygous for the *GALC* loss-of-function mutation exhibit phenotypes similar to that of human Krabbe disease and are referred to as Krabbe dogs.

<sup>b</sup> Study day is defined as days/weeks post treatment.

<sup>c</sup> Unscheduled terminal bleed.

**CLINICAL PATHOLOGY – BLOOD: COAGULATION PANEL**

| Group                             |                        | 1                          |          | 2a/b                                                           |          |          |          | 3         |
|-----------------------------------|------------------------|----------------------------|----------|----------------------------------------------------------------|----------|----------|----------|-----------|
| Treatment                         |                        | ITFFB                      |          | AAV                                                            |          |          |          | ITFFB     |
| Dose                              |                        | N/A                        |          | 3.0 x 10 <sup>13</sup> GC<br>5.0 x 10 <sup>11</sup> GC/g Brain |          |          |          | N/A       |
| GALC Mutation Status <sup>a</sup> |                        | Homozygous<br>(Krabbe Dog) |          | Homozygous<br>(Krabbe Dog)                                     |          |          |          | Wild Type |
|                                   | Study Day <sup>b</sup> | K930 (F)                   | K948 (M) | K933 (M)                                                       | K937 (M) | K938 (M) | K939 (F) | K928 (F)  |
| PT (sec)                          | 0                      | 7.0                        | 6.1      | 7.2                                                            | 6.8      | 6.6      | 5.2      | 7.3       |
|                                   | 14 (+/-1)              | 6.1                        | 6.1      | 6.0                                                            | 6.8      | 6.1      | 6.0      | 6.1       |
|                                   | 28 (+/-2)              | 6.7                        | 6.6      | 6.2                                                            | N/A      | N/A      | 6.2      | 7.0       |
|                                   | 70-98 (+/-3)           | N/A                        | 6.0      | 7.4                                                            | 6.4      | 6.7      | 6.0      | 7.6       |
|                                   | 120 (+/-3)             | N/A                        | N/A      | 7.8                                                            | 6.6      | 6.3      | 5.5      | 7.3       |
|                                   | 180 (+/-3)             | N/A                        | N/A      | 7.5                                                            | 6.3      | 6.3      | 6.5      | 7.4       |
|                                   | 9 months               | N/A                        | N/A      | 6.7                                                            | 6.1*     | N/A      | N/A      | 5.5       |
|                                   | 12 months              | N/A                        | N/A      | 7.4                                                            | N/A      | N/A      | N/A      | 7.6       |
|                                   | 18 months              | N/A                        | N/A      | 7.9                                                            | N/A      | N/A      | N/A      | 7.3       |
|                                   | 19 months              | N/A                        | N/A      | N/A                                                            | N/A      | N/A      | N/A      | 9.2       |
| APTT (sec)                        | 0                      | 10.0                       | 12.2     | 11.4                                                           | 13.2     | 13.1     | 13.4     | 10.5      |
|                                   | 14 (+/-1)              | 13.4                       | 10.8     | 10.0                                                           | 11.7     | 11.0     | 12.3     | 11.2      |
|                                   | 28 (+/-2)              | 10.5                       | 11.1     | 10.6                                                           | N/A      | N/A      | 11.1     | 11.0      |
|                                   | 70-98 (+/-3)           | N/A                        | 10.3     | 8.9                                                            | 10.0     | 10.3     | 12.1     | 10.2      |
|                                   | 120 (+/-3)             | N/A                        | N/A      | 10.0                                                           | 8.0      | 8.2      | 9.2      | 10.0      |
|                                   | 180 (+/-3)             | N/A                        | N/A      | 10.0                                                           | 10.7     | 10.0     | 10.0     | 10.0      |
|                                   | 9 months               | N/A                        | N/A      | 9.6                                                            | 10.8*    | N/A      | N/A      | 9.5       |
|                                   | 12 months              | N/A                        | N/A      | 14.1                                                           | N/A      | N/A      | N/A      | 11.6      |
|                                   | 18 months              | N/A                        | N/A      | 8.9                                                            | N/A      | N/A      | N/A      | 9.1       |
|                                   | 19 months              | N/A                        | N/A      | N/A                                                            | N/A      | N/A      | N/A      | 9.9       |
| Fibrinogen (mg/dL)                | 0                      | 171                        | 182      | 117                                                            | 164      | 181      | 161      | 158       |
|                                   | 14 (+/-1)              | 193                        | 173      | 170                                                            | 217      | 162      | 217      | 163       |

| Group                             |                        | 1                          |          | 2a/b                                                           |          |          |          | 3         |
|-----------------------------------|------------------------|----------------------------|----------|----------------------------------------------------------------|----------|----------|----------|-----------|
| Treatment                         |                        | ITFFB                      |          | AAV                                                            |          |          |          | ITFFB     |
| Dose                              |                        | N/A                        |          | 3.0 x 10 <sup>13</sup> GC<br>5.0 x 10 <sup>11</sup> GC/g Brain |          |          |          | N/A       |
| GALC Mutation Status <sup>a</sup> |                        | Homozygous<br>(Krabbe Dog) |          | Homozygous<br>(Krabbe Dog)                                     |          |          |          | Wild Type |
|                                   | Study Day <sup>b</sup> | K930 (F)                   | K948 (M) | K933 (M)                                                       | K937 (M) | K938 (M) | K939 (F) | K928 (F)  |
|                                   | 28 (+/-2)              | 194                        | 198      | 183                                                            | N/A      | N/A      | 170.2    | 170       |
|                                   | 70-98 (+/-3)           | N/A                        | 310      | 191                                                            | 379      | 350      | 322      | 162       |
|                                   | 120 (+/-3)             | N/A                        | N/A      | 271                                                            | 247      | 316      | 193      | 294       |
|                                   | 180 (+/-3)             | N/A                        | N/A      | 154                                                            | 316      | 167      | 172      | 158       |
|                                   | 9 months               | N/A                        | N/A      | 178                                                            | 455*     | N/A      | N/A      | 190       |
|                                   | 12 months              | N/A                        | N/A      | 188                                                            | N/A      | N/A      | N/A      | 166       |
|                                   | 18 months              | N/A                        | N/A      | 222                                                            | N/A      | N/A      | N/A      | <45       |
|                                   | 19 months              | N/A                        | N/A      | N/A                                                            | N/A      | N/A      | N/A      | 103       |
|                                   | 0                      | 40                         | 29       | 801                                                            | 100      | 72       | 123      | 840       |
|                                   | 14 (+/-1)              | 133                        | 97       | N/A                                                            | 40       | 77       | 88       | N/A       |
|                                   | 28 (+/-2)              | 16                         | 54       | 43                                                             | N/A      | N/A      | 37       | 42        |
|                                   | 70-98 (+/-3)           | N/A                        | 314      | 88                                                             | 71       | 49       | 62       | 117       |
|                                   | 120 (+/-3)             | N/A                        | N/A      | 150                                                            | 97       | 16       | 120      | 138       |
|                                   | 180 (+/-3)             | N/A                        | N/A      | 118                                                            | 16       | 87       | 48       | 135       |
|                                   | 9 months               | N/A                        | N/A      | 158                                                            | >5400*   | N/A      | N/A      | 45        |
|                                   | 12 months              | N/A                        | N/A      | 185                                                            | N/A      | N/A      | N/A      | 58        |
|                                   | 18 months              | N/A                        | N/A      | 62                                                             | N/A      | N/A      | N/A      | 1021      |
|                                   | 19 months              | N/A                        | N/A      | N/A                                                            | N/A      | N/A      | N/A      | 11556     |

K933, K928 D70 collected late on D98 instead of D70

K948 D70 collected on D66, unscheduled necropsy

<sup>a</sup>Mutation status refers to the canine *GALC* A.C 473 (Y158S) loss-of-function mutation. Animals homozygous for the *GALC* loss-of-function mutation exhibit phenotypes similar to that of human Krabbe disease and are referred to as Krabbe dogs.

<sup>b</sup> Study day is defined as days/weeks post treatment.

| <b>Group</b>                                   |                              | <b>1</b>                           |                 | <b>2a/b</b>                                                          |                 |                 |                 | <b>3</b>         |
|------------------------------------------------|------------------------------|------------------------------------|-----------------|----------------------------------------------------------------------|-----------------|-----------------|-----------------|------------------|
| <b>Treatment</b>                               |                              | <b>ITFFB</b>                       |                 | <b>AAV</b>                                                           |                 |                 |                 | <b>ITFFB</b>     |
| <b>Dose</b>                                    |                              | <b>N/A</b>                         |                 | <b>3.0 x 10<sup>13</sup> GC<br/>5.0 x 10<sup>11</sup> GC/g Brain</b> |                 |                 |                 | <b>N/A</b>       |
| <b><i>GALC</i> Mutation Status<sup>a</sup></b> |                              | <b>Homozygous<br/>(Krabbe Dog)</b> |                 | <b>Homozygous<br/>(Krabbe Dog)</b>                                   |                 |                 |                 | <b>Wild Type</b> |
|                                                | <b>Study Day<sup>b</sup></b> | <b>K930 (F)</b>                    | <b>K948 (M)</b> | <b>K933 (M)</b>                                                      | <b>K937 (M)</b> | <b>K938 (M)</b> | <b>K939 (F)</b> | <b>K928 (F)</b>  |

<sup>c</sup>Unscheduled terminal bleed.

## CLINICAL PATHOLOGY – CEREBROSPINAL FLUID

| Group                             |                        | 1                          |           | 2a/b                                                           |                        |           |           | 3         |
|-----------------------------------|------------------------|----------------------------|-----------|----------------------------------------------------------------|------------------------|-----------|-----------|-----------|
| Treatment                         |                        | ITFFB                      |           | AAV                                                            |                        |           |           | ITFFB     |
| Dose                              |                        | N/A                        |           | 3.0 x 10 <sup>13</sup> GC<br>5.0 x 10 <sup>11</sup> GC/g Brain |                        |           |           | N/A       |
| GALC Mutation Status <sup>a</sup> |                        | Homozygous<br>(Krabbe Dog) |           | Homozygous<br>(Krabbe Dog)                                     |                        |           |           | Wild Type |
|                                   | Study Day <sup>b</sup> | K930 (F)                   | K948 (M)  | K933 (M)                                                       | K937 (M)               | K938 (M)  | K939 (F)  | K928 (F)  |
| <b>Color</b>                      | 0                      | N/A                        | N/A       | N/A                                                            | N/A                    | N/A       | N/A       | N/A       |
|                                   | 14 (+/-1)              | N/A                        | N/A       | N/A                                                            | N/A                    | N/A       | N/A       | N/A       |
|                                   | 28 (+/-2)              | Colorless                  | Colorless | Colorless                                                      | Colorless              | Colorless | Colorless | Colorless |
|                                   | 70-98 (+/-3)           | N/A                        | Colorless | Colorless                                                      | Colorless              | Colorless | Colorless | Colorless |
|                                   | 120 (+/-3)             | N/A                        | N/A       | Colorless                                                      | Colorless              | Colorless | Colorless | Colorless |
|                                   | 180 (+/-3)             | N/A                        | N/A       | Colorless                                                      | Colorless              | Colorless | Colorless | Colorless |
|                                   | 9 months               | N/A                        | N/A       | Colorless                                                      | Colorless <sup>c</sup> | N/A       | N/A       | Colorless |
|                                   | 12 months              | N/A                        | N/A       | Colorless                                                      | N/A                    | N/A       | N/A       | Colorless |
|                                   | 18 months              | N/A                        | N/A       | Colorless                                                      | N/A                    | N/A       | N/A       | Colorless |
|                                   | 19 months              | N/A                        | N/A       | Colorless <sup>c</sup>                                         | N/A                    | N/A       | N/A       | Colorless |
| <b>Clarity</b>                    | 0                      | N/A                        | N/A       | N/A                                                            | N/A                    | N/A       | N/A       | N/A       |
|                                   | 14 (+/-1)              | N/A                        | N/A       | N/A                                                            | N/A                    | N/A       | N/A       | N/A       |
|                                   | 28 (+/-2)              | Clear                      | Clear     | Clear                                                          | Clear                  | Clear     | Clear     | Clear     |
|                                   | 70-98 (+/-3)           | N/A                        | Clear     | Clear                                                          | Clear                  | Clear     | Clear     | Clear     |
|                                   | 120 (+/-3)             | N/A                        | N/A       | Clear                                                          | Clear                  | Clear     | Clear     | Clear     |
|                                   | 180 (+/-3)             | N/A                        | N/A       | Clear                                                          | Clear                  | Clear     | Clear     | Clear     |
|                                   | 9 months               | N/A                        | N/A       | Clear                                                          | Clear <sup>c</sup>     | N/A       | N/A       | Clear     |
|                                   | 12 months              | N/A                        | N/A       | Clear                                                          | N/A                    | N/A       | N/A       | Clear     |
|                                   | 18 months              | N/A                        | N/A       | Clear                                                          | N/A                    | N/A       | N/A       | Clear     |
|                                   | 19 months              | N/A                        | N/A       | Clear <sup>c</sup>                                             | N/A                    | N/A       | N/A       | Clear     |
| <b>WBC ( /μL)</b>                 | 0                      | N/A                        | N/A       | N/A                                                            | N/A                    | N/A       | N/A       | N/A       |
|                                   | 14 (+/-1)              | N/A                        | N/A       | N/A                                                            | N/A                    | N/A       | N/A       | N/A       |

| Group                             |                        | 1                          |          | 2a/b                                                           |                |          |          | 3         |
|-----------------------------------|------------------------|----------------------------|----------|----------------------------------------------------------------|----------------|----------|----------|-----------|
| Treatment                         |                        | ITFFB                      |          | AAV                                                            |                |          |          | ITFFB     |
| Dose                              |                        | N/A                        |          | 3.0 x 10 <sup>13</sup> GC<br>5.0 x 10 <sup>11</sup> GC/g Brain |                |          |          | N/A       |
| GALC Mutation Status <sup>a</sup> |                        | Homozygous<br>(Krabbe Dog) |          | Homozygous<br>(Krabbe Dog)                                     |                |          |          | Wild Type |
|                                   | Study Day <sup>b</sup> | K930 (F)                   | K948 (M) | K933 (M)                                                       | K937 (M)       | K938 (M) | K939 (F) | K928 (F)  |
|                                   | 28 (+/-2)              | 0                          | 2        | 10                                                             | 0              | 6        | 1        | 0         |
|                                   | 70-98 (+/-3)           | N/A                        | 1        | 2                                                              | 0              | 0        | 0        | 0         |
|                                   | 120 (+/-3)             | N/A                        | N/A      | 1                                                              | 1              | 3        | 3        | 1         |
|                                   | 180 (+/-3)             | N/A                        | N/A      | 2                                                              | 1              | 1        | 2        | 0         |
|                                   | 9 months               | N/A                        | N/A      | 1                                                              | 2 <sup>c</sup> | N/A      | N/A      | 0         |
|                                   | 12 months              | N/A                        | N/A      | 2                                                              | N/A            | N/A      | N/A      | 1         |
|                                   | 18 months              | N/A                        | N/A      | 1                                                              | N/A            | N/A      | N/A      | 0         |
|                                   | 19 months              | N/A                        | N/A      | 1 <sup>c</sup>                                                 | N/A            | N/A      | N/A      | 0         |
|                                   | 0                      | N/A                        | N/A      | N/A                                                            | N/A            | N/A      | N/A      | N/A       |
|                                   | 14 (+/-1)              | N/A                        | N/A      | N/A                                                            | N/A            | N/A      | N/A      | N/A       |
|                                   | 28 (+/-2)              | 0                          | 0        | 0                                                              | 0              | 14       | 0        | 0         |
|                                   | 70-98 (+/-3)           | N/A                        | 0        | 144                                                            | 0              | 0        | 0        | 2         |
|                                   | 120 (+/-3)             | N/A                        | N/A      | 320                                                            | 0              | 0        | 0        | 10        |
|                                   | 180 (+/-3)             | N/A                        | N/A      | 20                                                             | 1              | 1        | 270      | 10        |
|                                   | 9 months               | N/A                        | N/A      | 1                                                              | 1 <sup>c</sup> | N/A      | N/A      | 0         |
|                                   | 12 months              | N/A                        | N/A      | 1                                                              | N/A            | N/A      | N/A      | 10        |
|                                   | 18 months              |                            |          | 10                                                             | N/A            | N/A      | N/A      | 0         |
|                                   | 19 months              | N/A                        | N/A      | 10 <sup>c</sup>                                                | N/A            | N/A      | N/A      | 0         |
|                                   | 0                      | N/A                        | N/A      | N/A                                                            | N/A            | N/A      | N/A      | N/A       |
|                                   | 14 (+/-1)              | N/A                        | N/A      | N/A                                                            | N/A            | N/A      | N/A      | N/A       |
|                                   | 28 (+/-2)              | 20                         | 29       | 17                                                             | N/A            | N/A      | N/A      | 10        |



| Group                             |                        | 1                          |          | 2a/b                                                           |                 |          |          | 3         |
|-----------------------------------|------------------------|----------------------------|----------|----------------------------------------------------------------|-----------------|----------|----------|-----------|
| Treatment                         |                        | ITFFB                      |          | AAV                                                            |                 |          |          | ITFFB     |
| Dose                              |                        | N/A                        |          | 3.0 x 10 <sup>13</sup> GC<br>5.0 x 10 <sup>11</sup> GC/g Brain |                 |          |          | N/A       |
| GALC Mutation Status <sup>a</sup> |                        | Homozygous<br>(Krabbe Dog) |          | Homozygous<br>(Krabbe Dog)                                     |                 |          |          | Wild Type |
|                                   | Study Day <sup>b</sup> | K930 (F)                   | K948 (M) | K933 (M)                                                       | K937 (M)        | K938 (M) | K939 (F) | K928 (F)  |
|                                   | 70-98 (+/-3)           | N/A                        | 45       | 16                                                             | 13              | 14       | 10       | 11        |
|                                   | 120 (+/-3)             | N/A                        | N/A      | 15                                                             | 15              | 13       | 11       | 11        |
|                                   | 180 (+/-3)             | N/A                        | N/A      | 17                                                             | 18              | 15       | 15       | 13        |
|                                   | 9 months               | N/A                        | N/A      | 17                                                             | 69 <sup>c</sup> | N/A      | N/A      | 12        |
|                                   | 12 months              | N/A                        | N/A      | 20                                                             | N/A             | N/A      | N/A      | 11        |
|                                   | 18 months              | N/A                        | N/A      | 19                                                             | N/A             | N/A      | N/A      | 14        |
|                                   | 19 months              | N/A                        | N/A      | 19 <sup>c</sup>                                                | N/A             | N/A      | N/A      | 11        |
|                                   | 0                      | N/A                        | N/A      | N/A                                                            | N/A             | N/A      | N/A      | N/A       |
|                                   | 14 (+/-1)              | N/A                        | N/A      | N/A                                                            | N/A             | N/A      | N/A      | N/A       |
|                                   | 28 (+/-2)              | 81                         | 87       | 100                                                            | N/A             | N/A      | N/A      | 75        |
|                                   | 70-98 (+/-3)           | N/A                        | 112      | 101                                                            | 95              | 92       | 84       | 78        |
|                                   | 120 (+/-3)             | N/A                        | N/A      | 91                                                             | 88              | 90       | 97       | 79        |
|                                   | 180 (+/-3)             | N/A                        | N/A      | 91                                                             | 89              | 83       | 92       | 80        |
|                                   | 9 months               | N/A                        | N/A      | 83                                                             | N/A             | N/A      | N/A      | 77        |
|                                   | 12 months              | N/A                        | N/A      | 79                                                             | N/A             | N/A      | N/A      | 79        |
|                                   | 18 months              | N/A                        | N/A      | 85                                                             | N/A             | N/A      | N/A      | 87        |
|                                   | 19 months              | N/A                        | N/A      | 88 <sup>c</sup>                                                | N/A             | N/A      | N/A      | 56        |

K933, K928 D70 collected late on D98 instead of D70

K948 D70 collected on D66, unscheduled necropsy

<sup>a</sup>Mutation status refers to the canine *GALC* A.C 473 (Y158S) loss-of-function mutation. Animals homozygous for the *GALC* loss-of-function mutation exhibit phenotypes similar to that of human Krabbe disease and are referred to as Krabbe dogs.

<sup>b</sup>Study day is defined as days/weeks post treatment.

<sup>c</sup>Unscheduled terminal bleed.
