# Supplementary material for: Efficacy and Safety of a Krabbe Disease Gene Therapy
Source: PubMed Central journal article supplement (PMC9142772; doi:10.1089/hum.2021.245), 2022-05-16
Supplement: Supp_DataS2.pdf [file Supp_DataS2.pdf]

## BLOOD

| CBC & COAGULATION PANELS |                                | SERUM CHEMISTRY PANEL |                                            | OTHER        |                                      |
|--------------------------|--------------------------------|-----------------------|--------------------------------------------|--------------|--------------------------------------|
| Abbreviation             | Definition                     | Abbreviation          | Definition                                 | Abbreviation | Definition                           |
| ANIS                     | Anisocytosis                   | A/G                   | Albumin/Globulin Ratio                     | BL           | Baseline (Day -28 to -1)             |
| APTT                     | Activated PTT                  | ALB                   | Albumin                                    | GC           | Genome Copies                        |
| BAS                      | Absolute Basophils             | ALD                   | Aldolase                                   | HEM          | Hemolyzed                            |
| BAS%                     | % Basophils                    | ALP                   | Alkaline Phosphatase                       | ID           | Identification Number                |
| CBC                      | Complete Blood Count           | ALT                   | Alanine Aminotransferase                   | ITFFB        | Intrathecal Final Formulation Buffer |
| CPLT                     | Clumped Platelets              | AST                   | Aspartate Aminotransferase                 | N/A          | Not Applicable                       |
| DIME                     | D-DIMER-FEU                    | BUN                   | Blood Urea Nitrogen                        |              |                                      |
| EOS                      | Absolute Eosinophils           | CA                    | Calcium                                    |              |                                      |
| EOS%                     | % Eosinophils                  | CKBB                  | CPK, Brain Isoenzyme                       |              |                                      |
| FDP                      | Fibrin Degradation Products    | CKB%                  | % CPK, Brain Isoenzyme                     |              |                                      |
| FIB                      | Fibrinogen                     | CKMB                  | CPK, Heart Isoenzyme                       |              |                                      |
| HB                       | Hemoglobin                     | CMB%                  | % CPK, Heart Isoenzyme                     |              |                                      |
| HCT                      | Hematocrit                     | CKMM                  | CPK, Skeletal Muscle Isoenzyme             |              |                                      |
| LUC                      | Absolute Large Unstained Cells | CKM%                  | % CPK, Skeletal Muscle Isoenzyme           |              |                                      |
| LUC%                     | % Large Unstained Cells        | CL                    | Chloride                                   |              |                                      |
| LYMPH                    | Absolute Lymphocytes           | CPK                   | Creatine Phosphokinase                     |              |                                      |
| LYMPH%                   | % Lymphocytes                  | CREA                  | Creatinine                                 |              |                                      |
| MAC                      | Macrocytosis                   | GGT                   | Gamma-Glutamyl Transferase                 |              |                                      |
| MCH                      | Mean Corpuscular Hemoglobin    | GLOB                  | Globulin<br>(calculated as TPRO minus ALB) |              |                                      |
| MCHC                     | MCH Concentration              | GLU                   | Glucose                                    |              |                                      |
| MCV                      | Mean Corpuscular Volume        | K                     | Potassium                                  |              |                                      |
| MONO                     | Absolute Monocytes             | LDH                   | Lactate Dehydrogenase                      |              |                                      |
| MONO%                    | % Monocytes                    | NA                    | Sodium                                     |              |                                      |
| NEU                      | Absolute Neutrophils           | PHOS                  | Inorganic Phosphorus                       |              |                                      |
| NEU%                     | % Neutrophils                  | QNS                   | Quantity Not Sufficient                    |              |                                      |
| NOSA                     | No Sample Submitted            | TBIL                  | Total Bilirubin                            |              |                                      |
| PLT                      | Platelet Count                 | TPRO                  | Total Protein                              |              |                                      |
| PT                       | Prothrombin Time               |                       |                                            |              |                                      |
| RBC                      | Red Blood Cell Count           |                       |                                            |              |                                      |
| TRB                      | Turbid                         |                       |                                            |              |                                      |
| WBC                      | White Blood Cell Count         |                       |                                            |              |                                      |

| Group (Necropsy Day)                                    |                             | Group 1 (Necropsy Day 90±4) |       |       |       |       |       |       |       |       |     |
|---------------------------------------------------------|-----------------------------|-----------------------------|-------|-------|-------|-------|-------|-------|-------|-------|-----|
| Animal ID (Sex)                                         |                             | 18-162 (Female)             |       |       |       |       |       |       |       |       |     |
| Treatment (Dose)                                        |                             | ITFFB (N/A)                 |       |       |       |       |       |       |       |       |     |
| Study Day                                               | BL                          | 0                           | 7±1   | 14±2  | 28±3  | 60±3  | 90±4  | 120±4 | 150±4 | 180±5 |     |
| Complete Blood Counts (Hematology) & Plasma Coagulation | WBC (10 <sup>3</sup> /μL)   | 3.93                        | 5.80  | 2.91  | 7.22  | 6.00  | 11.98 | 5.09  | N/A   | N/A   | N/A |
|                                                         | RBC (10 <sup>6</sup> /μL)   | 5.77                        | 5.48  | 5.51  | 5.75  | 5.82  | 6.20  | 5.78  | N/A   | N/A   | N/A |
|                                                         | HB (g/dL)                   | 13.6                        | 13.0  | 13.0  | 13.2  | 13.3  | 14.5  | 13.4  | N/A   | N/A   | N/A |
|                                                         | HCT (%)                     | 45.2                        | 43.0  | 42.9  | 44.8  | 44.9  | 47.1  | 43.5  | N/A   | N/A   | N/A |
|                                                         | MCV (fL)                    | 78.3                        | 78.5  | 77.7  | 77.9  | 77.0  | 76.0  | 75.3  | N/A   | N/A   | N/A |
|                                                         | MCH (pg)                    | 23.6                        | 23.8  | 23.5  | 22.9  | 22.9  | 23.3  | 23.2  | N/A   | N/A   | N/A |
|                                                         | MCHC (g/dL)                 | 30.1                        | 30.3  | 30.3  | 29.4  | 29.7  | 30.7  | 30.8  | N/A   | N/A   | N/A |
|                                                         | PLT (10 <sup>3</sup> /μL)   | 101                         | 423   | 231   | 301   | 392   | 417   | 351   | N/A   | N/A   | N/A |
|                                                         | NEU% (%)                    | 35.3                        | 35.8  | 33.4  | 33.1  | 43.4  | 73.3  | 41.2  | N/A   | N/A   | N/A |
|                                                         | NEU (10 <sup>3</sup> /μL)   | 1.39                        | 2.07  | 0.97  | 2.39  | 2.61  | 8.77  | 2.10  | N/A   | N/A   | N/A |
|                                                         | LYMPH% (%)                  | 56.9                        | 57.2  | 57.1  | 59.3  | 49.4  | 20.8  | 49.4  | N/A   | N/A   | N/A |
|                                                         | LYMPH (10 <sup>3</sup> /μL) | 2.23                        | 3.31  | 1.66  | 4.28  | 2.96  | 2.50  | 2.52  | N/A   | N/A   | N/A |
|                                                         | MONO% (%)                   | 3.2                         | 2.8   | 5.6   | 3.4   | 3.2   | 3.7   | 4.0   | N/A   | N/A   | N/A |
|                                                         | MONO (10 <sup>3</sup> /μL)  | 0.12                        | 0.16  | 0.16  | 0.25  | 0.19  | 0.44  | 0.20  | N/A   | N/A   | N/A |
|                                                         | EOS% (%)                    | 3.0                         | 2.6   | 1.1   | 1.9   | 2.1   | 0.6   | 3.0   | N/A   | N/A   | N/A |
|                                                         | EOS (10 <sup>3</sup> /μL)   | 0.12                        | 0.15  | 0.03  | 0.14  | 0.12  | 0.08  | 0.15  | N/A   | N/A   | N/A |
|                                                         | BAS% (%)                    | 0.4                         | 0.4   | 0.6   | 1.0   | 0.4   | 0.8   | 0.5   | N/A   | N/A   | N/A |
|                                                         | BAS (10 <sup>3</sup> /μL)   | 0.02                        | 0.02  | 0.02  | 0.07  | 0.02  | 0.10  | 0.03  | N/A   | N/A   | N/A |
|                                                         | LUC% (%)                    | 1.2                         | 1.2   | 2.1   | 1.3   | 1.6   | 0.8   | 1.9   | N/A   | N/A   | N/A |
|                                                         | LUC (10 <sup>3</sup> /μL)   | 0.05                        | 0.07  | 0.06  | 0.10  | 0.09  | 0.09  | 0.10  | N/A   | N/A   | N/A |
|                                                         | MAC                         | +                           | +     | +     | +     | +     | +     | +     | N/A   | N/A   | N/A |
|                                                         | LPLT                        | N/A                         | N/A   | N/A   | N/A   | N/A   | N/A   | N/A   | N/A   | N/A   | N/A |
|                                                         | CPLT                        | N/A                         | N/A   | N/A   | N/A   | N/A   | N/A   | +     | N/A   | N/A   | N/A |
| ANIS                                                    | N/A                         | N/A                         | N/A   | N/A   | N/A   | N/A   | N/A   | N/A   | N/A   | N/A   |     |
| ATYP                                                    | N/A                         | N/A                         | N/A   | N/A   | N/A   | N/A   | N/A   | N/A   | N/A   | N/A   |     |
| COMMENT                                                 | N/A                         | N/A                         | N/A   | N/A   | HEM   | N/A   | N/A   | N/A   | N/A   | N/A   |     |
| PT (sec)                                                | 10.4                        | 10.5                        | 10.5  | 10.4  | 10.5  | 11.1  | 11.0  | N/A   | N/A   | N/A   |     |
| APTT (sec)                                              | 21.2                        | 21.9                        | 21.3  | 21.5  | 22.0  | 23.6  | 22.7  | N/A   | N/A   | N/A   |     |
| FIB (mg/dL)                                             | 179                         | 195                         | 183   | 176   | 199   | 191   | 181   | N/A   | N/A   | N/A   |     |
| DIME (ng/mL)                                            | 449.4                       | 706.0                       | 470.8 | 380.7 | 282.7 | 830.1 | 458.0 | N/A   | N/A   | N/A   |     |
| FDP (FEU)                                               | <2.5                        | 5.0                         | <2.5  | 2.5   | <2.5  | 2.5   | 2.5   | N/A   | N/A   | N/A   |     |

| Group (Necropsy Day) |              | Group 1 (Necropsy Day 90±4) |      |      |      |      |      |       |       |       |     |
|----------------------|--------------|-----------------------------|------|------|------|------|------|-------|-------|-------|-----|
| Animal ID (Sex)      |              | 18-162 (Female)             |      |      |      |      |      |       |       |       |     |
| Treatment (Dose)     |              | ITFFB (N/A)                 |      |      |      |      |      |       |       |       |     |
| Study Day            | BL           | 0                           | 7±1  | 14±2 | 28±3 | 60±3 | 90±4 | 120±4 | 150±4 | 180±5 |     |
| Serum Chemistry      | BUN (mg/dL)  | 19                          | 25   | 29   | 17   | 30   | 37   | 28    | N/A   | N/A   | N/A |
|                      | CREA (mg/dL) | 0.4                         | 0.5  | 0.4  | 0.6  | 0.5  | 0.4  | 0.4   | N/A   | N/A   | N/A |
|                      | GLU (mg/dL)  | 126                         | 95   | 69   | 100  | 62   | 48   | 93    | N/A   | N/A   | N/A |
|                      | NA (mmol/L)  | 147                         | 148  | 150  | 148  | 147  | 147  | 147   | N/A   | N/A   | N/A |
|                      | K (mmol/L)   | 4.5                         | 3.7  | 3.8  | 3.3  | 3.7  | 3.7  | 3.5   | N/A   | N/A   | N/A |
|                      | CL (mmol/L)  | 113                         | 113  | 114  | 109  | 110  | 110  | 109   | N/A   | N/A   | N/A |
|                      | ALP (U/L)    | 796                         | 746  | 640  | 757  | 639  | 859  | 734   | N/A   | N/A   | N/A |
|                      | ALT (U/L)    | 28                          | 24   | 25   | 27   | 28   | 30   | 25    | N/A   | N/A   | N/A |
|                      | AST (U/L)    | 46                          | 21   | 21   | 24   | 33   | 32   | 20    | N/A   | N/A   | N/A |
|                      | TBIL (mg/dL) | 0.2                         | 0.1  | 0.1  | 0.1  | 0.1  | 0.2  | 0.1   | N/A   | N/A   | N/A |
|                      | LDH (U/L)    | 614                         | 202  | 234  | 240  | 511  | 423  | 213   | N/A   | N/A   | N/A |
|                      | CPK (U/L)    | 1299                        | 136  | 207  | 177  | 192  | 379  | 184   | N/A   | N/A   | N/A |
|                      | GGT (U/L)    | 65                          | 62   | 61   | 58   | 65   | 71   | 61    | N/A   | N/A   | N/A |
|                      | TPRO (g/dL)  | 5.9                         | 5.6  | 5.7  | 5.4  | 5.7  | 5.7  | 5.2   | N/A   | N/A   | N/A |
|                      | ALB (g/dL)   | 4.0                         | 3.8  | 3.9  | 3.8  | 3.8  | 4.0  | 3.6   | N/A   | N/A   | N/A |
|                      | GLOB (g/dL)  | 1.9                         | 1.8  | 1.8  | 1.6  | 1.9  | 1.7  | 1.6   | N/A   | N/A   | N/A |
|                      | A/G          | 2.11                        | 2.11 | 2.17 | 2.38 | 2.00 | 2.35 | 2.25  | N/A   | N/A   | N/A |
|                      | CA (mg/dL)   | 9.7                         | 9.4  | 9.4  | 9.3  | 9.2  | 9.1  | 9.2   | N/A   | N/A   | N/A |
|                      | PHOS (mg/dL) | 6.9                         | 6.3  | 7.6  | 6.2  | 6.8  | 7.6  | 6.8   | N/A   | N/A   | N/A |
|                      | ALD (U/L)    | 46.6                        | 17.7 | 15.5 | 19.0 | 31.5 | 26.0 | 15.4  | N/A   | N/A   | N/A |
|                      | CKMM (U/L)   | 1135                        | 54   | 122  | 82   | 104  | 282  | 85    | N/A   | N/A   | N/A |
|                      | CKM% (%)     | 87.4                        | 39.4 | 58.9 | 46.6 | 54.2 | 74.3 | 46.0  | N/A   | N/A   | N/A |
| CKMB (U/L)           | 99           | 39                          | 45   | 31   | 26   | 37   | 47   | N/A   | N/A   | N/A   |     |
| CMB% (%)             | 7.6          | 28.7                        | 21.8 | 17.3 | 13.7 | 9.7  | 25.3 | N/A   | N/A   | N/A   |     |
| CKBB (U/L)           | 64           | 43                          | 40   | 64   | 62   | 61   | 53   | N/A   | N/A   | N/A   |     |
| CKB% (%)             | 4.9          | 31.9                        | 19.2 | 36.1 | 32.2 | 16.1 | 28.8 | N/A   | N/A   | N/A   |     |
| COMMENT              | HEM          | N/A                         | N/A  | N/A  | N/A  | N/A  | N/A  | N/A   | N/A   | N/A   |     |

|                                                         | Group (Necropsy Day)        | Group 5 (Necropsy Day 180±5) |       |       |       |       |       |       |       |       |       |
|---------------------------------------------------------|-----------------------------|------------------------------|-------|-------|-------|-------|-------|-------|-------|-------|-------|
|                                                         | Animal ID (Sex)             | 18-159 (Male)                |       |       |       |       |       |       |       |       |       |
|                                                         | Treatment (Dose)            | ITFFB (N/A)                  |       |       |       |       |       |       |       |       |       |
|                                                         | Study Day                   | BL                           | 0     | 7±1   | 14±2  | 28±3  | 60±3  | 90±4  | 120±4 | 150±4 | 180±5 |
| Complete Blood Counts (Hematology) & Plasma Coagulation | WBC (10 <sup>3</sup> /μL)   | 10.05                        | 9.68  | 6.72  | 11.32 | 10.09 | 10.00 | 9.66  | 9.65  | 9.02  | 7.01  |
|                                                         | RBC (10 <sup>6</sup> /μL)   | 5.99                         | 5.42  | 5.55  | 5.63  | 5.56  | 5.61  | 5.91  | 5.85  | 5.85  | 5.96  |
|                                                         | HB (g/dL)                   | 13.9                         | 12.8  | 12.7  | 13.0  | 13.1  | 12.9  | 13.6  | 13.3  | 13.3  | 13.7  |
|                                                         | HCT (%)                     | 46.4                         | 41.9  | 42.9  | 44.1  | 43.1  | 43.2  | 44.5  | 44.1  | 45.4  | 45.8  |
|                                                         | MCV (fL)                    | 77.4                         | 77.2  | 77.3  | 78.4  | 77.6  | 77.0  | 75.3  | 75.4  | 77.6  | 76.7  |
|                                                         | MCH (pg)                    | 23.3                         | 23.7  | 22.9  | 23.1  | 23.5  | 22.9  | 23.0  | 22.8  | 22.8  | 23.0  |
|                                                         | MCHC (g/dL)                 | 30.1                         | 30.7  | 29.6  | 29.5  | 30.3  | 29.8  | 30.5  | 30.2  | 29.4  | 30.0  |
|                                                         | PLT (10 <sup>3</sup> /μL)   | 347                          | 178   | 379   | 408   | 385   | 338   | 373   | 385   | 384   | 343   |
|                                                         | NEU% (%)                    | 67.5                         | 24.8  | 37.2  | 39.7  | 27.3  | 34.9  | 25.8  | 31.5  | 30.0  | 31.9  |
|                                                         | NEU (10 <sup>3</sup> /μL)   | 6.78                         | 2.40  | 2.50  | 4.49  | 2.76  | 3.49  | 2.49  | 3.04  | 2.70  | 2.24  |
|                                                         | LYMPH% (%)                  | 29.2                         | 63.8  | 57.2  | 53.7  | 64.7  | 58.3  | 69.0  | 63.5  | 63.0  | 62.7  |
|                                                         | LYMPH (10 <sup>3</sup> /μL) | 2.93                         | 6.18  | 3.84  | 6.08  | 6.53  | 5.83  | 6.66  | 6.13  | 5.68  | 4.40  |
|                                                         | MONO% (%)                   | 2.1                          | 4.5   | 2.6   | 4.2   | 3.4   | 2.4   | 2.0   | 1.9   | 2.8   | 2.2   |
|                                                         | MONO (10 <sup>3</sup> /μL)  | 0.21                         | 0.44  | 0.17  | 0.47  | 0.34  | 0.24  | 0.19  | 0.18  | 0.25  | 0.15  |
|                                                         | EOS% (%)                    | 0.4                          | 2.4   | 1.0   | 0.6   | 1.8   | 2.9   | 1.0   | 1.3   | 2.8   | 1.2   |
|                                                         | EOS (10 <sup>3</sup> /μL)   | 0.04                         | 0.23  | 0.07  | 0.07  | 0.19  | 0.29  | 0.10  | 0.12  | 0.25  | 0.08  |
|                                                         | BAS% (%)                    | 0.2                          | 1.0   | 0.6   | 0.4   | 0.7   | 0.5   | 0.6   | 0.5   | 0.5   | 0.6   |
|                                                         | BAS (10 <sup>3</sup> /μL)   | 0.02                         | 0.10  | 0.04  | 0.04  | 0.07  | 0.05  | 0.05  | 0.04  | 0.04  | 0.04  |
|                                                         | LUC% (%)                    | 0.6                          | 3.4   | 1.5   | 1.4   | 2.0   | 1.0   | 1.7   | 1.4   | 1.0   | 1.4   |
|                                                         | LUC (10 <sup>3</sup> /μL)   | 0.06                         | 0.33  | 0.10  | 0.16  | 0.20  | 0.10  | 0.17  | 0.14  | 0.09  | 0.10  |
|                                                         | MAC                         | +                            | +     | +     | +     | +     | +     | +     | +     | +     | +     |
|                                                         | LPLT                        | N/A                          | N/A   | N/A   | N/A   | N/A   | N/A   | N/A   | N/A   | N/A   | N/A   |
|                                                         | CPLT                        | +                            | N/A   | +     | +     | +     | +     | N/A   | N/A   | N/A   | N/A   |
|                                                         | ANIS                        | N/A                          | N/A   | N/A   | N/A   | N/A   | N/A   | N/A   | N/A   | N/A   | N/A   |
|                                                         | ATYP                        | N/A                          | N/A   | N/A   | N/A   | N/A   | N/A   | N/A   | N/A   | N/A   | N/A   |
| COMMENT                                                 | N/A                         | N/A                          | N/A   | HEM   | N/A   | N/A   | N/A   | N/A   | N/A   | N/A   |       |
| PT (sec)                                                | 11.0                        | 11.1                         | 10.7  | 11.0  | 10.8  | 11.0  | 11.6  | 11.6  | 11.1  | 11.0  |       |
| APTT (sec)                                              | 21.1                        | 21.8                         | 20.6  | 21.9  | 21.9  | 22.6  | 23.3  | 23.2  | 22.3  | 21.7  |       |
| FIB (mg/dL)                                             | 179                         | 226                          | 206   | 163   | 189   | 185   | 177   | 191   | 216   | 181   |       |
| DIME (ng/mL)                                            | 271.2                       | 289.3                        | 221.9 | 1649. | 303.3 | 321.2 | 356.5 | 343.8 | 302.8 | 259.0 |       |
| FDP (FEU)                                               | <2.5                        | <2.5                         | <2.5  | 5.0   | <2.5  | <2.5  | <2.5  | <2.5  | <2.5  | <2.5  |       |

| Group (Necropsy Day) |              | Group 5 (Necropsy Day 180±5) |      |      |      |      |      |       |       |       |      |
|----------------------|--------------|------------------------------|------|------|------|------|------|-------|-------|-------|------|
| Animal ID (Sex)      |              | 18-159 (Male)                |      |      |      |      |      |       |       |       |      |
| Treatment (Dose)     |              | ITFFB (N/A)                  |      |      |      |      |      |       |       |       |      |
| Study Day            | BL           | 0                            | 7±1  | 14±2 | 28±3 | 60±3 | 90±4 | 120±4 | 150±4 | 180±5 |      |
| Serum Chemistry      | BUN (mg/dL)  | 27                           | 28   | 21   | 27   | 22   | 23   | 20    | 22    | 25    | 19   |
|                      | CREA (mg/dL) | 0.5                          | 0.4  | 0.4  | 0.5  | 0.3  | 0.4  | 0.4   | 0.4   | 0.5   | 0.4  |
|                      | GLU (mg/dL)  | 84                           | 119  | 106  | 80   | 134  | 67   | 85    | 80    | 93    | 114  |
|                      | NA (mmol/L)  | 149                          | 146  | 148  | 148  | 144  | 145  | 146   | 149   | 147   | 147  |
|                      | K (mmol/L)   | 3.8                          | 3.8  | 3.3  | 3.3  | 3.1  | 3.3  | 3.1   | 3.2   | 3.6   | 3.4  |
|                      | CL (mmol/L)  | 113                          | 105  | 110  | 105  | 106  | 105  | 107   | 107   | 105   | 109  |
|                      | ALP (U/L)    | 682                          | 651  | 560  | 756  | 703  | 912  | 755   | 703   | 656   | 643  |
|                      | ALT (U/L)    | 31                           | 22   | 21   | 23   | 22   | 22   | 22    | 26    | 23    | 25   |
|                      | AST (U/L)    | 34                           | 38   | 25   | 30   | 20   | 24   | 18    | 24    | 23    | 21   |
|                      | TBIL (mg/dL) | 0.2                          | 0.2  | 0.2  | 0.2  | 0.1  | 0.2  | 0.2   | 0.2   | 0.2   | 0.2  |
|                      | LDH (U/L)    | 325                          | 429  | 268  | 319  | 239  | 251  | 222   | 268   | 299   | 251  |
|                      | CPK (U/L)    | 193                          | 1099 | 280  | 381  | 185  | 128  | 154   | 138   | 241   | 155  |
|                      | GGT (U/L)    | 71                           | 66   | 64   | 69   | 74   | 85   | 79    | 87    | 86    | 74   |
|                      | TPRO (g/dL)  | 6.4                          | 5.6  | 6.2  | 6.1  | 5.8  | 6.0  | 5.8   | 6.2   | 6.4   | 5.9  |
|                      | ALB (g/dL)   | 4.0                          | 3.8  | 3.9  | 3.9  | 3.6  | 3.8  | 3.8   | 4.1   | 4.0   | 3.9  |
|                      | GLOB (g/dL)  | 2.4                          | 1.8  | 2.3  | 2.2  | 2.2  | 2.2  | 2.0   | 2.1   | 2.4   | 2.0  |
|                      | A/G          | 1.67                         | 2.11 | 1.70 | 1.77 | 1.64 | 1.73 | 1.90  | 1.95  | 1.67  | 1.95 |
|                      | CA (mg/dL)   | 9.7                          | 10.1 | 10.0 | 10.1 | 9.5  | 9.5  | 9.5   | 9.9   | 10.3  | 9.7  |
|                      | PHOS (mg/dL) | 6.7                          | 6.5  | 6.2  | 6.7  | 5.7  | 6.6  | 5.9   | 5.8   | 5.4   | 5.1  |
|                      | ALD (U/L)    | 25.3                         | 32.8 | 17.5 | 26.0 | 18.8 | 14.0 | 13.0  | 17.9  | 17.1  | 13.6 |
|                      | CKMM (U/L)   | 133                          | 928  | 212  | 279  | 102  | 57   | 63    | 83    | 162   | 97   |
|                      | CKM% (%)     | 69.0                         | 84.4 | 75.7 | 73.1 | 55.2 | 44.5 | 41.2  | 60.5  | 67.2  | 62.4 |
|                      | CKMB (U/L)   | 34                           | 75   | 38   | 36   | 40   | 27   | 49    | 23    | 34    | 29   |
| CMB% (%)             | 17.8         | 6.8                          | 13.7 | 9.5  | 21.6 | 21.4 | 31.5 | 16.9  | 14.3  | 18.7  |      |
| CKBB (U/L)           | 25           | 97                           | 30   | 66   | 43   | 44   | 42   | 31    | 45    | 29    |      |
| CKB% (%)             | 13.2         | 8.8                          | 10.6 | 17.4 | 23.2 | 34.1 | 27.3 | 22.6  | 18.5  | 18.9  |      |
| COMMENT              | N/A          | HEM                          | N/A  | N/A  | N/A  | N/A  | N/A  | N/A   | N/A   | N/A   |      |

|                                                         | Group (Necropsy Day)        | Group 2 (Necropsy Day 90±4)                           |       |       |       |       |       |       |       |       |     |
|---------------------------------------------------------|-----------------------------|-------------------------------------------------------|-------|-------|-------|-------|-------|-------|-------|-------|-----|
|                                                         | Animal ID (Sex)             | 18-091 (Male)                                         |       |       |       |       |       |       |       |       |     |
|                                                         | Treatment (Dose)            | GTP-206 (4.5 x 10 <sup>12</sup> GC/Animal – Low Dose) |       |       |       |       |       |       |       |       |     |
| Study Day                                               | BL                          | 0                                                     | 7±1   | 14±2  | 28±3  | 60±3  | 90±4  | 120±4 | 150±4 | 180±5 |     |
| Complete Blood Counts (Hematology) & Plasma Coagulation | WBC (10 <sup>3</sup> /μL)   | 6.60                                                  | 6.93  | 7.84  | 9.01  | 7.08  | 6.98  | 8.16  | N/A   | N/A   | N/A |
|                                                         | RBC (10 <sup>6</sup> /μL)   | 6.04                                                  | 5.89  | 5.91  | 6.15  | 6.04  | 6.35  | 6.37  | N/A   | N/A   | N/A |
|                                                         | HB (g/dL)                   | 12.7                                                  | 13.0  | 12.6  | 12.9  | 12.9  | 13.5  | 13.0  | N/A   | N/A   | N/A |
|                                                         | HCT (%)                     | 43.0                                                  | 42.2  | 42.4  | 44.0  | 43.2  | 45.5  | 44.7  | N/A   | N/A   | N/A |
|                                                         | MCV (fL)                    | 71.3                                                  | 71.6  | 71.7  | 71.6  | 71.5  | 71.7  | 70.2  | N/A   | N/A   | N/A |
|                                                         | MCH (pg)                    | 21.0                                                  | 22.1  | 21.2  | 21.0  | 21.3  | 21.2  | 20.5  | N/A   | N/A   | N/A |
|                                                         | MCHC (g/dL)                 | 29.5                                                  | 30.8  | 29.6  | 29.3  | 29.8  | 29.6  | 29.2  | N/A   | N/A   | N/A |
|                                                         | PLT (10 <sup>3</sup> /μL)   | 407                                                   | 436   | 364   | 473   | 306   | 429   | 375   | N/A   | N/A   | N/A |
|                                                         | NEU% (%)                    | 30.4                                                  | 26.4  | 48.7  | 26.2  | 21.8  | 20.7  | 51.2  | N/A   | N/A   | N/A |
|                                                         | NEU (10 <sup>3</sup> /μL)   | 2.01                                                  | 1.83  | 3.82  | 2.37  | 1.54  | 1.44  | 4.18  | N/A   | N/A   | N/A |
|                                                         | LYMPH% (%)                  | 62.4                                                  | 64.1  | 46.7  | 67.8  | 70.0  | 72.5  | 45.1  | N/A   | N/A   | N/A |
|                                                         | LYMPH (10 <sup>3</sup> /μL) | 4.12                                                  | 4.44  | 3.66  | 6.11  | 4.95  | 5.06  | 3.69  | N/A   | N/A   | N/A |
|                                                         | MONO% (%)                   | 2.1                                                   | 3.6   | 2.0   | 2.1   | 3.1   | 2.2   | 1.5   | N/A   | N/A   | N/A |
|                                                         | MONO (10 <sup>3</sup> /μL)  | 0.14                                                  | 0.25  | 0.16  | 0.19  | 0.22  | 0.15  | 0.12  | N/A   | N/A   | N/A |
|                                                         | EOS% (%)                    | 2.9                                                   | 3.7   | 0.4   | 1.8   | 2.8   | 2.7   | 0.5   | N/A   | N/A   | N/A |
|                                                         | EOS (10 <sup>3</sup> /μL)   | 0.19                                                  | 0.26  | 0.03  | 0.16  | 0.20  | 0.19  | 0.04  | N/A   | N/A   | N/A |
|                                                         | BAS% (%)                    | 0.8                                                   | 0.6   | 0.6   | 1.0   | 0.7   | 0.7   | 0.4   | N/A   | N/A   | N/A |
|                                                         | BAS (10 <sup>3</sup> /μL)   | 0.05                                                  | 0.04  | 0.04  | 0.09  | 0.05  | 0.05  | 0.04  | N/A   | N/A   | N/A |
|                                                         | LUC% (%)                    | 1.4                                                   | 1.6   | 1.5   | 1.1   | 1.6   | 1.3   | 1.3   | N/A   | N/A   | N/A |
|                                                         | LUC (10 <sup>3</sup> /μL)   | 0.09                                                  | 0.11  | 0.12  | 0.10  | 0.11  | 0.09  | 0.10  | N/A   | N/A   | N/A |
|                                                         | MAC                         | N/A                                                   | N/A   | N/A   | N/A   | N/A   | N/A   | N/A   | N/A   | N/A   | N/A |
|                                                         | LPLT                        | N/A                                                   | N/A   | N/A   | N/A   | N/A   | N/A   | N/A   | N/A   | N/A   | N/A |
|                                                         | CPLT                        | N/A                                                   | N/A   | N/A   | N/A   | +     | N/A   | N/A   | N/A   | N/A   | N/A |
|                                                         | ANIS                        | N/A                                                   | N/A   | N/A   | N/A   | N/A   | N/A   | N/A   | N/A   | N/A   | N/A |
| ATYP                                                    | N/A                         | N/A                                                   | N/A   | N/A   | N/A   | N/A   | N/A   | N/A   | N/A   | N/A   |     |
| COMMENT                                                 | N/A                         | N/A                                                   | HEM   | N/A   | N/A   | N/A   | N/A   | N/A   | N/A   | N/A   |     |
| PT (sec)                                                | 11.9                        | 11.2                                                  | 10.8  | 10.8  | 10.7  | 11.3  | 11.4  | N/A   | N/A   | N/A   |     |
| APTT (sec)                                              | 22.0                        | 23.5                                                  | 21.3  | 22.4  | 22.3  | 22.5  | 23.1  | N/A   | N/A   | N/A   |     |
| FIB (mg/dL)                                             | 89                          | 174                                                   | 208   | 172   | 187   | 166   | 161   | N/A   | N/A   | N/A   |     |
| DIME (ng/mL)                                            | 226.9                       | 215.8                                                 | 175.0 | 131.5 | 281.4 | 173.4 | 165.3 | N/A   | N/A   | N/A   |     |
| FDP (FEU)                                               | <2.5                        | <2.5                                                  | <2.5  | <2.5  | 2.5   | 2.5   | 2.5   | N/A   | N/A   | N/A   |     |

| <b>Group (Necropsy Day)</b> |           | <b>Group 2 (Necropsy Day 90±4)</b>                          |            |             |             |             |             |              |              |              |
|-----------------------------|-----------|-------------------------------------------------------------|------------|-------------|-------------|-------------|-------------|--------------|--------------|--------------|
| <b>Animal ID (Sex)</b>      |           | <b>18-091 (Male)</b>                                        |            |             |             |             |             |              |              |              |
| <b>Treatment (Dose)</b>     |           | <b>GTP-206 (4.5 x 10<sup>12</sup> GC/Animal – Low Dose)</b> |            |             |             |             |             |              |              |              |
| <b>Study Day</b>            | <b>BL</b> | <b>0</b>                                                    | <b>7±1</b> | <b>14±2</b> | <b>28±3</b> | <b>60±3</b> | <b>90±4</b> | <b>120±4</b> | <b>150±4</b> | <b>180±5</b> |
| <b>BUN (mg/dL)</b>          | 24        | 18                                                          | 25         | 21          | 18          | 19          | 18          | N/A          | N/A          | N/A          |
| <b>CREA (mg/dL)</b>         | 0.4       | 0.4                                                         | 0.5        | 0.4         | 0.4         | 0.3         | 0.3         | N/A          | N/A          | N/A          |
| <b>GLU (mg/dL)</b>          | 123       | 85                                                          | 96         | 111         | 92          | 109         | 96          | N/A          | N/A          | N/A          |
| <b>NA (mmol/L)</b>          | 146       | 144                                                         | 148        | 147         | 145         | 145         | 149         | N/A          | N/A          | N/A          |
| <b>K (mmol/L)</b>           | 3.4       | 3.4                                                         | 3.6        | 3.1         | 3.3         | 3.3         | 3.4         | N/A          | N/A          | N/A          |
| <b>CL (mmol/L)</b>          | 110       | 107                                                         | 110        | 107         | 109         | 108         | 111         | N/A          | N/A          | N/A          |
| <b>ALP (U/L)</b>            | 733       | 610                                                         | 641        | 557         | 609         | 759         | 690         | N/A          | N/A          | N/A          |
| <b>ALT (U/L)</b>            | 28        | 26                                                          | 21         | 23          | 26          | 21          | 23          | N/A          | N/A          | N/A          |
| <b>AST (U/L)</b>            | 26        | 31                                                          | 24         | 23          | 25          | 27          | 26          | N/A          | N/A          | N/A          |
| <b>TBIL (mg/dL)</b>         | 0.1       | 0.2                                                         | 0.2        | 0.1         | 0.1         | 0.1         | 0.1         | N/A          | N/A          | N/A          |
| <b>LDH (U/L)</b>            | 248       | 313                                                         | 232        | 198         | 201         | 268         | 194         | N/A          | N/A          | N/A          |
| <b>CPK (U/L)</b>            | 141       | 234                                                         | 182        | 120         | 164         | 212         | 384         | N/A          | N/A          | N/A          |
| <b>GGT (U/L)</b>            | 96        | 92                                                          | 94         | 85          | 89          | 98          | 87          | N/A          | N/A          | N/A          |
| <b>TPRO (g/dL)</b>          | 6.0       | 5.8                                                         | 6.3        | 6.1         | 6.0         | 6.1         | 5.7         | N/A          | N/A          | N/A          |
| <b>ALB (g/dL)</b>           | 3.9       | 4.0                                                         | 4.0        | 4.0         | 3.8         | 3.9         | 3.7         | N/A          | N/A          | N/A          |
| <b>GLOB (g/dL)</b>          | 2.1       | 1.8                                                         | 2.3        | 2.1         | 2.2         | 2.2         | 2.0         | N/A          | N/A          | N/A          |
| <b>A/G</b>                  | 1.86      | 2.22                                                        | 1.74       | 1.90        | 1.73        | 1.77        | 1.85        | N/A          | N/A          | N/A          |
| <b>CA (mg/dL)</b>           | 9.5       | 9.7                                                         | 10.0       | 9.8         | 9.2         | 9.4         | 9.3         | N/A          | N/A          | N/A          |
| <b>PHOS (mg/dL)</b>         | 5.2       | 6.1                                                         | 5.8        | 6.0         | 5.9         | 5.9         | 6.4         | N/A          | N/A          | N/A          |
| <b>ALD (U/L)</b>            | 15.3      | 20.3                                                        | 10.3       | 12.6        | 12.3        | 14.8        | 12.2        | N/A          | N/A          | N/A          |
| <b>CKMM (U/L)</b>           | 95        | 152                                                         | 116        | 54          | 92          | 126         | 297         | N/A          | N/A          | N/A          |
| <b>CKM% (%)</b>             | 67.2      | 64.8                                                        | 63.9       | 45.4        | 56.3        | 59.3        | 77.3        | N/A          | N/A          | N/A          |
| <b>CKMB (U/L)</b>           | 26        | 33                                                          | 33         | 32          | 31          | 40          | 45          | N/A          | N/A          | N/A          |
| <b>CMB% (%)</b>             | 18.6      | 14.2                                                        | 18.4       | 26.4        | 19.1        | 18.8        | 11.6        | N/A          | N/A          | N/A          |
| <b>CKBB (U/L)</b>           | 20        | 49                                                          | 32         | 34          | 41          | 46          | 43          | N/A          | N/A          | N/A          |
| <b>CKB% (%)</b>             | 14.2      | 21.0                                                        | 17.8       | 28.2        | 24.7        | 21.8        | 11.2        | N/A          | N/A          | N/A          |
| <b>COMMENT</b>              | N/A       | N/A                                                         | N/A        | N/A         | N/A         | N/A         | N/A         | N/A          | N/A          | N/A          |

Serum Chemistry

|                                                         | Group (Necropsy Day)        | Group 2 (Necropsy Day 90±4)                           |       |       |       |       |       |       |       |       |     |
|---------------------------------------------------------|-----------------------------|-------------------------------------------------------|-------|-------|-------|-------|-------|-------|-------|-------|-----|
|                                                         | Animal ID (Sex)             | 18-168 (Female)                                       |       |       |       |       |       |       |       |       |     |
|                                                         | Treatment (Dose)            | GTP-206 (4.5 x 10 <sup>12</sup> GC/Animal – Low Dose) |       |       |       |       |       |       |       |       |     |
| Study Day                                               | BL                          | 0                                                     | 7±1   | 14±2  | 28±3  | 60±3  | 90±4  | 120±4 | 150±4 | 180±5 |     |
| Complete Blood Counts (Hematology) & Plasma Coagulation | WBC (10 <sup>3</sup> /μL)   | 14.36                                                 | 8.47  | 12.23 | 13.30 | 13.33 | 11.64 | 9.96  | N/A   | N/A   | N/A |
|                                                         | RBC (10 <sup>6</sup> /μL)   | 5.65                                                  | 5.35  | 5.36  | 5.07  | 5.62  | 5.63  | 5.23  | N/A   | N/A   | N/A |
|                                                         | HB (g/dL)                   | 13.0                                                  | 12.4  | 12.2  | 11.7  | 13.0  | 12.8  | 12.0  | N/A   | N/A   | N/A |
|                                                         | HCT (%)                     | 44.6                                                  | 41.3  | 41.4  | 39.5  | 43.7  | 43.5  | 40.0  | N/A   | N/A   | N/A |
|                                                         | MCV (fL)                    | 78.9                                                  | 77.1  | 77.2  | 77.8  | 77.7  | 77.3  | 76.4  | N/A   | N/A   | N/A |
|                                                         | MCH (pg)                    | 23.0                                                  | 23.2  | 22.8  | 23.1  | 23.2  | 22.8  | 22.9  | N/A   | N/A   | N/A |
|                                                         | MCHC (g/dL)                 | 29.2                                                  | 30.1  | 29.5  | 29.6  | 29.8  | 29.5  | 30.0  | N/A   | N/A   | N/A |
|                                                         | PLT (10 <sup>3</sup> /μL)   | 402                                                   | 420   | 360   | 380   | 360   | 357   | 313   | N/A   | N/A   | N/A |
|                                                         | NEU% (%)                    | 54.2                                                  | 29.0  | 37.5  | 59.8  | 56.2  | 57.3  | 56.5  | N/A   | N/A   | N/A |
|                                                         | NEU (10 <sup>3</sup> /μL)   | 7.79                                                  | 2.46  | 4.58  | 7.96  | 7.50  | 6.67  | 5.62  | N/A   | N/A   | N/A |
|                                                         | LYMPH% (%)                  | 41.0                                                  | 61.5  | 52.9  | 34.9  | 36.7  | 37.1  | 38.5  | N/A   | N/A   | N/A |
|                                                         | LYMPH (10 <sup>3</sup> /μL) | 5.89                                                  | 5.21  | 6.47  | 4.65  | 4.90  | 4.32  | 3.83  | N/A   | N/A   | N/A |
|                                                         | MONO% (%)                   | 1.5                                                   | 2.1   | 4.8   | 3.2   | 3.5   | 1.9   | 1.4   | N/A   | N/A   | N/A |
|                                                         | MONO (10 <sup>3</sup> /μL)  | 0.21                                                  | 0.18  | 0.59  | 0.42  | 0.47  | 0.23  | 0.14  | N/A   | N/A   | N/A |
|                                                         | EOS% (%)                    | 1.9                                                   | 5.0   | 3.0   | 1.1   | 2.1   | 2.4   | 2.3   | N/A   | N/A   | N/A |
|                                                         | EOS (10 <sup>3</sup> /μL)   | 0.28                                                  | 0.42  | 0.37  | 0.15  | 0.28  | 0.28  | 0.22  | N/A   | N/A   | N/A |
|                                                         | BAS% (%)                    | 0.6                                                   | 0.8   | 0.7   | 0.4   | 0.7   | 0.4   | 0.6   | N/A   | N/A   | N/A |
|                                                         | BAS (10 <sup>3</sup> /μL)   | 0.08                                                  | 0.06  | 0.08  | 0.06  | 0.09  | 0.04  | 0.06  | N/A   | N/A   | N/A |
|                                                         | LUC% (%)                    | 0.8                                                   | 1.6   | 1.1   | 0.5   | 0.8   | 0.9   | 0.8   | N/A   | N/A   | N/A |
|                                                         | LUC (10 <sup>3</sup> /μL)   | 0.12                                                  | 0.14  | 0.14  | 0.07  | 0.10  | 0.10  | 0.08  | N/A   | N/A   | N/A |
|                                                         | MAC                         | +                                                     | +     | +     | +     | +     | +     | +     | N/A   | N/A   | N/A |
|                                                         | LPLT                        | N/A                                                   | N/A   | N/A   | N/A   | N/A   | N/A   | N/A   | N/A   | N/A   | N/A |
|                                                         | CPLT                        | N/A                                                   | N/A   | +     | +     | +     | N/A   | +     | N/A   | N/A   | N/A |
| ANIS                                                    | N/A                         | N/A                                                   | N/A   | N/A   | N/A   | N/A   | N/A   | N/A   | N/A   | N/A   |     |
| ATYP                                                    | N/A                         | N/A                                                   | N/A   | N/A   | N/A   | N/A   | N/A   | N/A   | N/A   | N/A   |     |
| COMMENT                                                 | N/A                         | N/A                                                   | HEM   | N/A   | N/A   | N/A   | N/A   | N/A   | N/A   | N/A   |     |
| PT (sec)                                                | 10.8                        | 11.1                                                  | 10.9  | 10.9  | 10.5  | 11.1  | 11.4  | N/A   | N/A   | N/A   |     |
| APTT (sec)                                              | 20.9                        | 21.5                                                  | 21.7  | 21.2  | 20.9  | 21.5  | 21.4  | N/A   | N/A   | N/A   |     |
| FIB (mg/dL)                                             | 172                         | 179                                                   | 140   | 157   | 189   | 172   | 158   | N/A   | N/A   | N/A   |     |
| DIME (ng/mL)                                            | 259.8                       | 188.4                                                 | 279.7 | 168.8 | 243.3 | 189.7 | 156.4 | N/A   | N/A   | N/A   |     |
| FDP (FEU)                                               | <2.5                        | <2.5                                                  | <2.5  | <2.5  | <2.5  | <2.5  | <2.5  | N/A   | N/A   | N/A   |     |



| Group (Necropsy Day) |              | Group 2 (Necropsy Day 90±4)                           |      |      |      |      |      |       |       |       |     |
|----------------------|--------------|-------------------------------------------------------|------|------|------|------|------|-------|-------|-------|-----|
| Animal ID (Sex)      |              | 18-168 (Female)                                       |      |      |      |      |      |       |       |       |     |
| Treatment (Dose)     |              | GTP-206 (4.5 x 10 <sup>12</sup> GC/Animal – Low Dose) |      |      |      |      |      |       |       |       |     |
| Study Day            | BL           | 0                                                     | 7±1  | 14±2 | 28±3 | 60±3 | 90±4 | 120±4 | 150±4 | 180±5 |     |
| Serum Chemistry      | BUN (mg/dL)  | 26                                                    | 22   | 19   | 20   | 23   | 23   | 20    | N/A   | N/A   | N/A |
|                      | CREA (mg/dL) | 0.5                                                   | 0.4  | 0.4  | 0.5  | 0.4  | 0.4  | 0.4   | N/A   | N/A   | N/A |
|                      | GLU (mg/dL)  | 91                                                    | 81   | 66   | 65   | 65   | 57   | 97    | N/A   | N/A   | N/A |
|                      | NA (mmol/L)  | 149                                                   | 148  | 147  | 150  | 147  | 147  | 149   | N/A   | N/A   | N/A |
|                      | K (mmol/L)   | 3.4                                                   | 3.7  | 3.6  | 3.3  | 3.7  | 3.4  | 3.8   | N/A   | N/A   | N/A |
|                      | CL (mmol/L)  | 107                                                   | 109  | 110  | 109  | 109  | 109  | 111   | N/A   | N/A   | N/A |
|                      | ALP (U/L)    | 584                                                   | 604  | 537  | 661  | 579  | 602  | 522   | N/A   | N/A   | N/A |
|                      | ALT (U/L)    | 34                                                    | 29   | 23   | 31   | 35   | 30   | 28    | N/A   | N/A   | N/A |
|                      | AST (U/L)    | 31                                                    | 33   | 37   | 33   | 31   | 29   | 27    | N/A   | N/A   | N/A |
|                      | TBIL (mg/dL) | 0.1                                                   | 0.1  | 0.2  | 0.2  | 0.2  | 0.2  | 0.1   | N/A   | N/A   | N/A |
|                      | LDH (U/L)    | 216                                                   | 238  | 328  | 214  | 222  | 185  | 217   | N/A   | N/A   | N/A |
|                      | CPK (U/L)    | 110                                                   | 833  | 1924 | 142  | 124  | 146  | 236   | N/A   | N/A   | N/A |
|                      | GGT (U/L)    | 54                                                    | 53   | 51   | 48   | 52   | 51   | 44    | N/A   | N/A   | N/A |
|                      | TPRO (g/dL)  | 6.4                                                   | 5.7  | 6.5  | 6.3  | 6.5  | 6.4  | 5.5   | N/A   | N/A   | N/A |
|                      | ALB (g/dL)   | 4.1                                                   | 4.1  | 4.1  | 4.3  | 4.1  | 4.1  | 3.6   | N/A   | N/A   | N/A |
|                      | GLOB (g/dL)  | 2.3                                                   | 1.6  | 2.4  | 2.0  | 2.4  | 2.3  | 1.9   | N/A   | N/A   | N/A |
|                      | A/G          | 1.78                                                  | 2.56 | 1.71 | 2.15 | 1.71 | 1.78 | 1.89  | N/A   | N/A   | N/A |
|                      | CA (mg/dL)   | 10.1                                                  | 9.9  | 9.6  | 9.8  | 9.8  | 9.4  | 9.1   | N/A   | N/A   | N/A |
|                      | PHOS (mg/dL) | 6.0                                                   | 6.9  | 7.2  | 6.9  | 5.8  | 5.1  | 6.4   | N/A   | N/A   | N/A |
|                      | ALD (U/L)    | 13.7                                                  | 20.2 | 35.1 | 17.0 | 15.2 | 13.3 | 13.0  | N/A   | N/A   | N/A |
|                      | CKMM (U/L)   | 63                                                    | 694  | 1716 | 78   | 68   | 85   | 141   | N/A   | N/A   | N/A |
|                      | CKM% (%)     | 57.2                                                  | 83.3 | 89.2 | 55.2 | 55.0 | 58.3 | 59.6  | N/A   | N/A   | N/A |
|                      | CKMB (U/L)   | 24                                                    | 67   | 100  | 35   | 28   | 32   | 47    | N/A   | N/A   | N/A |
| CMB% (%)             | 22.1         | 8.1                                                   | 5.2  | 24.7 | 22.6 | 22.1 | 19.8 | N/A   | N/A   | N/A   |     |
| CKBB (U/L)           | 23           | 72                                                    | 108  | 29   | 28   | 29   | 49   | N/A   | N/A   | N/A   |     |
| CKB% (%)             | 20.8         | 8.6                                                   | 5.6  | 20.1 | 22.3 | 19.6 | 20.6 | N/A   | N/A   | N/A   |     |
| COMMENT              | N/A          | N/A                                                   | N/A  | N/A  | N/A  | N/A  | N/A  | N/A   | N/A   | N/A   |     |

|                                                         | Group (Necropsy Day)        | Group 2 (Necropsy Day 90±4)                           |       |       |        |       |       |       |       |       |     |
|---------------------------------------------------------|-----------------------------|-------------------------------------------------------|-------|-------|--------|-------|-------|-------|-------|-------|-----|
|                                                         | Animal ID (Sex)             | 18-173 (Female)                                       |       |       |        |       |       |       |       |       |     |
|                                                         | Treatment (Dose)            | GTP-206 (4.5 x 10 <sup>12</sup> GC/Animal – Low Dose) |       |       |        |       |       |       |       |       |     |
| Study Day                                               | BL                          | 0                                                     | 7±1   | 14±2  | 28±3   | 60±3  | 90±4  | 120±4 | 150±4 | 180±5 |     |
| Complete Blood Counts (Hematology) & Plasma Coagulation | WBC (10 <sup>3</sup> /μL)   | 19.06                                                 | 12.28 | 8.66  | 14.99  | 13.72 | 8.44  | CLOT  | N/A   | N/A   | N/A |
|                                                         | RBC (10 <sup>6</sup> /μL)   | 5.42                                                  | 5.07  | 5.37  | 5.08   | 5.30  | 5.45  | CLOT  | N/A   | N/A   | N/A |
|                                                         | HB (g/dL)                   | 12.5                                                  | 11.9  | 12.2  | 11.6   | 12.1  | 12.1  | CLOT  | N/A   | N/A   | N/A |
|                                                         | HCT (%)                     | 41.5                                                  | 38.5  | 41.3  | 39.1   | 39.9  | 41.1  | CLOT  | N/A   | N/A   | N/A |
|                                                         | MCV (fL)                    | 76.6                                                  | 76.0  | 76.9  | 76.9   | 75.3  | 75.4  | CLOT  | N/A   | N/A   | N/A |
|                                                         | MCH (pg)                    | 23.1                                                  | 23.5  | 22.6  | 22.8   | 22.9  | 22.2  | CLOT  | N/A   | N/A   | N/A |
|                                                         | MCHC (g/dL)                 | 30.2                                                  | 30.9  | 29.4  | 29.6   | 30.4  | 29.4  | CLOT  | N/A   | N/A   | N/A |
|                                                         | PLT (10 <sup>3</sup> /μL)   | 371                                                   | 415   | 479   | 386    | 241   | 345   | CLOT  | N/A   | N/A   | N/A |
|                                                         | NEU% (%)                    | 78.6                                                  | 66.9  | 39.4  | 80.3   | 73.3  | 46.3  | CLOT  | N/A   | N/A   | N/A |
|                                                         | NEU (10 <sup>3</sup> /μL)   | 14.99                                                 | 8.22  | 3.41  | 12.03  | 10.06 | 3.91  | CLOT  | N/A   | N/A   | N/A |
|                                                         | LYMPH% (%)                  | 16.9                                                  | 27.4  | 54.5  | 16.1   | 22.2  | 48.0  | CLOT  | N/A   | N/A   | N/A |
|                                                         | LYMPH (10 <sup>3</sup> /μL) | 3.23                                                  | 3.37  | 4.72  | 2.41   | 3.04  | 4.05  | CLOT  | N/A   | N/A   | N/A |
|                                                         | MONO% (%)                   | 2.6                                                   | 1.8   | 3.0   | 2.4    | 2.0   | 2.1   | CLOT  | N/A   | N/A   | N/A |
|                                                         | MONO (10 <sup>3</sup> /μL)  | 0.49                                                  | 0.22  | 0.26  | 0.37   | 0.27  | 0.18  | CLOT  | N/A   | N/A   | N/A |
|                                                         | EOS% (%)                    | 0.9                                                   | 2.6   | 1.1   | 0.3    | 0.8   | 2.2   | CLOT  | N/A   | N/A   | N/A |
|                                                         | EOS (10 <sup>3</sup> /μL)   | 0.16                                                  | 0.32  | 0.10  | 0.04   | 0.11  | 0.19  | CLOT  | N/A   | N/A   | N/A |
|                                                         | BAS% (%)                    | 0.4                                                   | 0.5   | 0.7   | 0.3    | 0.9   | 0.3   | CLOT  | N/A   | N/A   | N/A |
|                                                         | BAS (10 <sup>3</sup> /μL)   | 0.08                                                  | 0.06  | 0.06  | 0.05   | 0.12  | 0.03  | CLOT  | N/A   | N/A   | N/A |
|                                                         | LUC% (%)                    | 0.5                                                   | 0.8   | 1.3   | 0.6    | 0.8   | 1.0   | CLOT  | N/A   | N/A   | N/A |
|                                                         | LUC (10 <sup>3</sup> /μL)   | 0.10                                                  | 0.09  | 0.11  | 0.10   | 0.11  | 0.09  | CLOT  | N/A   | N/A   | N/A |
|                                                         | MAC                         | +                                                     | +     | +     | +      | +     | +     | N/A   | N/A   | N/A   | N/A |
|                                                         | LPLT                        | N/A                                                   | N/A   | N/A   | N/A    | N/A   | N/A   | N/A   | N/A   | N/A   | N/A |
|                                                         | CPLT                        | +                                                     | N/A   | N/A   | +      | +     | +     | N/A   | N/A   | N/A   | N/A |
| ANIS                                                    | N/A                         | N/A                                                   | N/A   | N/A   | N/A    | N/A   | N/A   | N/A   | N/A   | N/A   |     |
| ATYP                                                    | N/A                         | N/A                                                   | N/A   | N/A   | N/A    | N/A   | N/A   | N/A   | N/A   | N/A   |     |
| COMMENT                                                 | N/A                         | N/A                                                   | N/A   | N/A   | HEM    | N/A   | HEM   | N/A   | N/A   | N/A   |     |
| PT (sec)                                                | 10.3                        | 10.7                                                  | 10.2  | 10.3  | 10.6   | 10.7  | 10.7  | N/A   | N/A   | N/A   |     |
| APTT (sec)                                              | 19.3                        | 19.6                                                  | 19.7  | 19.7  | 19.2   | 20.5  | 20.6  | N/A   | N/A   | N/A   |     |
| FIB (mg/dL)                                             | 169                         | 189                                                   | 199   | 174   | 130    | 167   | 163   | N/A   | N/A   | N/A   |     |
| DIME (ng/mL)                                            | 356.3                       | 334.2                                                 | 390.5 | 449.5 | 3177.2 | 459.8 | 467.3 | N/A   | N/A   | N/A   |     |
| FDP (FEU)                                               | <2.5                        | <2.5                                                  | <2.5  | <2.5  | 10.0   | <2.5  | <2.5  | N/A   | N/A   | N/A   |     |

| Group (Necropsy Day) |              | Group 2 (Necropsy Day 90±4)                           |      |      |      |      |      |       |       |       |     |
|----------------------|--------------|-------------------------------------------------------|------|------|------|------|------|-------|-------|-------|-----|
| Animal ID (Sex)      |              | 18-173 (Female)                                       |      |      |      |      |      |       |       |       |     |
| Treatment (Dose)     |              | GTP-206 (4.5 x 10 <sup>12</sup> GC/Animal – Low Dose) |      |      |      |      |      |       |       |       |     |
| Study Day            | BL           | 0                                                     | 7±1  | 14±2 | 28±3 | 60±3 | 90±4 | 120±4 | 150±4 | 180±5 |     |
| Serum Chemistry      | BUN (mg/dL)  | 24                                                    | 24   | 22   | 20   | 21   | 19   | 15    | N/A   | N/A   | N/A |
|                      | CREA (mg/dL) | 0.4                                                   | 0.5  | 0.4  | 0.5  | 0.4  | 0.4  | 0.3   | N/A   | N/A   | N/A |
|                      | GLU (mg/dL)  | 116                                                   | 105  | 104  | 94   | 89   | 100  | 97    | N/A   | N/A   | N/A |
|                      | NA (mmol/L)  | 147                                                   | 147  | 147  | 150  | 146  | 146  | 149   | N/A   | N/A   | N/A |
|                      | K (mmol/L)   | 3.3                                                   | 2.9  | 3.3  | 2.9  | 3.1  | 3.2  | 3.3   | N/A   | N/A   | N/A |
|                      | CL (mmol/L)  | 108                                                   | 106  | 107  | 109  | 107  | 109  | 110   | N/A   | N/A   | N/A |
|                      | ALP (U/L)    | 632                                                   | 681  | 636  | 697  | 580  | 737  | 758   | N/A   | N/A   | N/A |
|                      | ALT (U/L)    | 26                                                    | 25   | 27   | 27   | 23   | 22   | 23    | N/A   | N/A   | N/A |
|                      | AST (U/L)    | 28                                                    | 28   | 27   | 28   | 26   | 27   | 29    | N/A   | N/A   | N/A |
|                      | TBIL (mg/dL) | 0.1                                                   | 0.2  | 0.2  | 0.2  | 0.2  | 0.2  | 0.2   | N/A   | N/A   | N/A |
|                      | LDH (U/L)    | 312                                                   | 248  | 251  | 241  | 259  | 258  | 285   | N/A   | N/A   | N/A |
|                      | CPK (U/L)    | 195                                                   | 197  | 285  | 135  | 74   | 307  | 623   | N/A   | N/A   | N/A |
|                      | GGT (U/L)    | 93                                                    | 97   | 96   | 90   | 89   | 106  | 101   | N/A   | N/A   | N/A |
|                      | TPRO (g/dL)  | 6.3                                                   | 5.7  | 6.5  | 6.4  | 6.2  | 6.1  | 5.9   | N/A   | N/A   | N/A |
|                      | ALB (g/dL)   | 3.8                                                   | 3.8  | 3.9  | 4.0  | 3.7  | 3.8  | 3.7   | N/A   | N/A   | N/A |
|                      | GLOB (g/dL)  | 2.5                                                   | 1.9  | 2.6  | 2.4  | 2.5  | 2.3  | 2.2   | N/A   | N/A   | N/A |
|                      | A/G          | 1.52                                                  | 2.00 | 1.50 | 1.67 | 1.48 | 1.65 | 1.68  | N/A   | N/A   | N/A |
|                      | CA (mg/dL)   | 9.9                                                   | 9.4  | 9.6  | 9.5  | 9.4  | 9.2  | 9.1   | N/A   | N/A   | N/A |
|                      | PHOS (mg/dL) | 4.8                                                   | 6.3  | 7.3  | 6.0  | 5.3  | 5.1  | 7.5   | N/A   | N/A   | N/A |
|                      | ALD (U/L)    | 24.2                                                  | 23.1 | 18.9 | 20.9 | 22.8 | 19.3 | 21.0  | N/A   | N/A   | N/A |
|                      | CKMM (U/L)   | 149                                                   | 133  | 199  | 76   | 36   | 227  | 483   | N/A   | N/A   | N/A |
|                      | CKM% (%)     | 76.5                                                  | 67.7 | 69.7 | 56.6 | 48.8 | 73.9 | 77.6  | N/A   | N/A   | N/A |
| CKMB (U/L)           | 29           | 35                                                    | 44   | 33   | 22   | 42   | 72   | N/A   | N/A   | N/A   |     |
| CMB% (%)             | 14.7         | 17.8                                                  | 15.3 | 24.5 | 29.3 | 13.6 | 11.5 | N/A   | N/A   | N/A   |     |
| CKBB (U/L)           | 17           | 29                                                    | 42   | 26   | 16   | 38   | 67   | N/A   | N/A   | N/A   |     |
| CKB% (%)             | 8.8          | 14.5                                                  | 14.9 | 19.0 | 21.9 | 12.5 | 10.8 | N/A   | N/A   | N/A   |     |
| COMMENT              | N/A          | N/A                                                   | N/A  | N/A  | N/A  | N/A  | N/A  | N/A   | N/A   | N/A   |     |

|                                                         | Group (Necropsy Day)        | Group 6 (Necropsy Day 180±5)                          |       |       |       |       |       |       |       |       |       |
|---------------------------------------------------------|-----------------------------|-------------------------------------------------------|-------|-------|-------|-------|-------|-------|-------|-------|-------|
|                                                         | Animal ID (Sex)             | 18-042 (Female)                                       |       |       |       |       |       |       |       |       |       |
|                                                         | Treatment (Dose)            | GTP-206 (4.5 x 10 <sup>12</sup> GC/Animal – Low Dose) |       |       |       |       |       |       |       |       |       |
|                                                         | Study Day                   | BL                                                    | 0     | 7±1   | 14±2  | 28±3  | 60±3  | 90±4  | 120±4 | 150±4 | 180±5 |
| Complete Blood Counts (Hematology) & Plasma Coagulation | WBC (10 <sup>3</sup> /μL)   | 7.34                                                  | 6.21  | 10.64 | 8.52  | 8.16  | 5.73  | 6.47  | 8.03  | 8.82  | 6.54  |
|                                                         | RBC (10 <sup>6</sup> /μL)   | 6.22                                                  | 5.96  | 5.74  | 5.60  | 5.98  | 6.18  | 6.01  | 6.10  | 5.94  | 6.19  |
|                                                         | HB (g/dL)                   | 13.5                                                  | 12.9  | 12.2  | 12.0  | 12.6  | 13.1  | 12.4  | 13.2  | 12.7  | 13.2  |
|                                                         | HCT (%)                     | 44.3                                                  | 43.7  | 41.1  | 40.4  | 43.3  | 43.5  | 42.2  | 43.5  | 42.0  | 43.3  |
|                                                         | MCV (fL)                    | 71.2                                                  | 73.3  | 71.5  | 72.3  | 72.5  | 70.4  | 70.1  | 71.3  | 70.8  | 69.9  |
|                                                         | MCH (pg)                    | 21.7                                                  | 21.7  | 21.2  | 21.4  | 21.0  | 21.2  | 20.7  | 21.6  | 21.4  | 21.4  |
|                                                         | MCHC (g/dL)                 | 30.5                                                  | 29.6  | 29.6  | 29.7  | 29.0  | 30.0  | 29.5  | 30.3  | 30.2  | 30.6  |
|                                                         | PLT (10 <sup>3</sup> /μL)   | 365                                                   | 358   | 374   | 397   | 360   | 334   | 359   | 341   | 348   | 334   |
|                                                         | NEU% (%)                    | 50.3                                                  | 37.0  | 83.6  | 82.6  | 69.1  | 43.9  | 67.5  | 59.0  | 54.5  | 47.2  |
|                                                         | NEU (10 <sup>3</sup> /μL)   | 3.69                                                  | 2.30  | 8.89  | 7.03  | 5.64  | 2.52  | 4.37  | 4.74  | 4.81  | 3.08  |
|                                                         | LYMPH% (%)                  | 43.2                                                  | 54.9  | 13.4  | 14.2  | 26.5  | 49.4  | 27.4  | 35.8  | 39.8  | 44.4  |
|                                                         | LYMPH (10 <sup>3</sup> /μL) | 3.17                                                  | 3.41  | 1.43  | 1.20  | 2.16  | 2.83  | 1.77  | 2.87  | 3.51  | 2.90  |
|                                                         | MONO% (%)                   | 2.2                                                   | 4.0   | 1.1   | 1.1   | 1.8   | 2.3   | 2.5   | 2.2   | 2.4   | 3.9   |
|                                                         | MONO (10 <sup>3</sup> /μL)  | 0.16                                                  | 0.25  | 0.11  | 0.09  | 0.15  | 0.13  | 0.16  | 0.18  | 0.21  | 0.25  |
|                                                         | EOS% (%)                    | 2.9                                                   | 2.7   | 1.2   | 1.3   | 1.4   | 2.1   | 1.3   | 1.9   | 1.9   | 2.1   |
|                                                         | EOS (10 <sup>3</sup> /μL)   | 0.21                                                  | 0.17  | 0.12  | 0.11  | 0.11  | 0.12  | 0.08  | 0.15  | 0.17  | 0.13  |
|                                                         | BAS% (%)                    | 0.6                                                   | 0.4   | 0.4   | 0.4   | 0.4   | 0.7   | 0.4   | 0.4   | 0.5   | 0.8   |
|                                                         | BAS (10 <sup>3</sup> /μL)   | 0.04                                                  | 0.02  | 0.04  | 0.03  | 0.03  | 0.04  | 0.03  | 0.03  | 0.04  | 0.05  |
|                                                         | LUC% (%)                    | 0.9                                                   | 1.1   | 0.4   | 0.5   | 0.7   | 1.5   | 1.0   | 0.8   | 0.8   | 1.7   |
|                                                         | LUC (10 <sup>3</sup> /μL)   | 0.07                                                  | 0.07  | 0.04  | 0.05  | 0.06  | 0.09  | 0.06  | 0.06  | 0.07  | 0.11  |
|                                                         | MAC                         | N/A                                                   | N/A   | N/A   | N/A   | N/A   | N/A   | N/A   | N/A   | N/A   | N/A   |
|                                                         | LPLT                        | N/A                                                   | N/A   | N/A   | N/A   | N/A   | N/A   | N/A   | N/A   | N/A   | N/A   |
|                                                         | CPLT                        | N/A                                                   | N/A   | N/A   | N/A   | N/A   | N/A   | N/A   | N/A   | N/A   | N/A   |
|                                                         | ANIS                        | N/A                                                   | N/A   | N/A   | N/A   | N/A   | N/A   | N/A   | N/A   | N/A   | N/A   |
| ATYP                                                    | N/A                         | N/A                                                   | N/A   | N/A   | N/A   | N/A   | N/A   | N/A   | N/A   | N/A   |       |
| COMMENT                                                 | HEM                         | HEM                                                   | HEM   | N/A   | N/A   | N/A   | N/A   | N/A   | N/A   | N/A   |       |
| PT (sec)                                                | 11.7                        | 11.0                                                  | 11.3  | 11.4  | 10.9  | 11.2  | 11.0  | 11.5  | NOSA  | 11.3  |       |
| APTT (sec)                                              | 21.7                        | 21.8                                                  | 22.1  | 21.3  | 23.1  | 22.3  | 22.8  | 23.3  | NOSA  | 24.1  |       |
| FIB (mg/dL)                                             | 157                         | 153                                                   | 172   | 163   | 149   | 138   | 197   | 141   | NOSA  | 218   |       |
| DIME (ng/mL)                                            | 289.5                       | 262.1                                                 | 354.9 | 364.1 | 301.9 | 298.8 | 599.6 | 355.6 | NOSA  | 404.9 |       |
| FDP (FEU)                                               | <2.5                        | <2.5                                                  | <2.5  | <2.5  | <2.5  | <2.5  | <2.5  | <2.5  | NOSA  | <2.5  |       |

| Group (Necropsy Day) |              | Group 6 (Necropsy Day 180±5)                          |      |      |      |      |      |       |       |       |      |
|----------------------|--------------|-------------------------------------------------------|------|------|------|------|------|-------|-------|-------|------|
| Animal ID (Sex)      |              | 18-042 (Female)                                       |      |      |      |      |      |       |       |       |      |
| Treatment (Dose)     |              | GTP-206 (4.5 x 10 <sup>12</sup> GC/Animal – Low Dose) |      |      |      |      |      |       |       |       |      |
| Study Day            | BL           | 0                                                     | 7±1  | 14±2 | 28±3 | 60±3 | 90±4 | 120±4 | 150±4 | 180±5 |      |
| Serum Chemistry      | BUN (mg/dL)  | 30                                                    | 21   | 23   | 24   | 21   | 22   | 14    | 15    | 17    | 18   |
|                      | CREA (mg/dL) | 0.5                                                   | 0.6  | 0.5  | 0.5  | 0.5  | 0.5  | 0.5   | 0.5   | 0.6   | 0.5  |
|                      | GLU (mg/dL)  | 103                                                   | 103  | 86   | 77   | 88   | 99   | 81    | 81    | 85    | 104  |
|                      | NA (mmol/L)  | 148                                                   | 146  | 148  | 148  | 146  | 146  | 143   | 150   | 145   | 145  |
|                      | K (mmol/L)   | 3.2                                                   | 3.5  | 3.1  | 3.1  | 3.4  | 3.2  | 4.2   | 3.6   | 3.5   | 3.3  |
|                      | CL (mmol/L)  | 107                                                   | 108  | 110  | 110  | 108  | 109  | 105   | 110   | 106   | 107  |
|                      | ALP (U/L)    | 603                                                   | 720  | 648  | 592  | 641  | 734  | 646   | 668   | 654   | 592  |
|                      | ALT (U/L)    | 22                                                    | 20   | 20   | 21   | 28   | 21   | 26    | 22    | 25    | 17   |
|                      | AST (U/L)    | 35                                                    | 32   | 28   | 33   | 34   | 31   | 91    | 31    | 29    | 22   |
|                      | TBIL (mg/dL) | 0.2                                                   | 0.1  | 0.2  | 0.2  | 0.2  | 0.1  | 0.2   | 0.2   | 0.1   | 0.1  |
|                      | LDH (U/L)    | 241                                                   | 252  | 212  | 245  | 267  | 228  | 800   | 196   | 263   | 190  |
|                      | CPK (U/L)    | 354                                                   | 730  | 260  | 837  | 421  | 673  | 8207  | 241   | 407   | 260  |
|                      | GGT (U/L)    | 91                                                    | 89   | 97   | 105  | 99   | 110  | 102   | 107   | 102   | 96   |
|                      | TPRO (g/dL)  | 5.3                                                   | 5.8  | 6.1  | 6.1  | 6.0  | 5.9  | 6.3   | 6.5   | 6.1   | 6.3  |
|                      | ALB (g/dL)   | 3.9                                                   | 3.9  | 4.0  | 3.9  | 3.9  | 3.9  | 4.1   | 4.0   | 4.0   | 4.0  |
|                      | GLOB (g/dL)  | 1.4                                                   | 1.9  | 2.1  | 2.2  | 2.1  | 2.0  | 2.2   | 2.5   | 2.1   | 2.3  |
|                      | A/G          | 2.79                                                  | 2.05 | 1.90 | 1.77 | 1.86 | 1.95 | 1.86  | 1.60  | 1.90  | 1.74 |
|                      | CA (mg/dL)   | 9.7                                                   | 10.1 | 9.5  | 9.5  | 9.9  | 9.3  | 9.5   | 9.9   | 9.9   | 9.8  |
|                      | PHOS (mg/dL) | 5.2                                                   | 4.6  | 4.2  | 4.0  | 4.7  | 4.2  | 5.9   | 6.7   | 5.4   | 4.8  |
|                      | ALD (U/L)    | 19.4                                                  | 22.3 | 17.3 | 22.7 | 18.1 | 19.7 | 109.6 | 16.0  | 17.9  | 11.4 |
| CKMM (U/L)           | QNS          | 604                                                   | 193  | 716  | 320  | 551  | 7838 | 177   | 294   | 184   |      |
| CKM% (%)             | QNS          | 82.7                                                  | 74.4 | 85.5 | 75.9 | 81.9 | 95.5 | 73.4  | 72.2  | 70.7  |      |
| CKMB (U/L)           | QNS          | 65                                                    | 34   | 62   | 46   | 49   | 140  | 26    | 50    | 44    |      |
| CMB% (%)             | QNS          | 8.9                                                   | 12.9 | 7.4  | 10.9 | 7.3  | 1.7  | 10.9  | 12.4  | 16.9  |      |
| CKBB (U/L)           | QNS          | 61                                                    | 33   | 59   | 56   | 72   | 230  | 38    | 63    | 32    |      |
| CKB% (%)             | QNS          | 8.4                                                   | 12.6 | 7.1  | 13.2 | 10.7 | 2.8  | 15.6  | 15.5  | 12.4  |      |
| COMMENT              | N/A          | N/A                                                   | N/A  | N/A  | N/A  | N/A  | HEM  | N/A   | N/A   | N/A   |      |

|                                                         | Group (Necropsy Day)        | Group 6 (Necropsy Day 180±5)                          |       |       |       |       |       |       |       |       |       |
|---------------------------------------------------------|-----------------------------|-------------------------------------------------------|-------|-------|-------|-------|-------|-------|-------|-------|-------|
|                                                         | Animal ID (Sex)             | 18-121 (Female)                                       |       |       |       |       |       |       |       |       |       |
|                                                         | Treatment (Dose)            | GTP-206 (4.5 x 10 <sup>12</sup> GC/Animal – Low Dose) |       |       |       |       |       |       |       |       |       |
|                                                         | Study Day                   | BL                                                    | 0     | 7±1   | 14±2  | 28±3  | 60±3  | 90±4  | 120±4 | 150±4 | 180±5 |
| Complete Blood Counts (Hematology) & Plasma Coagulation | WBC (10 <sup>3</sup> /μL)   | 8.66                                                  | 8.08  | 8.30  | 11.38 | 9.27  | 7.71  | 8.83  | 8.33  | 8.51  | 8.21  |
|                                                         | RBC (10 <sup>6</sup> /μL)   | 6.24                                                  | 5.80  | 5.75  | 5.88  | 5.89  | 5.80  | 5.87  | 5.98  | 5.84  | 5.91  |
|                                                         | HB (g/dL)                   | 14.0                                                  | 12.7  | 12.6  | 13.0  | 12.9  | 12.8  | 12.8  | 13.1  | 12.9  | 12.7  |
|                                                         | HCT (%)                     | 45.0                                                  | 42.0  | 41.3  | 42.5  | 42.5  | 41.9  | 42.3  | 42.8  | 41.6  | 42.1  |
|                                                         | MCV (fL)                    | 72.2                                                  | 72.5  | 71.9  | 72.3  | 72.2  | 72.2  | 72.1  | 71.5  | 71.2  | 71.3  |
|                                                         | MCH (pg)                    | 22.4                                                  | 21.9  | 21.9  | 22.0  | 21.9  | 22.1  | 21.8  | 22.0  | 22.1  | 21.4  |
|                                                         | MCHC (g/dL)                 | 31.0                                                  | 30.2  | 30.4  | 30.5  | 30.4  | 30.6  | 30.2  | 30.7  | 31.0  | 30.1  |
|                                                         | PLT (10 <sup>3</sup> /μL)   | 323                                                   | 263   | 363   | 376   | 354   | 346   | 332   | 318   | 337   | 235   |
|                                                         | NEU% (%)                    | 41.9                                                  | 37.3  | 64.0  | 73.7  | 69.9  | 45.1  | 61.6  | 60.0  | 49.6  | 63.0  |
|                                                         | NEU (10 <sup>3</sup> /μL)   | 3.62                                                  | 3.01  | 5.31  | 8.39  | 6.47  | 3.48  | 5.44  | 5.00  | 4.22  | 5.17  |
|                                                         | LYMPH% (%)                  | 49.7                                                  | 55.3  | 30.6  | 22.9  | 24.7  | 50.0  | 30.0  | 34.1  | 43.9  | 30.3  |
|                                                         | LYMPH (10 <sup>3</sup> /μL) | 4.30                                                  | 4.47  | 2.54  | 2.60  | 2.29  | 3.85  | 2.65  | 2.84  | 3.73  | 2.49  |
|                                                         | MONO% (%)                   | 2.7                                                   | 3.5   | 2.2   | 1.3   | 2.7   | 1.9   | 5.1   | 3.3   | 2.8   | 2.9   |
|                                                         | MONO (10 <sup>3</sup> /μL)  | 0.23                                                  | 0.28  | 0.18  | 0.15  | 0.25  | 0.15  | 0.45  | 0.27  | 0.24  | 0.24  |
|                                                         | EOS% (%)                    | 3.0                                                   | 2.2   | 1.7   | 0.9   | 0.9   | 1.0   | 1.5   | 1.3   | 2.0   | 1.7   |
|                                                         | EOS (10 <sup>3</sup> /μL)   | 0.26                                                  | 0.18  | 0.14  | 0.10  | 0.08  | 0.08  | 0.13  | 0.11  | 0.17  | 0.14  |
|                                                         | BAS% (%)                    | 1.0                                                   | 0.5   | 0.7   | 0.4   | 0.8   | 0.6   | 1.0   | 0.4   | 0.8   | 1.1   |
|                                                         | BAS (10 <sup>3</sup> /μL)   | 0.08                                                  | 0.04  | 0.05  | 0.05  | 0.07  | 0.04  | 0.09  | 0.04  | 0.07  | 0.09  |
|                                                         | LUC% (%)                    | 1.8                                                   | 1.3   | 0.8   | 0.8   | 1.1   | 1.5   | 0.9   | 0.8   | 1.0   | 1.0   |
|                                                         | LUC (10 <sup>3</sup> /μL)   | 0.16                                                  | 0.11  | 0.07  | 0.09  | 0.10  | 0.11  | 0.08  | 0.06  | 0.08  | 0.08  |
|                                                         | MAC                         | N/A                                                   | N/A   | N/A   | N/A   | N/A   | N/A   | N/A   | N/A   | N/A   | N/A   |
|                                                         | LPLT                        | N/A                                                   | N/A   | N/A   | N/A   | N/A   | N/A   | N/A   | N/A   | N/A   | N/A   |
|                                                         | CPLT                        | N/A                                                   | +     | N/A   | N/A   | +     | N/A   | +     | +     | +     | +     |
|                                                         | ANIS                        | N/A                                                   | N/A   | N/A   | N/A   | N/A   | N/A   | N/A   | N/A   | N/A   | N/A   |
|                                                         | ATYP                        | N/A                                                   | N/A   | N/A   | N/A   | N/A   | N/A   | N/A   | N/A   | N/A   | N/A   |
|                                                         | COMMENT                     | N/A                                                   | N/A   | N/A   | N/A   | N/A   | N/A   | HEM   | N/A   | N/A   | N/A   |
| PT (sec)                                                | 10.4                        | 10.3                                                  | 10.3  | 10.0  | 9.8   | 10.1  | 10.7  | 10.7  | 10.3  | 10.5  |       |
| APTT (sec)                                              | 19.9                        | 20.7                                                  | 20.7  | 19.9  | 20.1  | 20.7  | 20.3  | 21.3  | 20.7  | 21.2  |       |
| FIB (mg/dL)                                             | 218                         | 208                                                   | 224   | 238   | 216   | 201   | 119   | 208   | 201   | 199   |       |
| DIME (ng/mL)                                            | 538.4                       | 497.3                                                 | 458.3 | 687.8 | 717.6 | 605.1 | 923.9 | 715.7 | 520.6 | 495.1 |       |
| FDP (FEU)                                               | <2.5                        | 2.5                                                   | <2.5  | 2.5   | 2.5   | <2.5  | 2.5   | 2.5   | <2.5  | <2.5  |       |

| Group (Necropsy Day) |              | Group 6 (Necropsy Day 180±5)                          |      |      |      |      |      |       |       |       |      |
|----------------------|--------------|-------------------------------------------------------|------|------|------|------|------|-------|-------|-------|------|
| Animal ID (Sex)      |              | 18-121 (Female)                                       |      |      |      |      |      |       |       |       |      |
| Treatment (Dose)     |              | GTP-206 (4.5 x 10 <sup>12</sup> GC/Animal – Low Dose) |      |      |      |      |      |       |       |       |      |
| Study Day            | BL           | 0                                                     | 7±1  | 14±2 | 28±3 | 60±3 | 90±4 | 120±4 | 150±4 | 180±5 |      |
| Serum Chemistry      | BUN (mg/dL)  | QNS                                                   | 20   | 20   | 20   | 18   | 19   | 14    | 18    | 16    | 17   |
|                      | CREA (mg/dL) | QNS                                                   | 0.6  | 0.5  | 0.5  | 0.4  | 0.5  | 0.4   | 0.5   | 0.5   | 0.5  |
|                      | GLU (mg/dL)  | QNS                                                   | 99   | 88   | 91   | 86   | 97   | 92    | 76    | 100   | 75   |
|                      | NA (mmol/L)  | 148                                                   | 147  | 148  | 147  | 146  | 147  | 147   | 151   | 147   | 148  |
|                      | K (mmol/L)   | 3.5                                                   | 3.2  | 3.4  | 3.3  | 3.4  | 3.2  | 3.6   | 3.7   | 3.3   | 3.5  |
|                      | CL (mmol/L)  | 107                                                   | 107  | 107  | 108  | 105  | 106  | 107   | 109   | 106   | 108  |
|                      | ALP (U/L)    | 669                                                   | 696  | 702  | 624  | 636  | 740  | 797   | 749   | 680   | 703  |
|                      | ALT (U/L)    | 30                                                    | 24   | 32   | 28   | 27   | 34   | 32    | 29    | 29    | 23   |
|                      | AST (U/L)    | QNS                                                   | 28   | 35   | 28   | 32   | 26   | 37    | 31    | 33    | 31   |
|                      | TBIL (mg/dL) | QNS                                                   | 0.2  | 0.2  | 0.2  | 0.2  | 0.2  | 0.2   | 0.3   | 0.2   | 0.2  |
|                      | LDH (U/L)    | QNS                                                   | 246  | 375  | 226  | 253  | 222  | 294   | 208   | 314   | 275  |
|                      | CPK (U/L)    | QNS                                                   | 360  | 119  | 104  | 173  | 142  | 899   | 273   | 793   | 580  |
|                      | GGT (U/L)    | QNS                                                   | 77   | 87   | 93   | 85   | 91   | 91    | 100   | 93    | 92   |
|                      | TPRO (g/dL)  | QNS                                                   | 6.2  | 6.4  | 6.5  | 6.4  | 6.0  | 6.5   | 6.8   | 6.3   | 6.6  |
|                      | ALB (g/dL)   | 4.2                                                   | 4.0  | 4.2  | 4.2  | 4.0  | 3.8  | 4.2   | 4.3   | 4.2   | 4.3  |
|                      | GLOB (g/dL)  | QNS                                                   | 2.2  | 2.2  | 2.3  | 2.4  | 2.2  | 2.3   | 2.5   | 2.1   | 2.3  |
|                      | A/G          | QNS                                                   | 1.82 | 1.91 | 1.83 | 1.67 | 1.73 | 1.83  | 1.72  | 2.00  | 1.87 |
|                      | CA (mg/dL)   | QNS                                                   | 10.1 | 9.9  | 9.7  | 9.9  | 9.2  | 9.8   | 10.0  | 10.0  | 10.1 |
|                      | PHOS (mg/dL) | QNS                                                   | 5.0  | 5.7  | 5.9  | 6.1  | 5.9  | 6.5   | 7.3   | 6.6   | 6.3  |
|                      | ALD (U/L)    | QNS                                                   | 18.9 | 25.1 | 17.9 | 18.1 | 16.6 | 28.1  | 17.9  | 23.0  | 20.5 |
|                      | CKMM (U/L)   | QNS                                                   | 278  | 62   | 56   | 108  | 76   | 763   | 214   | 703   | 503  |
|                      | CKM% (%)     | QNS                                                   | 77.2 | 51.8 | 53.8 | 62.7 | 53.6 | 84.9  | 78.4  | 88.7  | 86.8 |
|                      | CKMB (U/L)   | QNS                                                   | 45   | 26   | 30   | 44   | 36   | 56    | 26    | 46    | 39   |
| CMB% (%)             | QNS          | 12.6                                                  | 21.5 | 28.7 | 25.5 | 25.4 | 6.2  | 9.4   | 5.8   | 6.7   |      |
| CKBB (U/L)           | QNS          | 37                                                    | 32   | 18   | 20   | 30   | 80   | 33    | 44    | 38    |      |
| CKB% (%)             | QNS          | 10.2                                                  | 26.7 | 17.6 | 11.8 | 21.0 | 8.9  | 12.2  | 5.5   | 6.5   |      |
| COMMENT              | N/A          | N/A                                                   | N/A  | N/A  | N/A  | N/A  | N/A  | N/A   | N/A   | N/A   |      |

|                                                         | Group (Necropsy Day)        | Group 6 (Necropsy Day 180±5)                          |       |       |       |       |       |       |       |       |       |
|---------------------------------------------------------|-----------------------------|-------------------------------------------------------|-------|-------|-------|-------|-------|-------|-------|-------|-------|
|                                                         | Animal ID (Sex)             | 18-171 (Male)                                         |       |       |       |       |       |       |       |       |       |
|                                                         | Treatment (Dose)            | GTP-206 (4.5 x 10 <sup>12</sup> GC/Animal – Low Dose) |       |       |       |       |       |       |       |       |       |
|                                                         | Study Day                   | BL                                                    | 0     | 7±1   | 14±2  | 28±3  | 60±3  | 90±4  | 120±4 | 150±4 | 180±5 |
| Complete Blood Counts (Hematology) & Plasma Coagulation | WBC (10 <sup>3</sup> /μL)   | 13.66                                                 | 10.55 | 8.86  | 9.70  | 20.47 | 22.57 | 12.60 | 11.33 | 15.81 | 12.79 |
|                                                         | RBC (10 <sup>6</sup> /μL)   | 5.69                                                  | 5.58  | 5.57  | 5.64  | 5.68  | 6.17  | 5.69  | 5.77  | 5.57  | 5.65  |
|                                                         | HB (g/dL)                   | 12.7                                                  | 12.4  | 12.3  | 12.3  | 12.4  | 13.2  | 12.1  | 12.5  | 12.1  | 12.2  |
|                                                         | HCT (%)                     | 42.3                                                  | 41.9  | 41.8  | 41.4  | 40.8  | 43.4  | 39.5  | 40.4  | 39.6  | 39.9  |
|                                                         | MCV (fL)                    | 74.3                                                  | 75.2  | 75.1  | 73.5  | 71.8  | 70.3  | 69.4  | 70.1  | 71.1  | 70.6  |
|                                                         | MCH (pg)                    | 22.3                                                  | 22.2  | 22.2  | 21.7  | 21.8  | 21.4  | 21.3  | 21.7  | 21.8  | 21.5  |
|                                                         | MCHC (g/dL)                 | 30.0                                                  | 29.6  | 29.5  | 29.6  | 30.3  | 30.4  | 30.6  | 31.0  | 30.7  | 30.5  |
|                                                         | PLT (10 <sup>3</sup> /μL)   | 402                                                   | 386   | 359   | 414   | 385   | 386   | 298   | 365   | 375   | 400   |
|                                                         | NEU% (%)                    | 74.7                                                  | 50.9  | 65.1  | 53.7  | 83.4  | 82.4  | 62.3  | 44.3  | 76.0  | 75.0  |
|                                                         | NEU (10 <sup>3</sup> /μL)   | 10.21                                                 | 5.37  | 5.77  | 5.22  | 17.07 | 18.60 | 7.85  | 5.02  | 12.01 | 9.60  |
|                                                         | LYMPH% (%)                  | 20.9                                                  | 42.0  | 30.2  | 42.1  | 14.2  | 14.6  | 33.0  | 48.3  | 20.1  | 21.5  |
|                                                         | LYMPH (10 <sup>3</sup> /μL) | 2.86                                                  | 4.43  | 2.68  | 4.08  | 2.90  | 3.29  | 4.16  | 5.48  | 3.17  | 2.75  |
|                                                         | MONO% (%)                   | 2.6                                                   | 2.8   | 2.5   | 2.0   | 1.1   | 1.6   | 2.4   | 2.9   | 1.9   | 1.6   |
|                                                         | MONO (10 <sup>3</sup> /μL)  | 0.36                                                  | 0.30  | 0.22  | 0.20  | 0.22  | 0.37  | 0.30  | 0.33  | 0.30  | 0.20  |
|                                                         | EOS% (%)                    | 0.9                                                   | 1.7   | 0.8   | 0.8   | 0.5   | 0.2   | 1.0   | 2.3   | 1.0   | 0.5   |
|                                                         | EOS (10 <sup>3</sup> /μL)   | 0.13                                                  | 0.18  | 0.07  | 0.07  | 0.10  | 0.05  | 0.12  | 0.26  | 0.15  | 0.06  |
|                                                         | BAS% (%)                    | 0.4                                                   | 1.1   | 0.5   | 0.4   | 0.4   | 0.8   | 0.7   | 0.8   | 0.5   | 0.8   |
|                                                         | BAS (10 <sup>3</sup> /μL)   | 0.05                                                  | 0.12  | 0.04  | 0.04  | 0.09  | 0.18  | 0.09  | 0.09  | 0.07  | 0.10  |
|                                                         | LUC% (%)                    | 0.5                                                   | 1.5   | 0.9   | 0.9   | 0.4   | 0.4   | 0.6   | 1.3   | 0.6   | 0.6   |
|                                                         | LUC (10 <sup>3</sup> /μL)   | 0.06                                                  | 0.16  | 0.08  | 0.09  | 0.08  | 0.09  | 0.07  | 0.15  | 0.10  | 0.08  |
|                                                         | MAC                         | N/A                                                   | N/A   | +     | N/A   | N/A   | N/A   | N/A   | N/A   | N/A   | N/A   |
|                                                         | LPLT                        | N/A                                                   | N/A   | N/A   | N/A   | N/A   | N/A   | N/A   | N/A   | N/A   | N/A   |
|                                                         | CPLT                        | N/A                                                   | N/A   | N/A   | N/A   | N/A   | N/A   | N/A   | N/A   | N/A   | N/A   |
|                                                         | ANIS                        | N/A                                                   | N/A   | N/A   | N/A   | N/A   | N/A   | N/A   | N/A   | N/A   | N/A   |
|                                                         | ATYP                        | N/A                                                   | N/A   | N/A   | N/A   | N/A   | N/A   | N/A   | N/A   | N/A   | N/A   |
|                                                         | COMMENT                     | N/A                                                   | N/A   | N/A   | N/A   | N/A   | HEM   | N/A   | N/A   | N/A   | N/A   |
| PT (sec)                                                | 10.7                        | 10.8                                                  | 10.2  | 10.7  | 10.6  | 11.1  | 10.9  | 11.1  | 11.2  | 10.7  |       |
| APTT (sec)                                              | 19.8                        | 19.9                                                  | 19.6  | 20.9  | 19.1  | 20.5  | 20.3  | 21.1  | 20.6  | 21.2  |       |
| FIB (mg/dL)                                             | 164                         | 174                                                   | 204   | 191   | 187   | 146   | 163   | 174   | 166   | 169   |       |
| DIME (ng/mL)                                            | 528.1                       | 430.3                                                 | 326.3 | 665.4 | 421.7 | 334.7 | 408.8 | 302.8 | 467.6 | 319.9 |       |
| FDP (FEU)                                               | <2.5                        | <2.5                                                  | <2.5  | 2.5   | <2.5  | <2.5  | <2.5  | <2.5  | <2.5  | <2.5  |       |



| Group (Necropsy Day) |              | Group 6 (Necropsy Day 180±5)                          |      |      |      |      |      |       |       |       |      |
|----------------------|--------------|-------------------------------------------------------|------|------|------|------|------|-------|-------|-------|------|
| Animal ID (Sex)      |              | 18-171 (Male)                                         |      |      |      |      |      |       |       |       |      |
| Treatment (Dose)     |              | GTP-206 (4.5 x 10 <sup>12</sup> GC/Animal – Low Dose) |      |      |      |      |      |       |       |       |      |
| Study Day            | BL           | 0                                                     | 7±1  | 14±2 | 28±3 | 60±3 | 90±4 | 120±4 | 150±4 | 180±5 |      |
| Serum Chemistry      | BUN (mg/dL)  | 22                                                    | 23   | 22   | 15   | 23   | 25   | 17    | 17    | 22    | 21   |
|                      | CREA (mg/dL) | 0.6                                                   | 0.6  | 0.6  | 0.7  | 0.6  | 0.6  | 0.4   | 0.5   | 0.5   | 0.6  |
|                      | GLU (mg/dL)  | 128                                                   | 116  | 73   | 91   | 80   | 69   | 107   | 86    | 61    | 73   |
|                      | NA (mmol/L)  | 149                                                   | 150  | 148  | 149  | 147  | 146  | 149   | 149   | 145   | 147  |
|                      | K (mmol/L)   | 3.6                                                   | 3.2  | 3.6  | 3.4  | 3.2  | 3.3  | 3.2   | 3.2   | 3.3   | 3.6  |
|                      | CL (mmol/L)  | 107                                                   | 108  | 106  | 107  | 107  | 107  | 108   | 107   | 106   | 109  |
|                      | ALP (U/L)    | 517                                                   | 571  | 424  | 468  | 399  | 485  | 428   | 425   | 445   | 494  |
|                      | ALT (U/L)    | 39                                                    | 34   | 32   | 28   | 34   | 33   | 29    | 37    | 36    | 43   |
|                      | AST (U/L)    | 23                                                    | 21   | 31   | 24   | 29   | 24   | 23    | 26    | 31    | 72   |
|                      | TBIL (mg/dL) | 0.1                                                   | 0.1  | 0.2  | 0.1  | 0.2  | 0.2  | 0.2   | 0.2   | 0.2   | 0.2  |
|                      | LDH (U/L)    | 350                                                   | 234  | 430  | 306  | 281  | 261  | 221   | 306   | 376   | 603  |
|                      | CPK (U/L)    | 555                                                   | 98   | 790  | 141  | 460  | 218  | 229   | 189   | 454   | 4734 |
|                      | GGT (U/L)    | 85                                                    | 86   | 84   | 80   | 89   | 87   | 73    | 82    | 98    | 98   |
|                      | TPRO (g/dL)  | 6.3                                                   | 6.2  | 6.7  | 6.2  | 6.4  | 6.3  | 6.0   | 6.0   | 6.3   | 5.9  |
|                      | ALB (g/dL)   | 4.0                                                   | 4.0  | 4.2  | 3.9  | 4.1  | 4.2  | 3.8   | 3.9   | 3.9   | 3.9  |
|                      | GLOB (g/dL)  | 2.3                                                   | 2.2  | 2.5  | 2.3  | 2.3  | 2.1  | 2.2   | 2.1   | 2.4   | 2.0  |
|                      | A/G          | 1.74                                                  | 1.82 | 1.68 | 1.70 | 1.78 | 2.00 | 1.73  | 1.86  | 1.63  | 1.95 |
|                      | CA (mg/dL)   | 9.9                                                   | 10.2 | 10.1 | 9.7  | 9.3  | 9.2  | 8.9   | 9.6   | 9.6   | 9.6  |
|                      | PHOS (mg/dL) | 5.9                                                   | 4.0  | 7.3  | 6.8  | 6.0  | 5.9  | 5.6   | 4.7   | 6.0   | 6.3  |
|                      | ALD (U/L)    | 28.1                                                  | 17.4 | 30.3 | 21.9 | 23.2 | 14.7 | 15.8  | 23.2  | 23.5  | 76.2 |
| CKMM (U/L)           | 459          | 39                                                    | 690  | 75   | 371  | 155  | 146  | 123   | 383   | 4502  |      |
| CKM% (%)             | 82.7         | 40.3                                                  | 87.4 | 53.1 | 80.6 | 71.1 | 63.6 | 64.9  | 84.4  | 95.1  |      |
| CKMB (U/L)           | 60           | 30                                                    | 66   | 26   | 44   | 28   | 37   | 33    | 45    | 99    |      |
| CMB% (%)             | 10.8         | 30.5                                                  | 8.3  | 18.3 | 9.6  | 12.9 | 16.1 | 17.7  | 10.0  | 2.1   |      |
| CKBB (U/L)           | 36           | 29                                                    | 34   | 40   | 46   | 35   | 46   | 33    | 25    | 133   |      |
| CKB% (%)             | 6.5          | 29.2                                                  | 4.3  | 28.6 | 9.9  | 16.1 | 20.3 | 17.5  | 5.6   | 2.8   |      |
| COMMENT              | N/A          | N/A                                                   | N/A  | N/A  | N/A  | N/A  | N/A  | N/A   | N/A   | N/A   |      |

|                                                         | Group (Necropsy Day)        | Group 3 (Necropsy Day 90±4)                           |       |       |       |       |       |       |       |       |     |
|---------------------------------------------------------|-----------------------------|-------------------------------------------------------|-------|-------|-------|-------|-------|-------|-------|-------|-----|
|                                                         | Animal ID (Sex)             | 18-167 (Male)                                         |       |       |       |       |       |       |       |       |     |
|                                                         | Treatment (Dose)            | GTP-206 (1.5 x 10 <sup>13</sup> GC/Animal – Mid-Dose) |       |       |       |       |       |       |       |       |     |
| Study Day                                               | BL                          | 0                                                     | 7±1   | 14±2  | 28±3  | 60±3  | 90±4  | 120±4 | 150±4 | 180±5 |     |
| Complete Blood Counts (Hematology) & Plasma Coagulation | WBC (10 <sup>3</sup> /μL)   | 9.58                                                  | 7.16  | 7.78  | 8.04  | 9.56  | 9.83  | 7.28  | N/A   | N/A   | N/A |
|                                                         | RBC (10 <sup>6</sup> /μL)   | 5.87                                                  | 5.67  | 5.89  | 6.05  | 6.09  | 6.20  | 5.85  | N/A   | N/A   | N/A |
|                                                         | HB (g/dL)                   | 13.0                                                  | 12.8  | 13.0  | 13.1  | 13.2  | 13.3  | 12.7  | N/A   | N/A   | N/A |
|                                                         | HCT (%)                     | 44.0                                                  | 42.3  | 44.0  | 44.9  | 44.7  | 45.4  | 42.6  | N/A   | N/A   | N/A |
|                                                         | MCV (fL)                    | 74.9                                                  | 74.7  | 74.8  | 74.2  | 73.4  | 73.3  | 72.9  | N/A   | N/A   | N/A |
|                                                         | MCH (pg)                    | 22.2                                                  | 22.5  | 22.2  | 21.6  | 21.7  | 21.5  | 21.8  | N/A   | N/A   | N/A |
|                                                         | MCHC (g/dL)                 | 29.6                                                  | 30.1  | 29.6  | 29.1  | 29.5  | 29.3  | 29.9  | N/A   | N/A   | N/A |
|                                                         | PLT (10 <sup>3</sup> /μL)   | 486                                                   | 566   | 568   | 516   | 560   | 532   | 525   | N/A   | N/A   | N/A |
|                                                         | NEU% (%)                    | 67.4                                                  | 36.1  | 68.7  | 39.8  | 57.1  | 54.4  | 41.5  | N/A   | N/A   | N/A |
|                                                         | NEU (10 <sup>3</sup> /μL)   | 6.45                                                  | 2.58  | 5.34  | 3.20  | 5.46  | 5.34  | 3.02  | N/A   | N/A   | N/A |
|                                                         | LYMPH% (%)                  | 27.5                                                  | 52.6  | 28.0  | 51.0  | 36.4  | 37.6  | 48.8  | N/A   | N/A   | N/A |
|                                                         | LYMPH (10 <sup>3</sup> /μL) | 2.64                                                  | 3.77  | 2.18  | 4.10  | 3.48  | 3.70  | 3.55  | N/A   | N/A   | N/A |
|                                                         | MONO% (%)                   | 2.6                                                   | 3.9   | 1.6   | 4.4   | 2.4   | 3.8   | 4.4   | N/A   | N/A   | N/A |
|                                                         | MONO (10 <sup>3</sup> /μL)  | 0.25                                                  | 0.28  | 0.12  | 0.35  | 0.23  | 0.38  | 0.32  | N/A   | N/A   | N/A |
|                                                         | EOS% (%)                    | 1.5                                                   | 5.7   | 0.5   | 2.9   | 2.6   | 2.9   | 4.1   | N/A   | N/A   | N/A |
|                                                         | EOS (10 <sup>3</sup> /μL)   | 0.15                                                  | 0.41  | 0.04  | 0.23  | 0.25  | 0.29  | 0.30  | N/A   | N/A   | N/A |
|                                                         | BAS% (%)                    | 0.4                                                   | 0.7   | 0.8   | 0.9   | 0.6   | 0.4   | 0.4   | N/A   | N/A   | N/A |
|                                                         | BAS (10 <sup>3</sup> /μL)   | 0.04                                                  | 0.05  | 0.06  | 0.08  | 0.06  | 0.04  | 0.03  | N/A   | N/A   | N/A |
|                                                         | LUC% (%)                    | 0.5                                                   | 0.9   | 0.4   | 0.9   | 0.9   | 0.8   | 0.9   | N/A   | N/A   | N/A |
|                                                         | LUC (10 <sup>3</sup> /μL)   | 0.05                                                  | 0.07  | 0.03  | 0.07  | 0.09  | 0.08  | 0.06  | N/A   | N/A   | N/A |
|                                                         | MAC                         | N/A                                                   | N/A   | N/A   | N/A   | N/A   | N/A   | N/A   | N/A   | N/A   | N/A |
|                                                         | LPLT                        | N/A                                                   | N/A   | N/A   | N/A   | N/A   | N/A   | N/A   | N/A   | N/A   | N/A |
|                                                         | CPLT                        | N/A                                                   | N/A   | N/A   | +     | N/A   | N/A   | N/A   | N/A   | N/A   | N/A |
|                                                         | ANIS                        | N/A                                                   | N/A   | N/A   | N/A   | N/A   | N/A   | N/A   | N/A   | N/A   | N/A |
| ATYP                                                    | N/A                         | N/A                                                   | N/A   | N/A   | N/A   | N/A   | N/A   | N/A   | N/A   | N/A   |     |
| COMMENT                                                 | N/A                         | N/A                                                   | N/A   | N/A   | N/A   | N/A   | N/A   | N/A   | N/A   | N/A   |     |
| PT (sec)                                                | 10.6                        | 10.7                                                  | 10.7  | 10.6  | 10.2  | 10.8  | 11.3  | N/A   | N/A   | N/A   |     |
| APTT (sec)                                              | 19.5                        | 20.0                                                  | 19.8  | 20.5  | 19.3  | 20.7  | 21.5  | N/A   | N/A   | N/A   |     |
| FIB (mg/dL)                                             | 158                         | 167                                                   | 193   | 154   | 189   | 161   | 157   | N/A   | N/A   | N/A   |     |
| DIME (ng/mL)                                            | 341.3                       | 270.9                                                 | 202.6 | 156.4 | 219.3 | 261.0 | 216.2 | N/A   | N/A   | N/A   |     |
| FDP (FEU)                                               | <2.5                        | <2.5                                                  | <2.5  | <2.5  | <2.5  | <2.5  | <2.5  | N/A   | N/A   | N/A   |     |

| Group (Necropsy Day) |              | Group 3 (Necropsy Day 90±4)                           |      |      |      |      |      |       |       |       |     |
|----------------------|--------------|-------------------------------------------------------|------|------|------|------|------|-------|-------|-------|-----|
| Animal ID (Sex)      |              | 18-167 (Male)                                         |      |      |      |      |      |       |       |       |     |
| Treatment (Dose)     |              | GTP-206 (1.5 x 10 <sup>13</sup> GC/Animal – Mid-Dose) |      |      |      |      |      |       |       |       |     |
| Study Day            | BL           | 0                                                     | 7±1  | 14±2 | 28±3 | 60±3 | 90±4 | 120±4 | 150±4 | 180±5 |     |
| Serum Chemistry      | BUN (mg/dL)  | 19                                                    | 19   | 21   | 23   | 19   | 24   | 23    | N/A   | N/A   | N/A |
|                      | CREA (mg/dL) | 0.5                                                   | 0.5  | 0.5  | 0.5  | 0.4  | 0.4  | 0.4   | N/A   | N/A   | N/A |
|                      | GLU (mg/dL)  | 82                                                    | 84   | 83   | 140  | 61   | 75   | 133   | N/A   | N/A   | N/A |
|                      | NA (mmol/L)  | 148                                                   | 145  | 148  | 147  | 146  | 146  | 147   | N/A   | N/A   | N/A |
|                      | K (mmol/L)   | 3.3                                                   | 3.7  | 3.8  | 3.2  | 3.5  | 3.5  | 3.9   | N/A   | N/A   | N/A |
|                      | CL (mmol/L)  | 108                                                   | 107  | 109  | 107  | 107  | 107  | 107   | N/A   | N/A   | N/A |
|                      | ALP (U/L)    | 1184                                                  | 953  | 1116 | 975  | 1130 | 1228 | 1156  | N/A   | N/A   | N/A |
|                      | ALT (U/L)    | 26                                                    | 21   | 18   | 21   | 23   | 18   | 18    | N/A   | N/A   | N/A |
|                      | AST (U/L)    | 39                                                    | 30   | 28   | 27   | 31   | 31   | 35    | N/A   | N/A   | N/A |
|                      | TBIL (mg/dL) | 0.2                                                   | 0.2  | 0.2  | 0.2  | 0.2  | 0.1  | 0.1   | N/A   | N/A   | N/A |
|                      | LDH (U/L)    | 394                                                   | 357  | 350  | 265  | 337  | 338  | 619   | N/A   | N/A   | N/A |
|                      | CPK (U/L)    | 789                                                   | 243  | 113  | 220  | 167  | 215  | 208   | N/A   | N/A   | N/A |
|                      | GGT (U/L)    | 104                                                   | 95   | 94   | 87   | 98   | 96   | 99    | N/A   | N/A   | N/A |
|                      | TPRO (g/dL)  | 5.9                                                   | 5.5  | 6.0  | 5.7  | 6.0  | 5.8  | 5.1   | N/A   | N/A   | N/A |
|                      | ALB (g/dL)   | 3.9                                                   | 4.0  | 4.0  | 3.9  | 3.9  | 3.8  | 3.4   | N/A   | N/A   | N/A |
|                      | GLOB (g/dL)  | 2.0                                                   | 1.5  | 2.0  | 1.8  | 2.1  | 2.0  | 1.7   | N/A   | N/A   | N/A |
|                      | A/G          | 1.95                                                  | 2.67 | 2.00 | 2.17 | 1.86 | 1.90 | 2.00  | N/A   | N/A   | N/A |
|                      | CA (mg/dL)   | 9.8                                                   | 10.1 | 10.1 | 9.8  | 9.9  | 9.5  | 9.5   | N/A   | N/A   | N/A |
|                      | PHOS (mg/dL) | 6.2                                                   | 7.4  | 7.5  | 6.9  | 6.0  | 6.1  | 7.3   | N/A   | N/A   | N/A |
|                      | ALD (U/L)    | 42.6                                                  | 35.1 | 23.8 | 23.7 | 31.6 | 25.0 | 34.5  | N/A   | N/A   | N/A |
|                      | CKMM (U/L)   | 679                                                   | 158  | 56   | 135  | 100  | 134  | 128   | N/A   | N/A   | N/A |
|                      | CKM% (%)     | 86.0                                                  | 64.9 | 49.4 | 61.2 | 59.8 | 62.3 | 61.3  | N/A   | N/A   | N/A |
| CKMB (U/L)           | 60           | 41                                                    | 29   | 41   | 30   | 43   | 36   | N/A   | N/A   | N/A   |     |
| CMB% (%)             | 7.6          | 17.0                                                  | 25.4 | 18.7 | 18.0 | 20.1 | 17.5 | N/A   | N/A   | N/A   |     |
| CKBB (U/L)           | 50           | 44                                                    | 28   | 44   | 37   | 38   | 44   | N/A   | N/A   | N/A   |     |
| CKB% (%)             | 6.4          | 18.1                                                  | 25.2 | 20.1 | 22.2 | 17.6 | 21.3 | N/A   | N/A   | N/A   |     |
| COMMENT              | N/A          | N/A                                                   | N/A  | N/A  | N/A  | N/A  | N/A  | N/A   | N/A   | N/A   |     |

|                                                         | Group (Necropsy Day)        | Group 3 (Necropsy Day 90±4)                           |       |       |       |       |       |       |       |       |     |
|---------------------------------------------------------|-----------------------------|-------------------------------------------------------|-------|-------|-------|-------|-------|-------|-------|-------|-----|
|                                                         | Animal ID (Sex)             | 18-176 (Male)                                         |       |       |       |       |       |       |       |       |     |
|                                                         | Treatment (Dose)            | GTP-206 (1.5 x 10 <sup>13</sup> GC/Animal – Mid-Dose) |       |       |       |       |       |       |       |       |     |
| Study Day                                               | BL                          | 0                                                     | 7±1   | 14±2  | 28±3  | 60±3  | 90±4  | 120±4 | 150±4 | 180±5 |     |
| Complete Blood Counts (Hematology) & Plasma Coagulation | WBC (10 <sup>3</sup> /μL)   | 11.16                                                 | 12.13 | 12.05 | 10.67 | 18.41 | 10.86 | 8.80  | N/A   | N/A   | N/A |
|                                                         | RBC (10 <sup>6</sup> /μL)   | 5.47                                                  | 5.64  | 5.53  | 5.37  | 5.42  | 5.46  | 5.41  | N/A   | N/A   | N/A |
|                                                         | HB (g/dL)                   | 13.4                                                  | 13.6  | 13.3  | 13.1  | 12.9  | 13.6  | 13.0  | N/A   | N/A   | N/A |
|                                                         | HCT (%)                     | 45.6                                                  | 46.3  | 45.9  | 43.7  | 45.4  | 44.1  | 43.3  | N/A   | N/A   | N/A |
|                                                         | MCV (fL)                    | 83.3                                                  | 82.0  | 83.1  | 81.4  | 83.7  | 80.8  | 80.1  | N/A   | N/A   | N/A |
|                                                         | MCH (pg)                    | 24.5                                                  | 24.1  | 24.1  | 24.3  | 23.9  | 24.9  | 24.0  | N/A   | N/A   | N/A |
|                                                         | MCHC (g/dL)                 | 29.5                                                  | 29.4  | 29.0  | 29.9  | 28.5  | 30.9  | 29.9  | N/A   | N/A   | N/A |
|                                                         | PLT (10 <sup>3</sup> /μL)   | 312                                                   | 444   | 439   | 484   | 479   | 288   | 383   | N/A   | N/A   | N/A |
|                                                         | NEU% (%)                    | 66.9                                                  | 63.8  | 53.9  | 46.5  | 73.6  | 39.9  | 62.0  | N/A   | N/A   | N/A |
|                                                         | NEU (10 <sup>3</sup> /μL)   | 7.47                                                  | 7.74  | 6.50  | 4.96  | 13.54 | 4.33  | 5.46  | N/A   | N/A   | N/A |
|                                                         | LYMPH% (%)                  | 29.5                                                  | 32.4  | 40.3  | 47.1  | 22.7  | 51.2  | 34.6  | N/A   | N/A   | N/A |
|                                                         | LYMPH (10 <sup>3</sup> /μL) | 3.29                                                  | 3.94  | 4.85  | 5.03  | 4.17  | 5.56  | 3.04  | N/A   | N/A   | N/A |
|                                                         | MONO% (%)                   | 1.6                                                   | 1.4   | 2.7   | 2.9   | 1.5   | 5.9   | 2.0   | N/A   | N/A   | N/A |
|                                                         | MONO (10 <sup>3</sup> /μL)  | 0.18                                                  | 0.17  | 0.33  | 0.30  | 0.28  | 0.64  | 0.18  | N/A   | N/A   | N/A |
|                                                         | EOS% (%)                    | 0.7                                                   | 1.1   | 1.1   | 1.5   | 0.7   | 1.0   | 0.5   | N/A   | N/A   | N/A |
|                                                         | EOS (10 <sup>3</sup> /μL)   | 0.08                                                  | 0.13  | 0.13  | 0.16  | 0.14  | 0.11  | 0.04  | N/A   | N/A   | N/A |
|                                                         | BAS% (%)                    | 0.5                                                   | 0.8   | 0.7   | 0.8   | 0.8   | 0.5   | 0.3   | N/A   | N/A   | N/A |
|                                                         | BAS (10 <sup>3</sup> /μL)   | 0.05                                                  | 0.09  | 0.09  | 0.08  | 0.14  | 0.06  | 0.03  | N/A   | N/A   | N/A |
|                                                         | LUC% (%)                    | 0.8                                                   | 0.6   | 1.2   | 1.4   | 0.7   | 1.4   | 0.5   | N/A   | N/A   | N/A |
|                                                         | LUC (10 <sup>3</sup> /μL)   | 0.09                                                  | 0.07  | 0.15  | 0.15  | 0.13  | 0.16  | 0.05  | N/A   | N/A   | N/A |
|                                                         | MAC                         | +++                                                   | +++   | +++   | +++   | +++   | ++    | ++    | N/A   | N/A   | N/A |
|                                                         | LPLT                        | N/A                                                   | N/A   | N/A   | N/A   | N/A   | N/A   | N/A   | N/A   | N/A   | N/A |
|                                                         | CPLT                        | N/A                                                   | N/A   | N/A   | N/A   | N/A   | +     | N/A   | N/A   | N/A   | N/A |
| ANIS                                                    | N/A                         | N/A                                                   | N/A   | N/A   | N/A   | N/A   | N/A   | N/A   | N/A   | N/A   |     |
| ATYP                                                    | N/A                         | N/A                                                   | N/A   | N/A   | N/A   | N/A   | N/A   | N/A   | N/A   | N/A   |     |
| COMMENT                                                 | N/A                         | N/A                                                   | N/A   | N/A   | N/A   | HEM   | N/A   | N/A   | N/A   | N/A   |     |
| PT (sec)                                                | 10.0                        | 10.1                                                  | 10.0  | 10.1  | 10.0  | 10.6  | 10.7  | N/A   | N/A   | N/A   |     |
| APTT (sec)                                              | 20.8                        | 19.9                                                  | 21.1  | 22.2  | 21.4  | 23.7  | 22.9  | N/A   | N/A   | N/A   |     |
| FIB (mg/dL)                                             | 216                         | 199                                                   | 218   | 232   | 216   | 181   | 181   | N/A   | N/A   | N/A   |     |
| DIME (ng/mL)                                            | 790.8                       | 9000.                                                 | 259.6 | 588.9 | 407.2 | 783.9 | 448.5 | N/A   | N/A   | N/A   |     |
| FDP (FEU)                                               | <2.5                        | 40.0                                                  | <2.5  | 2.5   | <2.5  | 2.5   | <2.5  | N/A   | N/A   | N/A   |     |

| Group (Necropsy Day) |              | Group 3 (Necropsy Day 90±4)                           |      |      |      |      |      |       |       |       |     |
|----------------------|--------------|-------------------------------------------------------|------|------|------|------|------|-------|-------|-------|-----|
| Animal ID (Sex)      |              | 18-176 (Male)                                         |      |      |      |      |      |       |       |       |     |
| Treatment (Dose)     |              | GTP-206 (1.5 x 10 <sup>13</sup> GC/Animal – Mid-Dose) |      |      |      |      |      |       |       |       |     |
| Study Day            | BL           | 0                                                     | 7±1  | 14±2 | 28±3 | 60±3 | 90±4 | 120±4 | 150±4 | 180±5 |     |
| Serum Chemistry      | BUN (mg/dL)  | 19                                                    | 20   | 16   | 17   | 21   | 24   | 21    | N/A   | N/A   | N/A |
|                      | CREA (mg/dL) | 0.5                                                   | 0.6  | 0.5  | 0.4  | 0.4  | 0.4  | 0.3   | N/A   | N/A   | N/A |
|                      | GLU (mg/dL)  | 63                                                    | 71   | 72   | 72   | 55   | 68   | 125   | N/A   | N/A   | N/A |
|                      | NA (mmol/L)  | 150                                                   | 151  | 147  | 146  | 144  | 143  | 147   | N/A   | N/A   | N/A |
|                      | K (mmol/L)   | 3.5                                                   | 3.2  | 3.2  | 3.4  | 3.3  | 3.5  | 3.7   | N/A   | N/A   | N/A |
|                      | CL (mmol/L)  | 108                                                   | 108  | 106  | 105  | 104  | 104  | 108   | N/A   | N/A   | N/A |
|                      | ALP (U/L)    | 593                                                   | 566  | 657  | 566  | 646  | 617  | 667   | N/A   | N/A   | N/A |
|                      | ALT (U/L)    | 45                                                    | 28   | 37   | 42   | 49   | 39   | 39    | N/A   | N/A   | N/A |
|                      | AST (U/L)    | 38                                                    | 24   | 33   | 37   | 40   | 37   | 34    | N/A   | N/A   | N/A |
|                      | TBIL (mg/dL) | 0.1                                                   | 0.1  | 0.1  | 0.1  | 0.1  | 0.1  | 0.1   | N/A   | N/A   | N/A |
|                      | LDH (U/L)    | 451                                                   | 262  | 351  | 348  | 380  | 339  | 320   | N/A   | N/A   | N/A |
|                      | CPK (U/L)    | 238                                                   | 102  | 395  | 646  | 253  | 303  | 409   | N/A   | N/A   | N/A |
|                      | GGT (U/L)    | 84                                                    | 84   | 82   | 79   | 93   | 90   | 93    | N/A   | N/A   | N/A |
|                      | TPRO (g/dL)  | 6.6                                                   | 6.7  | 6.4  | 6.1  | 6.2  | 6.1  | 6.0   | N/A   | N/A   | N/A |
|                      | ALB (g/dL)   | 4.1                                                   | 4.2  | 4.2  | 4.0  | 3.8  | 3.8  | 3.8   | N/A   | N/A   | N/A |
|                      | GLOB (g/dL)  | 2.5                                                   | 2.5  | 2.2  | 2.1  | 2.4  | 2.3  | 2.2   | N/A   | N/A   | N/A |
|                      | A/G          | 1.64                                                  | 1.68 | 1.91 | 1.90 | 1.58 | 1.65 | 1.73  | N/A   | N/A   | N/A |
|                      | CA (mg/dL)   | 9.7                                                   | 9.9  | 9.7  | 8.9  | 9.2  | 9.0  | 9.0   | N/A   | N/A   | N/A |
|                      | PHOS (mg/dL) | 6.1                                                   | 5.7  | 5.4  | 5.7  | 5.6  | 5.7  | 6.5   | N/A   | N/A   | N/A |
|                      | ALD (U/L)    | 30.4                                                  | 12.7 | 27.9 | 32.6 | 27.2 | 24.1 | 19.4  | N/A   | N/A   | N/A |
|                      | CKMM (U/L)   | 180                                                   | 36   | 320  | 563  | 187  | 214  | 290   | N/A   | N/A   | N/A |
|                      | CKM% (%)     | 75.5                                                  | 35.0 | 81.0 | 87.2 | 73.9 | 70.7 | 71.0  | N/A   | N/A   | N/A |
| CKMB (U/L)           | 39           | 26                                                    | 36   | 44   | 41   | 46   | 66   | N/A   | N/A   | N/A   |     |
| CMB% (%)             | 16.4         | 25.0                                                  | 9.2  | 6.8  | 16.3 | 15.2 | 16.1 | N/A   | N/A   | N/A   |     |
| CKBB (U/L)           | 19           | 41                                                    | 39   | 39   | 25   | 42   | 53   | N/A   | N/A   | N/A   |     |
| CKB% (%)             | 8.1          | 40.0                                                  | 9.8  | 6.0  | 9.8  | 14.0 | 12.9 | N/A   | N/A   | N/A   |     |
| COMMENT              | N/A          | N/A                                                   | N/A  | N/A  | N/A  | N/A  | N/A  | N/A   | N/A   | N/A   |     |

|                                                         | Group (Necropsy Day)        | Group 3 (Necropsy Day 90±4)                           |       |       |       |       |       |      |       |       |       |
|---------------------------------------------------------|-----------------------------|-------------------------------------------------------|-------|-------|-------|-------|-------|------|-------|-------|-------|
|                                                         | Animal ID (Sex)             | 18-187 (Female)                                       |       |       |       |       |       |      |       |       |       |
|                                                         | Treatment (Dose)            | GTP-206 (1.5 x 10 <sup>13</sup> GC/Animal – Mid-Dose) |       |       |       |       |       |      |       |       |       |
|                                                         | Study Day                   | BL                                                    | 0     | 7±1   | 14±2  | 28±3  | 60±3  | 90±4 | 120±4 | 150±4 | 180±5 |
| Complete Blood Counts (Hematology) & Plasma Coagulation | WBC (10 <sup>3</sup> /μL)   | 12.83                                                 | 11.21 | 8.83  | 8.84  | 11.61 | 10.02 | 7.39 | N/A   | N/A   | N/A   |
|                                                         | RBC (10 <sup>6</sup> /μL)   | 5.65                                                  | 5.70  | 5.45  | 5.64  | 5.65  | 5.79  | 5.32 | N/A   | N/A   | N/A   |
|                                                         | HB (g/dL)                   | 13.2                                                  | 13.3  | 12.5  | 12.9  | 12.9  | 13.4  | 12.1 | N/A   | N/A   | N/A   |
|                                                         | HCT (%)                     | 42.0                                                  | 43.0  | 40.5  | 41.4  | 42.0  | 42.9  | 39.4 | N/A   | N/A   | N/A   |
|                                                         | MCV (fL)                    | 74.3                                                  | 75.4  | 74.4  | 73.5  | 74.5  | 74.2  | 74.0 | N/A   | N/A   | N/A   |
|                                                         | MCH (pg)                    | 23.3                                                  | 23.3  | 23.0  | 22.9  | 22.9  | 23.1  | 22.7 | N/A   | N/A   | N/A   |
|                                                         | MCHC (g/dL)                 | 31.4                                                  | 31.0  | 30.9  | 31.1  | 30.7  | 31.1  | 30.7 | N/A   | N/A   | N/A   |
|                                                         | PLT (10 <sup>3</sup> /μL)   | 402                                                   | 420   | 389   | 385   | 352   | 336   | 397  | N/A   | N/A   | N/A   |
|                                                         | NEU% (%)                    | 65.0                                                  | 62.9  | 52.1  | 46.4  | 47.9  | 50.1  | 51.4 | N/A   | N/A   | N/A   |
|                                                         | NEU (10 <sup>3</sup> /μL)   | 8.34                                                  | 7.04  | 4.61  | 4.10  | 5.56  | 5.01  | 3.80 | N/A   | N/A   | N/A   |
|                                                         | LYMPH% (%)                  | 25.7                                                  | 29.7  | 38.2  | 44.4  | 40.9  | 40.8  | 40.1 | N/A   | N/A   | N/A   |
|                                                         | LYMPH (10 <sup>3</sup> /μL) | 3.30                                                  | 3.33  | 3.38  | 3.93  | 4.75  | 4.09  | 2.96 | N/A   | N/A   | N/A   |
|                                                         | MONO% (%)                   | 2.1                                                   | 1.5   | 2.4   | 2.0   | 2.0   | 3.4   | 2.1  | N/A   | N/A   | N/A   |
|                                                         | MONO (10 <sup>3</sup> /μL)  | 0.27                                                  | 0.17  | 0.21  | 0.17  | 0.23  | 0.34  | 0.16 | N/A   | N/A   | N/A   |
|                                                         | EOS% (%)                    | 6.1                                                   | 4.2   | 5.0   | 4.9   | 6.9   | 4.1   | 5.2  | N/A   | N/A   | N/A   |
|                                                         | EOS (10 <sup>3</sup> /μL)   | 0.79                                                  | 0.47  | 0.45  | 0.43  | 0.80  | 0.41  | 0.39 | N/A   | N/A   | N/A   |
|                                                         | BAS% (%)                    | 0.4                                                   | 0.7   | 0.6   | 0.8   | 0.8   | 0.5   | 0.2  | N/A   | N/A   | N/A   |
|                                                         | BAS (10 <sup>3</sup> /μL)   | 0.05                                                  | 0.08  | 0.05  | 0.07  | 0.09  | 0.05  | 0.02 | N/A   | N/A   | N/A   |
|                                                         | LUC% (%)                    | 0.7                                                   | 1.0   | 1.6   | 1.5   | 1.5   | 1.2   | 0.9  | N/A   | N/A   | N/A   |
|                                                         | LUC (10 <sup>3</sup> /μL)   | 0.09                                                  | 0.11  | 0.14  | 0.14  | 0.18  | 0.12  | 0.07 | N/A   | N/A   | N/A   |
|                                                         | MAC                         | N/A                                                   | N/A   | N/A   | N/A   | +     | N/A   | N/A  | N/A   | N/A   | N/A   |
|                                                         | LPLT                        | N/A                                                   | N/A   | N/A   | N/A   | N/A   | N/A   | N/A  | N/A   | N/A   | N/A   |
|                                                         | CPLT                        | N/A                                                   | N/A   | N/A   | N/A   | N/A   | N/A   | N/A  | N/A   | N/A   | N/A   |
| ANIS                                                    | N/A                         | N/A                                                   | N/A   | N/A   | N/A   | N/A   | N/A   | N/A  | N/A   | N/A   |       |
| ATYP                                                    | N/A                         | N/A                                                   | N/A   | N/A   | N/A   | N/A   | N/A   | N/A  | N/A   | N/A   |       |
| COMMENT                                                 | N/A                         | N/A                                                   | N/A   | N/A   | HEM   | N/A   | N/A   | N/A  | N/A   | N/A   |       |
| PT (sec)                                                | 11.2                        | 11.4                                                  | 11.1  | 11.3  | 11.4  | 12.1  | 11.8  | N/A  | N/A   | N/A   |       |
| APTT (sec)                                              | 20.5                        | 21.1                                                  | 21.0  | 21.6  | 22.0  | 23.5  | 24.0  | N/A  | N/A   | N/A   |       |
| FIB (mg/dL)                                             | 179                         | 181                                                   | 163   | 183   | 164   | 155   | 154   | N/A  | N/A   | N/A   |       |
| DIME (ng/mL)                                            | 610.2                       | 304.4                                                 | 581.8 | 617.0 | 621.4 | 355.6 | 373.7 | N/A  | N/A   | N/A   |       |
| FDP (FEU)                                               | <2.5                        | <2.5                                                  | 2.5   | 2.5   | 2.5   | <2.5  | <2.5  | N/A  | N/A   | N/A   |       |

| Group (Necropsy Day) |              | Group 3 (Necropsy Day 90±4)                           |      |      |      |      |      |       |       |       |     |
|----------------------|--------------|-------------------------------------------------------|------|------|------|------|------|-------|-------|-------|-----|
| Animal ID (Sex)      |              | 18-187 (Female)                                       |      |      |      |      |      |       |       |       |     |
| Treatment (Dose)     |              | GTP-206 (1.5 x 10 <sup>13</sup> GC/Animal – Mid-Dose) |      |      |      |      |      |       |       |       |     |
| Study Day            | BL           | 0                                                     | 7±1  | 14±2 | 28±3 | 60±3 | 90±4 | 120±4 | 150±4 | 180±5 |     |
| Serum Chemistry      | BUN (mg/dL)  | 21                                                    | 21   | 15   | 14   | 19   | 18   | 22    | N/A   | N/A   | N/A |
|                      | CREA (mg/dL) | 0.4                                                   | 0.5  | 0.5  | 0.4  | 0.4  | 0.4  | 0.3   | N/A   | N/A   | N/A |
|                      | GLU (mg/dL)  | 129                                                   | 104  | 129  | 131  | 96   | 87   | 136   | N/A   | N/A   | N/A |
|                      | NA (mmol/L)  | 147                                                   | 148  | 145  | 145  | 144  | 145  | 146   | N/A   | N/A   | N/A |
|                      | K (mmol/L)   | 3.2                                                   | 3.3  | 3.2  | 3.3  | 3.3  | 3.6  | 3.2   | N/A   | N/A   | N/A |
|                      | CL (mmol/L)  | 107                                                   | 107  | 106  | 106  | 105  | 107  | 108   | N/A   | N/A   | N/A |
|                      | ALP (U/L)    | 968                                                   | 924  | 973  | 924  | 1052 | 1056 | 1005  | N/A   | N/A   | N/A |
|                      | ALT (U/L)    | 18                                                    | 15   | 22   | 31   | 28   | 24   | 20    | N/A   | N/A   | N/A |
|                      | AST (U/L)    | 34                                                    | 24   | 29   | 39   | 36   | 34   | 26    | N/A   | N/A   | N/A |
|                      | TBIL (mg/dL) | 0.2                                                   | 0.2  | 0.2  | 0.1  | 0.2  | 0.2  | 0.1   | N/A   | N/A   | N/A |
|                      | LDH (U/L)    | 341                                                   | 244  | 285  | 350  | 400  | 327  | 234   | N/A   | N/A   | N/A |
|                      | CPK (U/L)    | 824                                                   | 271  | 211  | 281  | 214  | 815  | 233   | N/A   | N/A   | N/A |
|                      | GGT (U/L)    | 75                                                    | 76   | 73   | 72   | 78   | 84   | 78    | N/A   | N/A   | N/A |
|                      | TPRO (g/dL)  | 6.1                                                   | 6.1  | 5.8  | 5.9  | 5.8  | 5.8  | 5.6   | N/A   | N/A   | N/A |
|                      | ALB (g/dL)   | 3.9                                                   | 4.0  | 3.8  | 3.8  | 3.6  | 3.7  | 3.5   | N/A   | N/A   | N/A |
|                      | GLOB (g/dL)  | 2.2                                                   | 2.1  | 2.0  | 2.1  | 2.2  | 2.1  | 2.1   | N/A   | N/A   | N/A |
|                      | A/G          | 1.77                                                  | 1.90 | 1.90 | 1.81 | 1.64 | 1.76 | 1.67  | N/A   | N/A   | N/A |
|                      | CA (mg/dL)   | 9.6                                                   | 10.0 | 9.6  | 9.4  | 9.3  | 9.3  | 9.2   | N/A   | N/A   | N/A |
|                      | PHOS (mg/dL) | 5.3                                                   | 7.1  | 6.4  | 5.6  | 6.4  | 7.1  | 7.0   | N/A   | N/A   | N/A |
|                      | ALD (U/L)    | 25.5                                                  | 14.5 | 22.4 | 22.3 | 24.2 | 24.3 | 15.9  | N/A   | N/A   | N/A |
|                      | CKMM (U/L)   | 712                                                   | 139  | 133  | 126  | 97   | 660  | 146   | N/A   | N/A   | N/A |
|                      | CKM% (%)     | 86.4                                                  | 51.4 | 63.2 | 45.0 | 45.5 | 81.0 | 62.8  | N/A   | N/A   | N/A |
| CKMB (U/L)           | 58           | 44                                                    | 29   | 66   | 44   | 56   | 41   | N/A   | N/A   | N/A   |     |
| CMB% (%)             | 7.0          | 16.3                                                  | 13.7 | 23.5 | 20.6 | 6.9  | 17.4 | N/A   | N/A   | N/A   |     |
| CKBB (U/L)           | 54           | 88                                                    | 49   | 89   | 73   | 99   | 46   | N/A   | N/A   | N/A   |     |
| CKB% (%)             | 6.6          | 32.4                                                  | 23.1 | 31.6 | 33.9 | 12.1 | 19.9 | N/A   | N/A   | N/A   |     |
| COMMENT              | N/A          | N/A                                                   | N/A  | N/A  | N/A  | N/A  | N/A  | N/A   | N/A   | N/A   |     |

|                                                         | Group (Necropsy Day)        | Group 7 (Necropsy Day 180±5)                          |       |       |       |       |       |       |       |       |       |
|---------------------------------------------------------|-----------------------------|-------------------------------------------------------|-------|-------|-------|-------|-------|-------|-------|-------|-------|
|                                                         | Animal ID (Sex)             | 18-055 (Male)                                         |       |       |       |       |       |       |       |       |       |
|                                                         | Treatment (Dose)            | GTP-206 (1.5 x 10 <sup>13</sup> GC/Animal – Mid-Dose) |       |       |       |       |       |       |       |       |       |
|                                                         | Study Day                   | BL                                                    | 0     | 7±1   | 14±2  | 28±3  | 60±3  | 90±4  | 120±4 | 150±4 | 180±5 |
| Complete Blood Counts (Hematology) & Plasma Coagulation | WBC (10 <sup>3</sup> /μL)   | 7.91                                                  | 7.07  | 7.11  | 6.97  | 9.27  | 8.54  | 7.00  | 9.17  | 7.25  | 5.78  |
|                                                         | RBC (10 <sup>6</sup> /μL)   | 5.03                                                  | 4.95  | 5.24  | 5.42  | 5.41  | 5.57  | 5.62  | 5.41  | 5.08  | 5.11  |
|                                                         | HB (g/dL)                   | 11.4                                                  | 11.5  | 11.6  | 12.1  | 12.2  | 12.5  | 12.5  | 12.6  | 11.7  | 11.8  |
|                                                         | HCT (%)                     | 37.7                                                  | 37.1  | 39.8  | 40.7  | 40.5  | 41.3  | 41.4  | 39.9  | 38.8  | 38.5  |
|                                                         | MCV (fL)                    | 74.9                                                  | 75.1  | 76.1  | 75.1  | 74.8  | 74.1  | 73.6  | 73.7  | 76.4  | 75.3  |
|                                                         | MCH (pg)                    | 22.7                                                  | 23.2  | 22.2  | 22.3  | 22.5  | 22.4  | 22.2  | 23.3  | 23.1  | 23.1  |
|                                                         | MCHC (g/dL)                 | 30.3                                                  | 30.9  | 29.2  | 29.7  | 30.1  | 30.2  | 30.1  | 31.6  | 30.3  | 30.7  |
|                                                         | PLT (10 <sup>3</sup> /μL)   | 527                                                   | 572   | 509   | 544   | 430   | 465   | 468   | 442   | 464   | 433   |
|                                                         | NEU% (%)                    | 45.8                                                  | 46.5  | 32.9  | 28.4  | 30.4  | 20.3  | 15.1  | 21.5  | 26.0  | 24.0  |
|                                                         | NEU (10 <sup>3</sup> /μL)   | 3.63                                                  | 3.29  | 2.34  | 1.98  | 2.82  | 1.73  | 1.05  | 1.97  | 1.89  | 1.39  |
|                                                         | LYMPH% (%)                  | 47.4                                                  | 48.7  | 60.5  | 66.3  | 63.7  | 73.6  | 79.8  | 70.8  | 67.2  | 69.5  |
|                                                         | LYMPH (10 <sup>3</sup> /μL) | 3.75                                                  | 3.44  | 4.30  | 4.62  | 5.90  | 6.28  | 5.58  | 6.49  | 4.88  | 4.02  |
|                                                         | MONO% (%)                   | 2.4                                                   | 1.4   | 2.7   | 1.7   | 1.9   | 2.7   | 1.6   | 2.4   | 2.7   | 2.0   |
|                                                         | MONO (10 <sup>3</sup> /μL)  | 0.19                                                  | 0.10  | 0.19  | 0.12  | 0.18  | 0.23  | 0.11  | 0.22  | 0.19  | 0.11  |
|                                                         | EOS% (%)                    | 2.1                                                   | 1.5   | 1.5   | 1.7   | 1.8   | 1.4   | 0.9   | 3.1   | 1.0   | 1.8   |
|                                                         | EOS (10 <sup>3</sup> /μL)   | 0.17                                                  | 0.11  | 0.11  | 0.12  | 0.17  | 0.12  | 0.07  | 0.28  | 0.07  | 0.10  |
|                                                         | BAS% (%)                    | 0.5                                                   | 0.4   | 0.5   | 0.5   | 0.6   | 0.3   | 0.9   | 0.8   | 0.8   | 0.7   |
|                                                         | BAS (10 <sup>3</sup> /μL)   | 0.04                                                  | 0.03  | 0.03  | 0.04  | 0.05  | 0.03  | 0.06  | 0.08  | 0.05  | 0.04  |
|                                                         | LUC% (%)                    | 1.8                                                   | 1.5   | 1.9   | 1.4   | 1.6   | 1.8   | 1.8   | 1.4   | 2.3   | 2.0   |
|                                                         | LUC (10 <sup>3</sup> /μL)   | 0.14                                                  | 0.11  | 0.14  | 0.10  | 0.15  | 0.15  | 0.12  | 0.13  | 0.17  | 0.11  |
|                                                         | MAC                         | N/A                                                   | +     | +     | +     | +     | N/A   | N/A   | N/A   | +     | +     |
|                                                         | LPLT                        | N/A                                                   | N/A   | N/A   | N/A   | N/A   | N/A   | N/A   | N/A   | N/A   | N/A   |
|                                                         | CPLT                        | N/A                                                   | N/A   | N/A   | N/A   | N/A   | N/A   | N/A   | N/A   | +     | N/A   |
| ANIS                                                    | N/A                         | N/A                                                   | N/A   | N/A   | N/A   | N/A   | N/A   | N/A   | N/A   | N/A   |       |
| ATYP                                                    | N/A                         | N/A                                                   | N/A   | N/A   | N/A   | N/A   | N/A   | N/A   | N/A   | N/A   |       |
| COMMENT                                                 | N/A                         | N/A                                                   | N/A   | N/A   | N/A   | N/A   | N/A   | N/A   | N/A   | N/A   |       |
| PT (sec)                                                | 10.9                        | 10.7                                                  | 10.6  | 10.8  | 10.8  | 11.1  | 11.1  | 11.1  | 10.8  | 10.8  |       |
| APTT (sec)                                              | 21.7                        | 21.1                                                  | 21.9  | 22.3  | 22.2  | 23.4  | 25.2  | 24.3  | 23.8  | 23.9  |       |
| FIB (mg/dL)                                             | 172                         | 187                                                   | 187   | 197   | 171   | 161   | 151   | 163   | 195   | 204   |       |
| DIME (ng/mL)                                            | 352.8                       | 291.8                                                 | 289.8 | 396.4 | 357.3 | 340.1 | 371.1 | 273.3 | 315.2 | 173.5 |       |
| FDP (FEU)                                               | <2.5                        | <2.5                                                  | <2.5  | <2.5  | <2.5  | <2.5  | <2.5  | <2.5  | <2.5  | <2.5  |       |



| Group (Necropsy Day) |              | Group 7 (Necropsy Day 180±5)                          |      |      |      |      |      |       |       |       |      |
|----------------------|--------------|-------------------------------------------------------|------|------|------|------|------|-------|-------|-------|------|
| Animal ID (Sex)      |              | 18-055 (Male)                                         |      |      |      |      |      |       |       |       |      |
| Treatment (Dose)     |              | GTP-206 (1.5 x 10 <sup>13</sup> GC/Animal – Mid-Dose) |      |      |      |      |      |       |       |       |      |
| Study Day            | BL           | 0                                                     | 7±1  | 14±2 | 28±3 | 60±3 | 90±4 | 120±4 | 150±4 | 180±5 |      |
| Serum Chemistry      | BUN (mg/dL)  | 18                                                    | 22   | 17   | 12   | 26   | 24   | 18    | 19    | 24    | 23   |
|                      | CREA (mg/dL) | 0.5                                                   | 0.5  | 0.5  | 0.4  | 0.4  | 0.4  | 0.4   | 0.4   | 0.5   | 0.5  |
|                      | GLU (mg/dL)  | 68                                                    | 82   | 93   | 114  | 71   | 72   | 93    | 99    | 77    | 102  |
|                      | NA (mmol/L)  | 148                                                   | 149  | 147  | 146  | 145  | 145  | 147   | 146   | 145   | 148  |
|                      | K (mmol/L)   | 3.3                                                   | 3.1  | 3.1  | 3.3  | 3.6  | 3.3  | 3.4   | 3.4   | 3.6   | 3.5  |
|                      | CL (mmol/L)  | 107                                                   | 108  | 106  | 107  | 105  | 106  | 107   | 106   | 106   | 107  |
|                      | ALP (U/L)    | 794                                                   | 770  | 863  | 868  | 886  | 838  | 831   | 791   | 768   | 676  |
|                      | ALT (U/L)    | 27                                                    | 23   | 40   | 66   | 48   | 35   | 32    | 32    | 35    | 29   |
|                      | AST (U/L)    | 42                                                    | 23   | 38   | 38   | 48   | 29   | 26    | 27    | 25    | 25   |
|                      | TBIL (mg/dL) | 0.2                                                   | 0.2  | 0.2  | 0.1  | 0.2  | 0.2  | 0.2   | 0.2   | 0.2   | 0.1  |
|                      | LDH (U/L)    | 347                                                   | 170  | 314  | 192  | 435  | 201  | 192   | 178   | 165   | 202  |
|                      | CPK (U/L)    | 1819                                                  | 237  | 1183 | 122  | 1250 | 161  | 209   | 360   | 149   | 370  |
|                      | GGT (U/L)    | 87                                                    | 89   | 91   | 91   | 104  | 100  | 102   | 98    | 94    | 92   |
|                      | TPRO (g/dL)  | 5.9                                                   | 6.0  | 6.0  | 5.8  | 5.9  | 5.9  | 5.8   | 6.1   | 6.0   | 6.1  |
|                      | ALB (g/dL)   | 3.7                                                   | 3.9  | 3.8  | 3.7  | 3.7  | 3.6  | 3.9   | 3.7   | 3.8   | 3.7  |
|                      | GLOB (g/dL)  | 2.2                                                   | 2.1  | 2.2  | 2.1  | 2.2  | 2.3  | 1.9   | 2.4   | 2.2   | 2.4  |
|                      | A/G          | 1.68                                                  | 1.86 | 1.73 | 1.76 | 1.68 | 1.57 | 2.05  | 1.54  | 1.73  | 1.54 |
|                      | CA (mg/dL)   | 9.2                                                   | 9.5  | 9.2  | 9.2  | 9.1  | 9.1  | 9.3   | 9.4   | 9.7   | 9.4  |
|                      | PHOS (mg/dL) | 6.9                                                   | 6.5  | 6.6  | 6.7  | 7.4  | 6.9  | 6.4   | 6.3   | 7.7   | 7.6  |
|                      | ALD (U/L)    | 40.6                                                  | 14.2 | 33.9 | 18.4 | 34.6 | 16.1 | 12.8  | 17.6  | 15.7  | 17.1 |
|                      | CKMM (U/L)   | 1695                                                  | 141  | 1034 | 66   | 1084 | 87   | 119   | 271   | 83    | 290  |
|                      | CKM% (%)     | 93.2                                                  | 59.6 | 87.4 | 54.5 | 86.7 | 53.8 | 56.7  | 75.2  | 55.7  | 78.5 |
|                      | CKMB (U/L)   | 62                                                    | 41   | 51   | 25   | 69   | 37   | 36    | 24    | 34    | 36   |
| CMB% (%)             | 3.4          | 17.2                                                  | 4.3  | 20.3 | 5.5  | 22.7 | 17.0 | 6.7   | 22.9  | 9.6   |      |
| CKBB (U/L)           | 62           | 55                                                    | 98   | 31   | 98   | 38   | 55   | 65    | 32    | 44    |      |
| CKB% (%)             | 3.4          | 23.2                                                  | 8.3  | 25.2 | 7.8  | 23.5 | 26.2 | 18.0  | 21.5  | 11.9  |      |
| COMMENT              | N/A          | N/A                                                   | N/A  | N/A  | N/A  | N/A  | N/A  | N/A   | N/A   | N/A   |      |

|                                                         | Group (Necropsy Day)        | Group 7 (Necropsy Day 180±5)                          |       |       |       |       |       |       |       |       |       |
|---------------------------------------------------------|-----------------------------|-------------------------------------------------------|-------|-------|-------|-------|-------|-------|-------|-------|-------|
|                                                         | Animal ID (Sex)             | 18-181 (Female)                                       |       |       |       |       |       |       |       |       |       |
|                                                         | Treatment (Dose)            | GTP-206 (1.5 x 10 <sup>13</sup> GC/Animal – Mid-Dose) |       |       |       |       |       |       |       |       |       |
|                                                         | Study Day                   | BL                                                    | 0     | 7±1   | 14±2  | 28±3  | 60±3  | 90±4  | 120±4 | 150±4 | 180±5 |
| Complete Blood Counts (Hematology) & Plasma Coagulation | WBC (10 <sup>3</sup> /μL)   | 7.97                                                  | 9.12  | 6.80  | 8.67  | 8.69  | 11.04 | 8.43  | 7.08  | 5.18  | 6.06  |
|                                                         | RBC (10 <sup>6</sup> /μL)   | 5.78                                                  | 5.77  | 5.65  | 5.60  | 5.80  | 5.84  | 5.73  | 5.06  | 6.09  | 5.84  |
|                                                         | HB (g/dL)                   | 13.2                                                  | 13.2  | 12.8  | 12.4  | 13.0  | 13.2  | 12.7  | 11.3  | 13.8  | 12.8  |
|                                                         | HCT (%)                     | 43.7                                                  | 44.1  | 42.8  | 42.5  | 43.4  | 43.4  | 43.1  | 39.6  | 46.3  | 43.4  |
|                                                         | MCV (fL)                    | 75.6                                                  | 76.4  | 75.8  | 75.9  | 74.8  | 74.2  | 75.3  | 78.4  | 76.0  | 74.3  |
|                                                         | MCH (pg)                    | 22.9                                                  | 22.8  | 22.6  | 22.1  | 22.4  | 22.6  | 22.2  | 22.3  | 22.6  | 21.9  |
|                                                         | MCHC (g/dL)                 | 30.3                                                  | 29.9  | 29.9  | 29.1  | 29.9  | 30.4  | 29.6  | 28.4  | 29.7  | 29.4  |
|                                                         | PLT (10 <sup>3</sup> /μL)   | 297                                                   | 250   | 319   | 362   | 291   | 277   | 265   | 323   | 194   | 207   |
|                                                         | NEU% (%)                    | 29.3                                                  | 30.9  | 40.2  | 23.8  | 43.8  | 51.8  | 54.0  | 58.8  | 32.7  | 45.5  |
|                                                         | NEU (10 <sup>3</sup> /μL)   | 2.33                                                  | 2.82  | 2.74  | 2.06  | 3.80  | 5.72  | 4.56  | 4.16  | 1.70  | 2.76  |
|                                                         | LYMPH% (%)                  | 58.4                                                  | 59.9  | 51.2  | 64.9  | 49.5  | 44.4  | 39.8  | 35.1  | 61.1  | 47.9  |
|                                                         | LYMPH (10 <sup>3</sup> /μL) | 4.65                                                  | 5.46  | 3.48  | 5.62  | 4.30  | 4.90  | 3.36  | 2.48  | 3.17  | 2.90  |
|                                                         | MONO% (%)                   | 2.7                                                   | 3.0   | 1.8   | 1.5   | 2.1   | 0.7   | 2.2   | 2.3   | 2.2   | 3.2   |
|                                                         | MONO (10 <sup>3</sup> /μL)  | 0.22                                                  | 0.27  | 0.12  | 0.13  | 0.18  | 0.08  | 0.19  | 0.16  | 0.11  | 0.19  |
|                                                         | EOS% (%)                    | 8.0                                                   | 4.4   | 5.1   | 7.9   | 2.6   | 1.6   | 2.7   | 2.5   | 2.7   | 2.5   |
|                                                         | EOS (10 <sup>3</sup> /μL)   | 0.64                                                  | 0.40  | 0.35  | 0.68  | 0.23  | 0.18  | 0.23  | 0.18  | 0.14  | 0.15  |
|                                                         | BAS% (%)                    | 0.5                                                   | 0.8   | 0.4   | 0.5   | 0.7   | 0.7   | 0.5   | 0.4   | 0.3   | 0.4   |
|                                                         | BAS (10 <sup>3</sup> /μL)   | 0.04                                                  | 0.08  | 0.03  | 0.05  | 0.06  | 0.08  | 0.04  | 0.03  | 0.02  | 0.02  |
|                                                         | LUC% (%)                    | 1.1                                                   | 1.0   | 1.2   | 1.4   | 1.2   | 0.8   | 0.7   | 0.9   | 1.0   | 0.6   |
|                                                         | LUC (10 <sup>3</sup> /μL)   | 0.08                                                  | 0.09  | 0.08  | 0.12  | 0.11  | 0.09  | 0.06  | 0.06  | 0.05  | 0.04  |
|                                                         | MAC                         | +                                                     | +     | +     | +     | N/A   | N/A   | +     | +     | +     | N/A   |
|                                                         | LPLT                        | N/A                                                   | N/A   | N/A   | N/A   | N/A   | N/A   | N/A   | N/A   | N/A   | N/A   |
|                                                         | CPLT                        | N/A                                                   | +     | N/A   | N/A   | +     | N/A   | +     | N/A   | N/A   | N/A   |
| ANIS                                                    | N/A                         | N/A                                                   | N/A   | N/A   | N/A   | N/A   | N/A   | N/A   | N/A   | N/A   |       |
| ATYP                                                    | N/A                         | N/A                                                   | N/A   | N/A   | N/A   | N/A   | N/A   | N/A   | N/A   | N/A   |       |
| COMMENT                                                 | N/A                         | N/A                                                   | N/A   | N/A   | N/A   | N/A   | N/A   | N/A   | N/A   | N/A   |       |
| PT (sec)                                                | 11.4                        | 10.9                                                  | 10.3  | 10.5  | 11.2  | 10.8  | 10.9  | 10.7  | 10.9  | 10.4  |       |
| APTT (sec)                                              | 21.9                        | 22.3                                                  | 20.9  | 22.1  | 22.1  | 21.3  | 21.6  | 20.6  | 21.3  | 21.5  |       |
| FIB (mg/dL)                                             | 172                         | 181                                                   | 211   | 201   | 169   | 181   | 189   | 216   | 158   | 155   |       |
| DIME (ng/mL)                                            | 235.8                       | 210.2                                                 | 228.3 | 312.5 | 330.7 | 379.8 | 227.9 | 1523. | 173.5 | 161.9 |       |
| FDP (FEU)                                               | <2.5                        | <2.5                                                  | <2.5  | <2.5  | <2.5  | <2.5  | <2.5  | <2.5  | <2.5  | <2.5  |       |

| Group (Necropsy Day) |              | Group 7 (Necropsy Day 180±5)                          |      |      |      |      |      |       |       |       |      |
|----------------------|--------------|-------------------------------------------------------|------|------|------|------|------|-------|-------|-------|------|
| Animal ID (Sex)      |              | 18-181 (Female)                                       |      |      |      |      |      |       |       |       |      |
| Treatment (Dose)     |              | GTP-206 (1.5 x 10 <sup>13</sup> GC/Animal – Mid-Dose) |      |      |      |      |      |       |       |       |      |
| Study Day            | BL           | 0                                                     | 7±1  | 14±2 | 28±3 | 60±3 | 90±4 | 120±4 | 150±4 | 180±5 |      |
| Serum Chemistry      | BUN (mg/dL)  | 11                                                    | 23   | 20   | 13   | 26   | 22   | 19    | 23    | 20    | 17   |
|                      | CREA (mg/dL) | 0.6                                                   | 0.5  | 0.5  | 0.5  | 0.4  | 0.5  | 0.5   | 0.5   | 0.6   | 0.6  |
|                      | GLU (mg/dL)  | 96                                                    | 96   | 92   | 88   | 81   | 49   | 46    | 111   | 113   | 117  |
|                      | NA (mmol/L)  | 155                                                   | 147  | 148  | 148  | 147  | 148  | 149   | 150   | 151   | 147  |
|                      | K (mmol/L)   | 3.8                                                   | 3.2  | 3.5  | 3.5  | 3.4  | 3.1  | 3.3   | 3.5   | 3.6   | 3.4  |
|                      | CL (mmol/L)  | 110                                                   | 105  | 108  | 107  | 106  | 108  | 108   | 109   | 112   | 108  |
|                      | ALP (U/L)    | 877                                                   | 808  | 670  | 763  | 684  | 627  | 455   | 428   | 645   | 619  |
|                      | ALT (U/L)    | 23                                                    | 24   | 30   | 57   | 30   | 35   | 29    | 39    | 32    | 25   |
|                      | AST (U/L)    | 27                                                    | 21   | 25   | 45   | 29   | 30   | 26    | 49    | 22    | 23   |
|                      | TBIL (mg/dL) | 0.2                                                   | 0.1  | 0.1  | 0.1  | 0.1  | 0.2  | 0.2   | 0.2   | 0.1   | 0.2  |
|                      | LDH (U/L)    | 356                                                   | 231  | 261  | 494  | 306  | 308  | 275   | 539   | 243   | 257  |
|                      | CPK (U/L)    | 282                                                   | 165  | 194  | 426  | 389  | 396  | 125   | 2690  | 222   | 243  |
|                      | GGT (U/L)    | 68                                                    | 63   | 65   | 65   | 67   | 61   | 53    | 49    | 64    | 60   |
|                      | TPRO (g/dL)  | 6.0                                                   | 6.1  | 6.3  | 5.9  | 5.7  | 6.2  | 6.2   | 6.4   | 6.9   | 6.3  |
|                      | ALB (g/dL)   | 3.9                                                   | 4.0  | 4.1  | 3.7  | 3.8  | 3.8  | 4.0   | 3.7   | 4.5   | 4.1  |
|                      | GLOB (g/dL)  | 2.1                                                   | 2.1  | 2.2  | 2.2  | 1.9  | 2.4  | 2.2   | 2.7   | 2.4   | 2.2  |
|                      | A/G          | 1.86                                                  | 1.90 | 1.86 | 1.68 | 2.00 | 1.58 | 1.82  | 1.37  | 1.88  | 1.86 |
|                      | CA (mg/dL)   | 10.0                                                  | 9.4  | 9.7  | 9.4  | 9.2  | 9.0  | 8.9   | 9.2   | 10.1  | 9.5  |
|                      | PHOS (mg/dL) | 6.3                                                   | 6.3  | 5.1  | 5.9  | 5.5  | 5.6  | 6.5   | 5.8   | 4.6   | 4.9  |
|                      | ALD (U/L)    | 23.6                                                  | 18.7 | 17.9 | 33.5 | 20.6 | 18.8 | 22.8  | 51.5  | 16.0  | 14.4 |
|                      | CKMM (U/L)   | QNS                                                   | 67   | 108  | 312  | 269  | 275  | 72    | 2566  | 151   | 188  |
|                      | CKM% (%)     | QNS                                                   | 40.8 | 55.9 | 73.2 | 69.2 | 69.4 | 57.3  | 95.4  | 68.0  | 77.3 |
|                      | CKMB (U/L)   | QNS                                                   | 39   | 40   | 43   | 53   | 55   | 23    | 70    | 33    | 30   |
| CMB% (%)             | QNS          | 23.6                                                  | 20.8 | 10.0 | 13.6 | 14.0 | 18.2 | 2.6   | 15.0  | 12.2  |      |
| CKBB (U/L)           | QNS          | 59                                                    | 45   | 72   | 67   | 66   | 31   | 51    | 38    | 26    |      |
| CKB% (%)             | QNS          | 35.6                                                  | 23.4 | 16.8 | 17.2 | 16.6 | 24.5 | 1.9   | 17.0  | 10.5  |      |
| COMMENT              | N/A          | N/A                                                   | N/A  | N/A  | N/A  | N/A  | N/A  | N/A   | N/A   | N/A   |      |

|                                                         | Group (Necropsy Day)        | Group 7 (Necropsy Day 180±5)                          |       |       |       |       |       |       |       |       |       |
|---------------------------------------------------------|-----------------------------|-------------------------------------------------------|-------|-------|-------|-------|-------|-------|-------|-------|-------|
|                                                         | Animal ID (Sex)             | 18-183 (Female)                                       |       |       |       |       |       |       |       |       |       |
|                                                         | Treatment (Dose)            | GTP-206 (1.5 x 10 <sup>13</sup> GC/Animal – Mid-Dose) |       |       |       |       |       |       |       |       |       |
|                                                         | Study Day                   | BL                                                    | 0     | 7±1   | 14±2  | 28±3  | 60±3  | 90±4  | 120±4 | 150±4 | 180±5 |
| Complete Blood Counts (Hematology) & Plasma Coagulation | WBC (10 <sup>3</sup> /μL)   | 10.52                                                 | 9.72  | 12.40 | 11.29 | 10.47 | 10.99 | 9.93  | 10.44 | 9.09  | 10.89 |
|                                                         | RBC (10 <sup>6</sup> /μL)   | 5.40                                                  | 5.45  | 5.10  | 5.37  | 5.44  | 5.54  | 5.29  | 5.52  | 5.37  | 5.29  |
|                                                         | HB (g/dL)                   | 12.5                                                  | 12.5  | 11.7  | 12.0  | 12.6  | 12.3  | 12.1  | 12.2  | 12.2  | 11.9  |
|                                                         | HCT (%)                     | 41.0                                                  | 41.8  | 39.5  | 41.3  | 41.2  | 41.8  | 40.2  | 41.9  | 41.0  | 40.2  |
|                                                         | MCV (fL)                    | 76.1                                                  | 76.7  | 77.4  | 77.0  | 75.7  | 75.3  | 76.0  | 75.9  | 76.3  | 75.9  |
|                                                         | MCH (pg)                    | 23.2                                                  | 22.9  | 22.9  | 22.3  | 23.1  | 22.2  | 22.8  | 22.1  | 22.7  | 22.6  |
|                                                         | MCHC (g/dL)                 | 30.5                                                  | 29.9  | 29.6  | 29.0  | 30.5  | 29.5  | 30.0  | 29.2  | 29.8  | 29.7  |
|                                                         | PLT (10 <sup>3</sup> /μL)   | 482                                                   | 415   | 581   | 573   | 492   | 403   | 452   | 572   | 487   | 499   |
|                                                         | NEU% (%)                    | 49.6                                                  | 47.6  | 64.2  | 48.0  | 66.7  | 63.0  | 66.8  | 41.5  | 56.7  | 67.2  |
|                                                         | NEU (10 <sup>3</sup> /μL)   | 5.22                                                  | 4.63  | 7.97  | 5.41  | 6.98  | 6.92  | 6.64  | 4.34  | 5.15  | 7.31  |
|                                                         | LYMPH% (%)                  | 45.8                                                  | 42.9  | 32.6  | 48.1  | 25.9  | 31.5  | 27.2  | 54.6  | 40.1  | 30.1  |
|                                                         | LYMPH (10 <sup>3</sup> /μL) | 4.82                                                  | 4.17  | 4.04  | 5.43  | 2.71  | 3.47  | 2.70  | 5.70  | 3.65  | 3.27  |
|                                                         | MONO% (%)                   | 2.6                                                   | 6.7   | 1.7   | 1.3   | 5.5   | 3.3   | 4.2   | 1.9   | 2.0   | 1.8   |
|                                                         | MONO (10 <sup>3</sup> /μL)  | 0.28                                                  | 0.65  | 0.21  | 0.14  | 0.58  | 0.37  | 0.42  | 0.20  | 0.18  | 0.19  |
|                                                         | EOS% (%)                    | 1.1                                                   | 0.7   | 0.6   | 1.1   | 0.4   | 0.5   | 0.5   | 0.8   | 0.5   | 0.3   |
|                                                         | EOS (10 <sup>3</sup> /μL)   | 0.11                                                  | 0.07  | 0.07  | 0.13  | 0.04  | 0.05  | 0.05  | 0.08  | 0.05  | 0.04  |
|                                                         | BAS% (%)                    | 0.4                                                   | 1.3   | 0.4   | 0.7   | 0.8   | 1.0   | 0.8   | 0.6   | 0.3   | 0.3   |
|                                                         | BAS (10 <sup>3</sup> /μL)   | 0.04                                                  | 0.12  | 0.04  | 0.08  | 0.08  | 0.11  | 0.08  | 0.06  | 0.03  | 0.03  |
|                                                         | LUC% (%)                    | 0.5                                                   | 0.7   | 0.6   | 0.9   | 0.7   | 0.7   | 0.5   | 0.6   | 0.4   | 0.3   |
|                                                         | LUC (10 <sup>3</sup> /μL)   | 0.05                                                  | 0.07  | 0.07  | 0.10  | 0.08  | 0.07  | 0.05  | 0.07  | 0.04  | 0.04  |
|                                                         | MAC                         | +                                                     | +     | +     | +     | +     | +     | +     | +     | +     | +     |
|                                                         | LPLT                        | N/A                                                   | N/A   | N/A   | N/A   | N/A   | N/A   | N/A   | N/A   | N/A   | N/A   |
|                                                         | CPLT                        | N/A                                                   | +     | N/A   | N/A   | +     | +     | +     | N/A   | N/A   | N/A   |
|                                                         | ANIS                        | N/A                                                   | N/A   | N/A   | N/A   | N/A   | N/A   | N/A   | N/A   | N/A   | N/A   |
|                                                         | ATYP                        | N/A                                                   | N/A   | N/A   | N/A   | N/A   | N/A   | N/A   | N/A   | N/A   | N/A   |
| COMMENT                                                 | HEM                         | HEM                                                   | N/A   | HEM   | HEM   | N/A   | N/A   | N/A   | N/A   | N/A   |       |
| PT (sec)                                                | 11.1                        | 10.8                                                  | 10.3  | 10.4  | 10.1  | 10.8  | 11.6  | 10.5  | 11.0  | 9.9   |       |
| APTT (sec)                                              | 22.3                        | 22.1                                                  | 21.8  | 21.8  | 21.2  | 23.4  | 23.3  | 21.2  | 21.9  | 21.1  |       |
| FIB (mg/dL)                                             | 158                         | 174                                                   | 218   | 189   | 141   | 193   | 183   | 183   | 161   | 161   |       |
| DIME (ng/mL)                                            | 283.6                       | 552.8                                                 | 463.4 | 291.8 | 1477. | 506.4 | 297.1 | 417.2 | 300.6 | 605.0 |       |
| FDP (FEU)                                               | <2.5                        | <2.5                                                  | <2.5  | <2.5  | <2.5  | 2.5   | <2.5  | <2.5  | <2.5  | <2.5  |       |

| Group (Necropsy Day) |              | Group 7 (Necropsy Day 180±5)                          |      |      |      |      |      |       |       |       |      |
|----------------------|--------------|-------------------------------------------------------|------|------|------|------|------|-------|-------|-------|------|
| Animal ID (Sex)      |              | 18-183 (Female)                                       |      |      |      |      |      |       |       |       |      |
| Treatment (Dose)     |              | GTP-206 (1.5 x 10 <sup>13</sup> GC/Animal – Mid-Dose) |      |      |      |      |      |       |       |       |      |
| Study Day            | BL           | 0                                                     | 7±1  | 14±2 | 28±3 | 60±3 | 90±4 | 120±4 | 150±4 | 180±5 |      |
| Serum Chemistry      | BUN (mg/dL)  | QNS                                                   | 21   | 20   | 15   | 20   | 21   | 21    | 22    | 23    | 21   |
|                      | CREA (mg/dL) | 0.5                                                   | 0.4  | 0.4  | 0.4  | 0.4  | 0.4  | 0.4   | 0.4   | 0.5   | 0.5  |
|                      | GLU (mg/dL)  | QNS                                                   | 103  | 134  | 89   | 75   | 67   | 99    | 104   | 106   | 116  |
|                      | NA (mmol/L)  | 154                                                   | 146  | 145  | 145  | 145  | 145  | 146   | 147   | 154   | 147  |
|                      | K (mmol/L)   | 4.0                                                   | 3.5  | 3.6  | 4.0  | 3.9  | 3.3  | 3.5   | 3.5   | 3.8   | 3.5  |
|                      | CL (mmol/L)  | 109                                                   | 106  | 108  | 104  | 106  | 105  | 106   | 107   | 112   | 108  |
|                      | ALP (U/L)    | 830                                                   | 908  | 734  | 1011 | 939  | 867  | 722   | 840   | 915   | 789  |
|                      | ALT (U/L)    | 33                                                    | 31   | 35   | 39   | 40   | 41   | 30    | 34    | 31    | 28   |
|                      | AST (U/L)    | 38                                                    | 28   | 28   | 39   | 37   | 35   | 24    | 29    | 33    | 25   |
|                      | TBIL (mg/dL) | 0.2                                                   | 0.2  | 0.1  | 0.2  | 0.2  | 0.2  | 0.2   | 0.2   | 0.2   | 0.2  |
|                      | LDH (U/L)    | QNS                                                   | 279  | 326  | 590  | 329  | 344  | 270   | 319   | 375   | 304  |
|                      | CPK (U/L)    | 729                                                   | 227  | 214  | 255  | 231  | 441  | 214   | 258   | 791   | 416  |
|                      | GGT (U/L)    | 62                                                    | 68   | 70   | 69   | 74   | 70   | 65    | 69    | 73    | 62   |
|                      | TPRO (g/dL)  | QNS                                                   | 6.5  | 6.4  | 6.1  | 6.3  | 6.3  | 6.3   | 6.1   | 6.7   | 6.2  |
|                      | ALB (g/dL)   | 4.2                                                   | 4.4  | 4.1  | 4.0  | 4.3  | 4.0  | 4.3   | 4.1   | 4.7   | 4.3  |
|                      | GLOB (g/dL)  | QNS                                                   | 2.1  | 2.3  | 2.1  | 2.0  | 2.3  | 2.0   | 2.0   | 2.0   | 1.9  |
|                      | A/G          | QNS                                                   | 2.10 | 1.78 | 1.90 | 2.15 | 1.74 | 2.15  | 2.05  | 2.35  | 2.26 |
|                      | CA (mg/dL)   | 9.9                                                   | 9.6  | 9.4  | 9.5  | 9.6  | 9.3  | 9.4   | 9.8   | 10.5  | 9.5  |
|                      | PHOS (mg/dL) | 5.4                                                   | 5.8  | 5.9  | 6.8  | 5.1  | 6.4  | 5.4   | 5.8   | 6.3   | 5.7  |
|                      | ALD (U/L)    | QNS                                                   | 17.9 | 21.2 | 30.1 | 21.7 | 21.3 | 17.7  | 21.6  | 21.6  | 19.7 |
|                      | CKMM (U/L)   | QNS                                                   | 129  | 136  | 155  | 142  | 331  | 155   | 190   | 665   | 301  |
|                      | CKM% (%)     | QNS                                                   | 56.8 | 63.4 | 60.9 | 61.3 | 75.1 | 72.5  | 73.7  | 84.1  | 72.3 |
|                      | CKMB (U/L)   | QNS                                                   | 37   | 38   | 27   | 36   | 42   | 24    | 23    | 51    | 68   |
| CMB% (%)             | QNS          | 16.2                                                  | 17.9 | 10.5 | 15.6 | 9.6  | 11.2 | 8.9   | 6.5   | 16.3  |      |
| CKBB (U/L)           | QNS          | 61                                                    | 40   | 73   | 53   | 67   | 35   | 45    | 74    | 47    |      |
| CKB% (%)             | QNS          | 27.0                                                  | 18.7 | 28.6 | 23.1 | 15.3 | 16.2 | 17.4  | 9.4   | 11.3  |      |
| COMMENT              | N/A          | N/A                                                   | N/A  | N/A  | N/A  | N/A  | N/A  | N/A   | N/A   | N/A   |      |

|                                                         | Group (Necropsy Day)        | Group 4 (Necropsy Day 90±4)                            |       |       |       |       |       |      |       |       |       |
|---------------------------------------------------------|-----------------------------|--------------------------------------------------------|-------|-------|-------|-------|-------|------|-------|-------|-------|
|                                                         | Animal ID (Sex)             | 18-080 (Male)                                          |       |       |       |       |       |      |       |       |       |
|                                                         | Treatment (Dose)            | GTP-206 (4.5 x 10 <sup>13</sup> GC/Animal – High Dose) |       |       |       |       |       |      |       |       |       |
|                                                         | Study Day                   | BL                                                     | 0     | 7±1   | 14±2  | 28±3  | 60±3  | 90±4 | 120±4 | 150±4 | 180±5 |
| Complete Blood Counts (Hematology) & Plasma Coagulation | WBC (10 <sup>3</sup> /μL)   | 7.08                                                   | 11.30 | 9.99  | 12.20 | 11.31 | 8.30  | 7.32 | N/A   | N/A   | N/A   |
|                                                         | RBC (10 <sup>6</sup> /μL)   | 6.00                                                   | 5.58  | 5.88  | 5.95  | 5.88  | 6.05  | 5.90 | N/A   | N/A   | N/A   |
|                                                         | HB (g/dL)                   | 13.1                                                   | 12.5  | 13.1  | 12.9  | 12.7  | 13.4  | 12.8 | N/A   | N/A   | N/A   |
|                                                         | HCT (%)                     | 43.8                                                   | 40.2  | 42.7  | 43.0  | 41.9  | 43.7  | 41.8 | N/A   | N/A   | N/A   |
|                                                         | MCV (fL)                    | 73.0                                                   | 72.1  | 72.5  | 72.2  | 71.3  | 72.1  | 70.9 | N/A   | N/A   | N/A   |
|                                                         | MCH (pg)                    | 21.9                                                   | 22.4  | 22.2  | 21.8  | 21.7  | 22.2  | 21.8 | N/A   | N/A   | N/A   |
|                                                         | MCHC (g/dL)                 | 30.0                                                   | 31.1  | 30.7  | 30.1  | 30.4  | 30.7  | 30.7 | N/A   | N/A   | N/A   |
|                                                         | PLT (10 <sup>3</sup> /μL)   | 75                                                     | 557   | 513   | 461   | 446   | 516   | 492  | N/A   | N/A   | N/A   |
|                                                         | NEU% (%)                    | 58.8                                                   | 46.3  | 46.9  | 48.1  | 72.7  | 43.7  | 55.2 | N/A   | N/A   | N/A   |
|                                                         | NEU (10 <sup>3</sup> /μL)   | 4.16                                                   | 5.23  | 4.69  | 5.86  | 8.22  | 3.63  | 4.04 | N/A   | N/A   | N/A   |
|                                                         | LYMPH% (%)                  | 37.6                                                   | 47.9  | 49.5  | 46.5  | 25.0  | 51.3  | 41.5 | N/A   | N/A   | N/A   |
|                                                         | LYMPH (10 <sup>3</sup> /μL) | 2.66                                                   | 5.41  | 4.95  | 5.67  | 2.83  | 4.26  | 3.04 | N/A   | N/A   | N/A   |
|                                                         | MONO% (%)                   | 1.4                                                    | 2.3   | 1.2   | 2.0   | 0.6   | 2.1   | 1.1  | N/A   | N/A   | N/A   |
|                                                         | MONO (10 <sup>3</sup> /μL)  | 0.10                                                   | 0.26  | 0.12  | 0.24  | 0.07  | 0.17  | 0.08 | N/A   | N/A   | N/A   |
|                                                         | EOS% (%)                    | 1.0                                                    | 1.2   | 0.5   | 1.9   | 0.5   | 1.2   | 0.6  | N/A   | N/A   | N/A   |
|                                                         | EOS (10 <sup>3</sup> /μL)   | 0.07                                                   | 0.14  | 0.05  | 0.23  | 0.05  | 0.10  | 0.04 | N/A   | N/A   | N/A   |
|                                                         | BAS% (%)                    | 0.5                                                    | 0.7   | 0.8   | 0.8   | 0.8   | 0.4   | 0.4  | N/A   | N/A   | N/A   |
|                                                         | BAS (10 <sup>3</sup> /μL)   | 0.03                                                   | 0.07  | 0.08  | 0.09  | 0.09  | 0.03  | 0.03 | N/A   | N/A   | N/A   |
|                                                         | LUC% (%)                    | 0.7                                                    | 1.6   | 1.0   | 0.9   | 0.4   | 1.3   | 1.2  | N/A   | N/A   | N/A   |
|                                                         | LUC (10 <sup>3</sup> /μL)   | 0.05                                                   | 0.18  | 0.10  | 0.11  | 0.04  | 0.10  | 0.09 | N/A   | N/A   | N/A   |
|                                                         | MAC                         | N/A                                                    | N/A   | N/A   | N/A   | N/A   | N/A   | N/A  | N/A   | N/A   | N/A   |
|                                                         | LPLT                        | N/A                                                    | N/A   | N/A   | N/A   | N/A   | N/A   | N/A  | N/A   | N/A   | N/A   |
|                                                         | CPLT                        | N/A                                                    | N/A   | N/A   | N/A   | N/A   | N/A   | N/A  | N/A   | N/A   | N/A   |
| ANIS                                                    | N/A                         | N/A                                                    | N/A   | N/A   | N/A   | N/A   | N/A   | N/A  | N/A   | N/A   |       |
| ATYP                                                    | N/A                         | N/A                                                    | N/A   | N/A   | N/A   | N/A   | N/A   | N/A  | N/A   | N/A   |       |
| COMMENT                                                 | N/A                         | N/A                                                    | HEM   | N/A   | N/A   | N/A   | N/A   | N/A  | N/A   | N/A   |       |
| PT (sec)                                                | 10.3                        | 10.2                                                   | 10.0  | 10.3  | 9.9   | 10.7  | 10.6  | N/A  | N/A   | N/A   |       |
| APTT (sec)                                              | 19.9                        | 20.3                                                   | 20.7  | 22.7  | 20.8  | 20.7  | 20.7  | N/A  | N/A   | N/A   |       |
| FIB (mg/dL)                                             | 171                         | 195                                                    | 244   | 179   | 224   | 149   | 143   | N/A  | N/A   | N/A   |       |
| DIME (ng/mL)                                            | 447.3                       | 389.9                                                  | 426.8 | 417.5 | 2231. | 360.0 | 398.2 | N/A  | N/A   | N/A   |       |
| FDP (FEU)                                               | <2.5                        | <2.5                                                   | <2.5  | <2.5  | 5.0   | <2.5  | <2.5  | N/A  | N/A   | N/A   |       |

| Group (Necropsy Day) |              | Group 4 (Necropsy Day 90±4)                            |      |      |      |      |      |       |       |       |     |
|----------------------|--------------|--------------------------------------------------------|------|------|------|------|------|-------|-------|-------|-----|
| Animal ID (Sex)      |              | 18-080 (Male)                                          |      |      |      |      |      |       |       |       |     |
| Treatment (Dose)     |              | GTP-206 (4.5 x 10 <sup>13</sup> GC/Animal – High Dose) |      |      |      |      |      |       |       |       |     |
| Study Day            | BL           | 0                                                      | 7±1  | 14±2 | 28±3 | 60±3 | 90±4 | 120±4 | 150±4 | 180±5 |     |
| Serum Chemistry      | BUN (mg/dL)  | 19                                                     | 19   | 19   | 17   | 17   | 20   | 18    | N/A   | N/A   | N/A |
|                      | CREA (mg/dL) | 0.5                                                    | 0.5  | 0.5  | 0.5  | 0.5  | 0.4  | 0.4   | N/A   | N/A   | N/A |
|                      | GLU (mg/dL)  | 99                                                     | 79   | 107  | 99   | 90   | 74   | 106   | N/A   | N/A   | N/A |
|                      | NA (mmol/L)  | 149                                                    | 147  | 147  | 147  | 147  | 146  | 152   | N/A   | N/A   | N/A |
|                      | K (mmol/L)   | 3.1                                                    | 3.6  | 3.3  | 3.2  | 3.1  | 3.4  | 2.9   | N/A   | N/A   | N/A |
|                      | CL (mmol/L)  | 108                                                    | 108  | 108  | 105  | 108  | 106  | 110   | N/A   | N/A   | N/A |
|                      | ALP (U/L)    | 804                                                    | 629  | 683  | 684  | 718  | 959  | 912   | N/A   | N/A   | N/A |
|                      | ALT (U/L)    | 28                                                     | 25   | 51   | 50   | 98   | 35   | 35    | N/A   | N/A   | N/A |
|                      | AST (U/L)    | 27                                                     | 38   | 28   | 47   | 80   | 32   | 28    | N/A   | N/A   | N/A |
|                      | TBIL (mg/dL) | 0.2                                                    | 0.2  | 0.2  | 0.2  | 0.1  | 0.2  | 0.2   | N/A   | N/A   | N/A |
|                      | LDH (U/L)    | 227                                                    | 304  | 231  | 298  | 391  | 210  | 198   | N/A   | N/A   | N/A |
|                      | CPK (U/L)    | 122                                                    | 1443 | 129  | 270  | 316  | 153  | 160   | N/A   | N/A   | N/A |
|                      | GGT (U/L)    | 62                                                     | 57   | 60   | 60   | 64   | 71   | 62    | N/A   | N/A   | N/A |
|                      | TPRO (g/dL)  | 6.5                                                    | 6.1  | 6.5  | 6.3  | 6.6  | 6.5  | 5.9   | N/A   | N/A   | N/A |
|                      | ALB (g/dL)   | 4.0                                                    | 4.0  | 3.9  | 3.9  | 3.9  | 4.1  | 3.8   | N/A   | N/A   | N/A |
|                      | GLOB (g/dL)  | 2.5                                                    | 2.1  | 2.6  | 2.4  | 2.7  | 2.4  | 2.1   | N/A   | N/A   | N/A |
|                      | A/G          | 1.60                                                   | 1.90 | 1.50 | 1.63 | 1.44 | 1.71 | 1.81  | N/A   | N/A   | N/A |
|                      | CA (mg/dL)   | 10.0                                                   | 10.2 | 10.2 | 10.3 | 9.8  | 9.8  | 9.4   | N/A   | N/A   | N/A |
|                      | PHOS (mg/dL) | 5.4                                                    | 6.2  | 5.7  | 5.7  | 4.8  | 6.5  | 6.3   | N/A   | N/A   | N/A |
|                      | ALD (U/L)    | 12.4                                                   | 28.1 | 12.0 | 16.8 | 53.6 | 12.2 | 13.8  | N/A   | N/A   | N/A |
|                      | CKMM (U/L)   | 76                                                     | 1234 | 75   | 180  | 270  | 79   | 88    | N/A   | N/A   | N/A |
| CKM% (%)             | 62.4         | 85.5                                                   | 57.8 | 66.8 | 85.4 | 51.8 | 54.8 | N/A   | N/A   | N/A   |     |
| CKMB (U/L)           | 26           | 84                                                     | 29   | 45   | 22   | 39   | 38   | N/A   | N/A   | N/A   |     |
| CMB% (%)             | 21.0         | 5.8                                                    | 22.6 | 16.5 | 6.9  | 25.7 | 23.7 | N/A   | N/A   | N/A   |     |
| CKBB (U/L)           | 20           | 126                                                    | 25   | 45   | 24   | 34   | 34   | N/A   | N/A   | N/A   |     |
| CKB% (%)             | 16.7         | 8.7                                                    | 19.7 | 16.7 | 7.7  | 22.5 | 21.5 | N/A   | N/A   | N/A   |     |
| COMMENT              | N/A          | N/A                                                    | N/A  | N/A  | N/A  | N/A  | N/A  | N/A   | N/A   | N/A   |     |

|                                                         | Group (Necropsy Day)        | Group 4 (Necropsy Day 90±4)                            |       |       |       |       |       |       |       |       |       |
|---------------------------------------------------------|-----------------------------|--------------------------------------------------------|-------|-------|-------|-------|-------|-------|-------|-------|-------|
|                                                         | Animal ID (Sex)             | 18-166 (Male)                                          |       |       |       |       |       |       |       |       |       |
|                                                         | Treatment (Dose)            | GTP-206 (4.5 x 10 <sup>13</sup> GC/Animal – High Dose) |       |       |       |       |       |       |       |       |       |
|                                                         | Study Day                   | BL                                                     | 0     | 7±1   | 14±2  | 28±3  | 60±3  | 90±4  | 120±4 | 150±4 | 180±5 |
| Complete Blood Counts (Hematology) & Plasma Coagulation | WBC (10 <sup>3</sup> /μL)   | 10.34                                                  | 11.73 | 14.18 | 12.60 | 12.37 | 13.48 | 12.72 | N/A   | N/A   | N/A   |
|                                                         | RBC (10 <sup>6</sup> /μL)   | 5.90                                                   | 5.37  | 5.22  | 4.78  | 5.97  | 6.00  | 5.75  | N/A   | N/A   | N/A   |
|                                                         | HB (g/dL)                   | 13.3                                                   | 11.7  | 11.2  | 10.7  | 12.9  | 12.8  | 12.5  | N/A   | N/A   | N/A   |
|                                                         | HCT (%)                     | 43.2                                                   | 41.4  | 38.6  | 36.2  | 44.8  | 43.5  | 42.1  | N/A   | N/A   | N/A   |
|                                                         | MCV (fL)                    | 73.3                                                   | 77.1  | 74.1  | 75.8  | 75.1  | 72.4  | 73.3  | N/A   | N/A   | N/A   |
|                                                         | MCH (pg)                    | 22.6                                                   | 21.8  | 21.4  | 22.4  | 21.6  | 21.4  | 21.7  | N/A   | N/A   | N/A   |
|                                                         | MCHC (g/dL)                 | 30.8                                                   | 28.3  | 28.9  | 29.6  | 28.8  | 29.5  | 29.6  | N/A   | N/A   | N/A   |
|                                                         | PLT (10 <sup>3</sup> /μL)   | 432                                                    | 283   | 305   | 447   | 364   | 387   | 315   | N/A   | N/A   | N/A   |
|                                                         | NEU% (%)                    | 16.6                                                   | 27.4  | 51.2  | 38.6  | 69.7  | 70.0  | 65.3  | N/A   | N/A   | N/A   |
|                                                         | NEU (10 <sup>3</sup> /μL)   | 1.71                                                   | 3.21  | 7.26  | 4.86  | 8.62  | 9.44  | 8.31  | N/A   | N/A   | N/A   |
|                                                         | LYMPH% (%)                  | 73.6                                                   | 63.9  | 40.2  | 56.3  | 25.0  | 25.7  | 26.6  | N/A   | N/A   | N/A   |
|                                                         | LYMPH (10 <sup>3</sup> /μL) | 7.61                                                   | 7.50  | 5.70  | 7.09  | 3.09  | 3.47  | 3.38  | N/A   | N/A   | N/A   |
|                                                         | MONO% (%)                   | 4.3                                                    | 4.7   | 5.4   | 1.5   | 2.1   | 1.7   | 4.6   | N/A   | N/A   | N/A   |
|                                                         | MONO (10 <sup>3</sup> /μL)  | 0.44                                                   | 0.55  | 0.77  | 0.19  | 0.26  | 0.23  | 0.59  | N/A   | N/A   | N/A   |
|                                                         | EOS% (%)                    | 3.2                                                    | 2.2   | 1.0   | 1.5   | 1.2   | 1.2   | 1.9   | N/A   | N/A   | N/A   |
|                                                         | EOS (10 <sup>3</sup> /μL)   | 0.34                                                   | 0.26  | 0.14  | 0.19  | 0.15  | 0.17  | 0.24  | N/A   | N/A   | N/A   |
|                                                         | BAS% (%)                    | 0.8                                                    | 0.7   | 1.1   | 1.0   | 1.3   | 0.8   | 1.1   | N/A   | N/A   | N/A   |
|                                                         | BAS (10 <sup>3</sup> /μL)   | 0.09                                                   | 0.08  | 0.16  | 0.13  | 0.16  | 0.11  | 0.14  | N/A   | N/A   | N/A   |
|                                                         | LUC% (%)                    | 1.5                                                    | 1.1   | 1.1   | 1.1   | 0.6   | 0.5   | 0.6   | N/A   | N/A   | N/A   |
|                                                         | LUC (10 <sup>3</sup> /μL)   | 0.15                                                   | 0.13  | 0.16  | 0.14  | 0.07  | 0.07  | 0.07  | N/A   | N/A   | N/A   |
|                                                         | MAC                         | N/A                                                    | +     | N/A   | +     | +     | N/A   | N/A   | N/A   | N/A   | N/A   |
|                                                         | LPLT                        | N/A                                                    | N/A   | N/A   | N/A   | N/A   | N/A   | N/A   | N/A   | N/A   | N/A   |
|                                                         | CPLT                        | +                                                      | +     | +     | N/A   | +     | +     | +     | N/A   | N/A   | N/A   |
| ANIS                                                    | N/A                         | N/A                                                    | N/A   | +     | N/A   | N/A   | +     | N/A   | N/A   | N/A   |       |
| ATYP                                                    | N/A                         | N/A                                                    | N/A   | N/A   | N/A   | N/A   | N/A   | N/A   | N/A   | N/A   |       |
| COMMENT                                                 | N/A                         | N/A                                                    | TRB   | N/A   | N/A   | N/A   | N/A   | N/A   | N/A   | N/A   |       |
| PT (sec)                                                | 11.3                        | 10.9                                                   | 9.7   | 10.3  | 10.8  | 10.4  | 10.7  | N/A   | N/A   | N/A   |       |
| APTT (sec)                                              | 20.5                        | 21.9                                                   | 21.6  | 20.7  | 22.2  | 20.3  | 20.8  | N/A   | N/A   | N/A   |       |
| FIB (mg/dL)                                             | 142                         | 138                                                    | 398   | 161   | 136   | 142   | 129   | N/A   | N/A   | N/A   |       |
| DIME (ng/mL)                                            | 256.7                       | 222.4                                                  | 2579. | 2274. | 466.9 | 220.0 | 543.9 | N/A   | N/A   | N/A   |       |
| FDP (FEU)                                               | <2.5                        | <2.5                                                   | 10.0  | 5.0   | <2.5  | <2.5  | <2.5  | N/A   | N/A   | N/A   |       |



| Group (Necropsy Day) |              | Group 4 (Necropsy Day 90±4)                            |      |       |      |      |      |       |       |       |     |
|----------------------|--------------|--------------------------------------------------------|------|-------|------|------|------|-------|-------|-------|-----|
| Animal ID (Sex)      |              | 18-166 (Male)                                          |      |       |      |      |      |       |       |       |     |
| Treatment (Dose)     |              | GTP-206 (4.5 x 10 <sup>13</sup> GC/Animal – High Dose) |      |       |      |      |      |       |       |       |     |
| Study Day            | BL           | 0                                                      | 7±1  | 14±2  | 28±3 | 60±3 | 90±4 | 120±4 | 150±4 | 180±5 |     |
| Serum Chemistry      | BUN (mg/dL)  | 27                                                     | 22   | 17    | 22   | 24   | 27   | 18    | N/A   | N/A   | N/A |
|                      | CREA (mg/dL) | 0.5                                                    | 0.5  | 0.5   | 0.5  | 0.5  | 0.5  | 0.4   | N/A   | N/A   | N/A |
|                      | GLU (mg/dL)  | 93                                                     | 111  | 82    | 74   | 74   | 90   | 148   | N/A   | N/A   | N/A |
|                      | NA (mmol/L)  | 147                                                    | 145  | 140   | 146  | 147  | 147  | 148   | N/A   | N/A   | N/A |
|                      | K (mmol/L)   | 4.1                                                    | 3.7  | 5.3   | 3.3  | 3.9  | 3.5  | 3.9   | N/A   | N/A   | N/A |
|                      | CL (mmol/L)  | 104                                                    | 104  | 102   | 104  | 105  | 108  | 105   | N/A   | N/A   | N/A |
|                      | ALP (U/L)    | 681                                                    | 642  | 343   | 572  | 717  | 724  | 852   | N/A   | N/A   | N/A |
|                      | ALT (U/L)    | 33                                                     | 25   | 97    | 67   | 24   | 27   | 31    | N/A   | N/A   | N/A |
|                      | AST (U/L)    | 62                                                     | 34   | 157   | 36   | 32   | 28   | 40    | N/A   | N/A   | N/A |
|                      | TBIL (mg/dL) | 0.2                                                    | 0.1  | 0.2   | 0.1  | 0.2  | 0.1  | 0.1   | N/A   | N/A   | N/A |
|                      | LDH (U/L)    | 591                                                    | 367  | 758   | 311  | 273  | 210  | 341   | N/A   | N/A   | N/A |
|                      | CPK (U/L)    | 3964                                                   | 514  | 3266  | 150  | 451  | 181  | 1906  | N/A   | N/A   | N/A |
|                      | GGT (U/L)    | 62                                                     | 55   | 34    | 55   | 64   | 58   | 70    | N/A   | N/A   | N/A |
|                      | TPRO (g/dL)  | 5.6                                                    | 5.7  | 6.1   | 5.9  | 6.3  | 6.1  | 5.7   | N/A   | N/A   | N/A |
|                      | ALB (g/dL)   | 4.2                                                    | 4.0  | 3.3   | 3.5  | 4.2  | 4.1  | 4.0   | N/A   | N/A   | N/A |
|                      | GLOB (g/dL)  | 1.4                                                    | 1.7  | 2.8   | 2.4  | 2.1  | 2.0  | 1.7   | N/A   | N/A   | N/A |
|                      | A/G          | 3.00                                                   | 2.35 | 1.18  | 1.46 | 2.00 | 2.05 | 2.35  | N/A   | N/A   | N/A |
|                      | CA (mg/dL)   | 10.1                                                   | 9.7  | 9.4   | 9.3  | 10.2 | 9.9  | 10.0  | N/A   | N/A   | N/A |
|                      | PHOS (mg/dL) | 6.2                                                    | 5.1  | 5.2   | 5.9  | 5.9  | 4.8  | 5.8   | N/A   | N/A   | N/A |
|                      | ALD (U/L)    | 78.5                                                   | 30.9 | 133.3 | 46.9 | 24.3 | 21.0 | 48.2  | N/A   | N/A   | N/A |
|                      | CKMM (U/L)   | 3615                                                   | 419  | 3050  | 98   | 348  | 116  | 1618  | N/A   | N/A   | N/A |
|                      | CKM% (%)     | 91.2                                                   | 81.6 | 93.4  | 65.6 | 77.2 | 64.1 | 84.9  | N/A   | N/A   | N/A |
|                      | CKMB (U/L)   | 174                                                    | 45   | 108   | 26   | 50   | 39   | 93    | N/A   | N/A   | N/A |
| CMB% (%)             | 4.4          | 8.8                                                    | 3.3  | 17.2  | 11.1 | 21.4 | 4.9  | N/A   | N/A   | N/A   |     |
| CKBB (U/L)           | 170          | 49                                                     | 108  | 26    | 53   | 26   | 194  | N/A   | N/A   | N/A   |     |
| CKB% (%)             | 4.3          | 9.6                                                    | 3.3  | 17.2  | 11.8 | 14.5 | 10.2 | N/A   | N/A   | N/A   |     |
| COMMENT              | N/A          | N/A                                                    | HEM  | N/A   | N/A  | N/A  | N/A  | N/A   | N/A   | N/A   |     |

|                                                         | Group (Necropsy Day)        | Group 4 (Necropsy Day 90±4)                            |       |       |       |       |       |      |       |       |       |
|---------------------------------------------------------|-----------------------------|--------------------------------------------------------|-------|-------|-------|-------|-------|------|-------|-------|-------|
|                                                         | Animal ID (Sex)             | 18-185 (Female)                                        |       |       |       |       |       |      |       |       |       |
|                                                         | Treatment (Dose)            | GTP-206 (4.5 x 10 <sup>13</sup> GC/Animal – High Dose) |       |       |       |       |       |      |       |       |       |
|                                                         | Study Day                   | BL                                                     | 0     | 7±1   | 14±2  | 28±3  | 60±3  | 90±4 | 120±4 | 150±4 | 180±5 |
| Complete Blood Counts (Hematology) & Plasma Coagulation | WBC (10 <sup>3</sup> /μL)   | 14.85                                                  | 17.18 | 21.40 | 15.67 | 12.04 | 11.90 | 9.77 | N/A   | N/A   | N/A   |
|                                                         | RBC (10 <sup>6</sup> /μL)   | 5.74                                                   | 5.21  | 5.07  | 4.52  | 5.50  | 5.77  | 5.50 | N/A   | N/A   | N/A   |
|                                                         | HB (g/dL)                   | 12.7                                                   | 11.5  | 11.1  | 10.1  | 12.0  | 12.6  | 11.8 | N/A   | N/A   | N/A   |
|                                                         | HCT (%)                     | 43.0                                                   | 39.9  | 37.5  | 34.2  | 41.7  | 43.2  | 40.4 | N/A   | N/A   | N/A   |
|                                                         | MCV (fL)                    | 74.9                                                   | 76.7  | 74.0  | 75.7  | 75.8  | 74.9  | 73.5 | N/A   | N/A   | N/A   |
|                                                         | MCH (pg)                    | 22.2                                                   | 22.0  | 21.9  | 22.5  | 21.9  | 21.9  | 21.5 | N/A   | N/A   | N/A   |
|                                                         | MCHC (g/dL)                 | 29.7                                                   | 28.7  | 29.6  | 29.7  | 28.9  | 29.2  | 29.2 | N/A   | N/A   | N/A   |
|                                                         | PLT (10 <sup>3</sup> /μL)   | 339                                                    | 299   | 231   | 329   | 283   | 310   | 318  | N/A   | N/A   | N/A   |
|                                                         | NEU% (%)                    | 16.9                                                   | 63.3  | 55.4  | 59.5  | 66.5  | 42.3  | 43.3 | N/A   | N/A   | N/A   |
|                                                         | NEU (10 <sup>3</sup> /μL)   | 2.51                                                   | 10.88 | 11.85 | 9.32  | 8.00  | 5.03  | 4.23 | N/A   | N/A   | N/A   |
|                                                         | LYMPH% (%)                  | 62.6                                                   | 31.4  | 36.2  | 36.0  | 28.3  | 53.7  | 51.9 | N/A   | N/A   | N/A   |
|                                                         | LYMPH (10 <sup>3</sup> /μL) | 9.30                                                   | 5.40  | 7.74  | 5.64  | 3.41  | 6.39  | 5.07 | N/A   | N/A   | N/A   |
|                                                         | MONO% (%)                   | 7.3                                                    | 2.4   | 4.6   | 1.2   | 1.5   | 1.0   | 1.1  | N/A   | N/A   | N/A   |
|                                                         | MONO (10 <sup>3</sup> /μL)  | 1.09                                                   | 0.41  | 0.99  | 0.19  | 0.18  | 0.12  | 0.10 | N/A   | N/A   | N/A   |
|                                                         | EOS% (%)                    | 4.4                                                    | 1.0   | 1.1   | 1.3   | 2.3   | 1.0   | 1.8  | N/A   | N/A   | N/A   |
|                                                         | EOS (10 <sup>3</sup> /μL)   | 0.65                                                   | 0.17  | 0.23  | 0.21  | 0.28  | 0.12  | 0.18 | N/A   | N/A   | N/A   |
|                                                         | BAS% (%)                    | 1.3                                                    | 0.7   | 1.5   | 0.7   | 0.5   | 0.7   | 0.6  | N/A   | N/A   | N/A   |
|                                                         | BAS (10 <sup>3</sup> /μL)   | 0.19                                                   | 0.11  | 0.32  | 0.11  | 0.06  | 0.08  | 0.06 | N/A   | N/A   | N/A   |
|                                                         | LUC% (%)                    | 7.5                                                    | 1.2   | 1.2   | 1.3   | 1.0   | 1.3   | 1.3  | N/A   | N/A   | N/A   |
|                                                         | LUC (10 <sup>3</sup> /μL)   | 1.11                                                   | 0.21  | 0.26  | 0.20  | 0.12  | 0.16  | 0.13 | N/A   | N/A   | N/A   |
|                                                         | MAC                         | +                                                      | +     | N/A   | +     | +     | +     | N/A  | N/A   | N/A   | N/A   |
|                                                         | LPLT                        | N/A                                                    | N/A   | +     | N/A   | N/A   | N/A   | N/A  | N/A   | N/A   | N/A   |
|                                                         | CPLT                        | N/A                                                    | N/A   | +     | N/A   | N/A   | N/A   | N/A  | N/A   | N/A   | N/A   |
| ANIS                                                    | N/A                         | N/A                                                    | N/A   | +     | N/A   | N/A   | N/A   | N/A  | N/A   | N/A   |       |
| ATYP                                                    | +                           | N/A                                                    | N/A   | N/A   | N/A   | N/A   | N/A   | N/A  | N/A   | N/A   |       |
| COMMENT                                                 | N/A                         | N/A                                                    | TRB   | N/A   | N/A   | N/A   | N/A   | N/A  | N/A   | N/A   |       |
| PT (sec)                                                | 10.7                        | 10.1                                                   | 9.8   | 10.0  | 10.7  | 10.9  | 10.6  | N/A  | N/A   | N/A   |       |
| APTT (sec)                                              | 25.6                        | 26.2                                                   | 30.6  | 22.9  | 26.7  | 25.8  | 23.5  | N/A  | N/A   | N/A   |       |
| FIB (mg/dL)                                             | 213                         | 201                                                    | 425   | 211   | 142   | 140   | 137   | N/A  | N/A   | N/A   |       |
| DIME (ng/mL)                                            | 346.9                       | 305.2                                                  | 7524. | 1929. | 347.5 | 298.8 | 464.3 | N/A  | N/A   | N/A   |       |
| FDP (FEU)                                               | <2.5                        | <2.5                                                   | 20.0  | 5.0   | <2.5  | <2.5  | <2.5  | N/A  | N/A   | N/A   |       |

| Group (Necropsy Day) |              | Group 4 (Necropsy Day 90±4)                            |      |       |      |      |      |       |       |       |     |
|----------------------|--------------|--------------------------------------------------------|------|-------|------|------|------|-------|-------|-------|-----|
| Animal ID (Sex)      |              | 18-185 (Female)                                        |      |       |      |      |      |       |       |       |     |
| Treatment (Dose)     |              | GTP-206 (4.5 x 10 <sup>13</sup> GC/Animal – High Dose) |      |       |      |      |      |       |       |       |     |
| Study Day            | BL           | 0                                                      | 7±1  | 14±2  | 28±3 | 60±3 | 90±4 | 120±4 | 150±4 | 180±5 |     |
| Serum Chemistry      | BUN (mg/dL)  | QNS                                                    | 17   | 17    | 23   | 25   | 26   | 18    | N/A   | N/A   | N/A |
|                      | CREA (mg/dL) | 0.4                                                    | 0.5  | 0.4   | 0.4  | 0.4  | 0.4  | 0.3   | N/A   | N/A   | N/A |
|                      | GLU (mg/dL)  | QNS                                                    | 83   | 94    | 89   | 74   | 73   | 116   | N/A   | N/A   | N/A |
|                      | NA (mmol/L)  | 148                                                    | 144  | 143   | 145  | 144  | 144  | 147   | N/A   | N/A   | N/A |
|                      | K (mmol/L)   | 3.8                                                    | 3.9  | 3.7   | 3.7  | 3.2  | 3.4  | 3.5   | N/A   | N/A   | N/A |
|                      | CL (mmol/L)  | 108                                                    | 106  | 99    | 106  | 105  | 105  | 109   | N/A   | N/A   | N/A |
|                      | ALP (U/L)    | 563                                                    | 607  | 337   | 425  | 654  | 698  | 776   | N/A   | N/A   | N/A |
|                      | ALT (U/L)    | 30                                                     | 30   | 106   | 76   | 34   | 37   | 25    | N/A   | N/A   | N/A |
|                      | AST (U/L)    | 35                                                     | 72   | 192   | 54   | 34   | 33   | 26    | N/A   | N/A   | N/A |
|                      | TBIL (mg/dL) | 0.2                                                    | 0.2  | 0.1   | 0.1  | 0.2  | 0.1  | 0.1   | N/A   | N/A   | N/A |
|                      | LDH (U/L)    | 303                                                    | 697  | 624   | 375  | 205  | 233  | 321   | N/A   | N/A   | N/A |
|                      | CPK (U/L)    | 594                                                    | 4822 | 1927  | 1230 | 152  | 140  | 214   | N/A   | N/A   | N/A |
|                      | GGT (U/L)    | 51                                                     | 50   | 31    | 41   | 49   | 59   | 58    | N/A   | N/A   | N/A |
|                      | TPRO (g/dL)  | 5.5                                                    | 6.1  | 5.8   | 6.4  | 5.9  | 5.8  | 5.8   | N/A   | N/A   | N/A |
|                      | ALB (g/dL)   | 3.8                                                    | 3.8  | 2.7   | 3.3  | 3.5  | 3.6  | 3.7   | N/A   | N/A   | N/A |
|                      | GLOB (g/dL)  | 1.7                                                    | 2.3  | 3.1   | 3.1  | 2.4  | 2.2  | 2.1   | N/A   | N/A   | N/A |
|                      | A/G          | 2.24                                                   | 1.65 | 0.87  | 1.06 | 1.46 | 1.64 | 1.76  | N/A   | N/A   | N/A |
|                      | CA (mg/dL)   | 9.2                                                    | 9.2  | 8.6   | 9.0  | 8.7  | 8.6  | 8.9   | N/A   | N/A   | N/A |
|                      | PHOS (mg/dL) | 7.1                                                    | 6.8  | 4.5   | 6.1  | 7.4  | 6.5  | 7.2   | N/A   | N/A   | N/A |
|                      | ALD (U/L)    | QNS                                                    | 83.0 | 165.4 | 51.8 | 20.1 | 21.5 | 22.4  | N/A   | N/A   | N/A |
|                      | CKMM (U/L)   | QNS                                                    | 4518 | 1821  | 1100 | 73   | 50   | 132   | N/A   | N/A   | N/A |
|                      | CKM% (%)     | QNS                                                    | 93.7 | 94.5  | 89.4 | 47.9 | 35.5 | 61.8  | N/A   | N/A   | N/A |
|                      | CKMB (U/L)   | QNS                                                    | 174  | 54    | 59   | 38   | 55   | 27    | N/A   | N/A   | N/A |
| CMB% (%)             | QNS          | 3.6                                                    | 2.8  | 4.8   | 25.3 | 39.4 | 12.8 | N/A   | N/A   | N/A   |     |
| CKBB (U/L)           | QNS          | 130                                                    | 52   | 73    | 41   | 35   | 54   | N/A   | N/A   | N/A   |     |
| CKB% (%)             | QNS          | 2.7                                                    | 2.7  | 5.9   | 26.8 | 25.1 | 25.4 | N/A   | N/A   | N/A   |     |
| COMMENT              | N/A          | N/A                                                    | N/A  | N/A   | N/A  | N/A  | N/A  | N/A   | N/A   | N/A   |     |

|                                                         | Group (Necropsy Day)        | Group 8 (Necropsy Day 180±5)                           |       |       |       |       |       |       |       |       |       |
|---------------------------------------------------------|-----------------------------|--------------------------------------------------------|-------|-------|-------|-------|-------|-------|-------|-------|-------|
|                                                         | Animal ID (Sex)             | 18-038 (Female)                                        |       |       |       |       |       |       |       |       |       |
|                                                         | Treatment (Dose)            | GTP-206 (4.5 x 10 <sup>13</sup> GC/Animal – High Dose) |       |       |       |       |       |       |       |       |       |
|                                                         | Study Day                   | BL                                                     | 0     | 7±1   | 14±2  | 28±3  | 60±3  | 90±4  | 120±4 | 150±4 | 180±5 |
| Complete Blood Counts (Hematology) & Plasma Coagulation | WBC (10 <sup>3</sup> /μL)   | 9.68                                                   | 7.48  | 7.76  | 9.39  | 9.29  | 10.70 | CLOT  | 10.14 | 9.88  | 9.39  |
|                                                         | RBC (10 <sup>6</sup> /μL)   | 5.51                                                   | 5.61  | 5.70  | 5.80  | 5.76  | 6.03  | CLOT  | 5.56  | 5.70  | 5.25  |
|                                                         | HB (g/dL)                   | 12.5                                                   | 12.5  | 12.6  | 12.7  | 12.8  | 13.2  | CLOT  | 11.9  | 12.6  | 11.3  |
|                                                         | HCT (%)                     | 39.6                                                   | 40.7  | 41.7  | 42.2  | 42.5  | 43.3  | CLOT  | 40.6  | 41.3  | 37.6  |
|                                                         | MCV (fL)                    | 71.8                                                   | 72.5  | 73.2  | 72.7  | 73.7  | 71.7  | CLOT  | 73.1  | 72.5  | 71.6  |
|                                                         | MCH (pg)                    | 22.7                                                   | 22.2  | 22.1  | 21.8  | 22.1  | 21.8  | CLOT  | 21.4  | 22.1  | 21.6  |
|                                                         | MCHC (g/dL)                 | 31.7                                                   | 30.7  | 30.2  | 30.0  | 30.0  | 30.4  | CLOT  | 29.2  | 30.4  | 30.1  |
|                                                         | PLT (10 <sup>3</sup> /μL)   | 377                                                    | 177   | 394   | 372   | 156   | 362   | CLOT  | 226   | 396   | 421   |
|                                                         | NEU% (%)                    | 64.3                                                   | 53.3  | 46.3  | 49.4  | 57.2  | 31.9  | CLOT  | 63.5  | 40.9  | 36.7  |
|                                                         | NEU (10 <sup>3</sup> /μL)   | 6.22                                                   | 3.99  | 3.60  | 4.64  | 5.32  | 3.42  | CLOT  | 6.44  | 4.04  | 3.45  |
|                                                         | LYMPH% (%)                  | 31.6                                                   | 40.1  | 45.5  | 42.0  | 37.3  | 60.8  | CLOT  | 32.9  | 53.0  | 57.2  |
|                                                         | LYMPH (10 <sup>3</sup> /μL) | 3.05                                                   | 3.00  | 3.53  | 3.94  | 3.47  | 6.51  | CLOT  | 3.33  | 5.24  | 5.37  |
|                                                         | MONO% (%)                   | 2.5                                                    | 1.7   | 3.2   | 2.0   | 2.1   | 2.4   | CLOT  | 1.2   | 1.4   | 1.9   |
|                                                         | MONO (10 <sup>3</sup> /μL)  | 0.24                                                   | 0.12  | 0.25  | 0.19  | 0.19  | 0.26  | CLOT  | 0.13  | 0.14  | 0.18  |
|                                                         | EOS% (%)                    | 0.9                                                    | 2.6   | 2.2   | 4.4   | 1.0   | 2.0   | CLOT  | 1.5   | 3.1   | 2.3   |
|                                                         | EOS (10 <sup>3</sup> /μL)   | 0.09                                                   | 0.19  | 0.17  | 0.41  | 0.09  | 0.22  | CLOT  | 0.15  | 0.31  | 0.22  |
|                                                         | BAS% (%)                    | 0.3                                                    | 1.0   | 0.5   | 0.5   | 0.8   | 1.1   | CLOT  | 0.3   | 0.4   | 0.7   |
|                                                         | BAS (10 <sup>3</sup> /μL)   | 0.03                                                   | 0.08  | 0.04  | 0.04  | 0.08  | 0.12  | CLOT  | 0.03  | 0.04  | 0.07  |
|                                                         | LUC% (%)                    | 0.5                                                    | 1.2   | 2.3   | 1.8   | 1.6   | 1.7   | CLOT  | 0.5   | 1.1   | 1.1   |
|                                                         | LUC (10 <sup>3</sup> /μL)   | 0.05                                                   | 0.09  | 0.18  | 0.17  | 0.15  | 0.18  | CLOT  | 0.06  | 0.11  | 0.10  |
|                                                         | MAC                         | N/A                                                    | N/A   | N/A   | N/A   | N/A   | N/A   | N/A   | N/A   | N/A   | N/A   |
|                                                         | LPLT                        | N/A                                                    | N/A   | N/A   | N/A   | N/A   | N/A   | N/A   | N/A   | N/A   | N/A   |
|                                                         | CPLT                        | N/A                                                    | N/A   | N/A   | N/A   | N/A   | N/A   | N/A   | N/A   | N/A   | N/A   |
|                                                         | ANIS                        | N/A                                                    | N/A   | N/A   | N/A   | N/A   | N/A   | N/A   | N/A   | N/A   | N/A   |
|                                                         | ATYP                        | N/A                                                    | N/A   | N/A   | N/A   | N/A   | N/A   | N/A   | N/A   | N/A   | N/A   |
|                                                         | COMMENT                     | HEM                                                    | N/A   | HEM   | N/A   | HEM   | HEM   | N/A   | N/A   | N/A   | N/A   |
| PT (sec)                                                | 10.6                        | 10.6                                                   | 9.9   | 9.9   | 10.6  | 10.7  | 10.9  | 10.5  | 10.4  | 10.1  |       |
| APTT (sec)                                              | 20.3                        | 22.0                                                   | 21.1  | 21.5  | 21.1  | 21.6  | 21.6  | 21.5  | 20.7  | 21.9  |       |
| FIB (mg/dL)                                             | 187                         | 179                                                    | 258   | 265   | 174   | 172   | 164   | 138   | 191   | 191   |       |
| DIME (ng/mL)                                            | 269.7                       | 374.2                                                  | 533.2 | 691.2 | 552.1 | 327.2 | 345.2 | 1250. | 368.5 | 450.9 |       |
| FDP (FEU)                                               | <2.5                        | <2.5                                                   | <2.5  | 2.5   | <2.5  | <2.5  | <2.5  | 10.0  | <2.5  | <2.5  |       |

| Group (Necropsy Day) |              | Group 8 (Necropsy Day 180±5)                           |      |      |      |      |      |       |       |       |      |
|----------------------|--------------|--------------------------------------------------------|------|------|------|------|------|-------|-------|-------|------|
| Animal ID (Sex)      |              | 18-038 (Female)                                        |      |      |      |      |      |       |       |       |      |
| Treatment (Dose)     |              | GTP-206 (4.5 x 10 <sup>13</sup> GC/Animal – High Dose) |      |      |      |      |      |       |       |       |      |
| Study Day            | BL           | 0                                                      | 7±1  | 14±2 | 28±3 | 60±3 | 90±4 | 120±4 | 150±4 | 180±5 |      |
| Serum Chemistry      | BUN (mg/dL)  | 27                                                     | 26   | 22   | 19   | 19   | 23   | 22    | 19    | 17    | 17   |
|                      | CREA (mg/dL) | 0.6                                                    | 0.4  | 0.3  | 0.4  | 0.3  | 0.4  | 0.3   | 0.4   | 0.4   | 0.3  |
|                      | GLU (mg/dL)  | 103                                                    | 71   | 84   | 107  | 131  | 71   | 95    | 90    | 86    | 71   |
|                      | NA (mmol/L)  | 155                                                    | 149  | 149  | 148  | 145  | 146  | 146   | 149   | 146   | 146  |
|                      | K (mmol/L)   | 3.2                                                    | 3.3  | 3.1  | 3.2  | 3.5  | 3.6  | 3.3   | 3.6   | 3.3   | 3.1  |
|                      | CL (mmol/L)  | 111                                                    | 109  | 111  | 110  | 109  | 106  | 107   | 109   | 107   | 107  |
|                      | ALP (U/L)    | 494                                                    | 492  | 382  | 489  | 486  | 517  | 444   | 527   | 608   | 534  |
|                      | ALT (U/L)    | 31                                                     | 29   | 34   | 38   | 42   | 39   | 34    | 31    | 27    | 19   |
|                      | AST (U/L)    | 29                                                     | 34   | 32   | 41   | 40   | 34   | 31    | 38    | 24    | 21   |
|                      | TBIL (mg/dL) | 0.1                                                    | 0.2  | 0.1  | 0.1  | 0.1  | 0.2  | 0.2   | 0.2   | 0.1   | 0.2  |
|                      | LDH (U/L)    | 286                                                    | 352  | 293  | 343  | 324  | 281  | 254   | 319   | 209   | 184  |
|                      | CPK (U/L)    | 175                                                    | 348  | 138  | 267  | 420  | 197  | 161   | 552   | 187   | 119  |
|                      | GGT (U/L)    | 68                                                     | 70   | 73   | 74   | 78   | 77   | 74    | 74    | 80    | 72   |
|                      | TPRO (g/dL)  | 6.4                                                    | 6.1  | 6.4  | 6.4  | 6.4  | 6.3  | 6.3   | 6.1   | 6.1   | 6.4  |
|                      | ALB (g/dL)   | 3.8                                                    | 3.7  | 3.8  | 3.8  | 3.8  | 3.6  | 3.9   | 3.6   | 3.8   | 3.7  |
|                      | GLOB (g/dL)  | 2.6                                                    | 2.4  | 2.6  | 2.6  | 2.6  | 2.7  | 2.4   | 2.5   | 2.3   | 2.7  |
|                      | A/G          | 1.46                                                   | 1.54 | 1.46 | 1.46 | 1.46 | 1.33 | 1.63  | 1.44  | 1.65  | 1.37 |
|                      | CA (mg/dL)   | 10.1                                                   | 9.6  | 9.3  | 9.6  | 9.6  | 9.8  | 9.7   | 9.6   | 10.0  | 9.7  |
|                      | PHOS (mg/dL) | 4.2                                                    | 5.2  | 4.6  | 4.8  | 5.1  | 4.4  | 4.5   | 6.7   | 5.0   | 5.7  |
|                      | ALD (U/L)    | 15.6                                                   | 19.6 | 13.2 | 18.4 | 20.8 | 16.8 | 13.0  | 18.8  | 11.2  | 10.7 |
| CKMM (U/L)           | QNS          | 261                                                    | 83   | 185  | 329  | 91   | 112  | 487   | 89    | 65    |      |
| CKM% (%)             | QNS          | 75.1                                                   | 60.0 | 69.2 | 78.3 | 46.2 | 69.8 | 88.2  | 47.7  | 54.7  |      |
| CKMB (U/L)           | QNS          | 36                                                     | 30   | 32   | 45   | 45   | 17   | 27    | 39    | 21    |      |
| CMB% (%)             | QNS          | 10.3                                                   | 21.8 | 11.9 | 10.7 | 22.7 | 10.7 | 4.9   | 20.8  | 18.0  |      |
| CKBB (U/L)           | QNS          | 51                                                     | 25   | 50   | 46   | 61   | 31   | 38    | 59    | 32    |      |
| CKB% (%)             | QNS          | 14.6                                                   | 18.1 | 18.9 | 11.0 | 31.1 | 19.5 | 6.9   | 31.5  | 27.3  |      |
| COMMENT              | N/A          | N/A                                                    | N/A  | N/A  | N/A  | N/A  | N/A  | HEM   | HEM   | N/A   | N/A  |

|                                                         | Group (Necropsy Day)        | Group 8 (Necropsy Day 180±5)                           |       |       |       |       |       |       |       |       |       |
|---------------------------------------------------------|-----------------------------|--------------------------------------------------------|-------|-------|-------|-------|-------|-------|-------|-------|-------|
|                                                         | Animal ID (Sex)             | 18-158 (Female)                                        |       |       |       |       |       |       |       |       |       |
|                                                         | Treatment (Dose)            | GTP-206 (4.5 x 10 <sup>13</sup> GC/Animal – High Dose) |       |       |       |       |       |       |       |       |       |
|                                                         | Study Day                   | BL                                                     | 0     | 7±1   | 14±2  | 28±3  | 60±3  | 90±4  | 120±4 | 150±4 | 180±5 |
| Complete Blood Counts (Hematology) & Plasma Coagulation | WBC (10 <sup>3</sup> /μL)   | 10.31                                                  | 11.95 | 9.95  | 10.80 | 8.71  | 9.19  | 6.51  | 8.48  | 9.23  | 11.40 |
|                                                         | RBC (10 <sup>6</sup> /μL)   | 5.90                                                   | 5.90  | 5.92  | 5.81  | 6.13  | 6.26  | 6.26  | 6.20  | 6.06  | 6.18  |
|                                                         | HB (g/dL)                   | 12.9                                                   | 12.4  | 12.6  | 12.3  | 12.9  | 13.1  | 13.2  | 13.0  | 12.9  | 13.0  |
|                                                         | HCT (%)                     | 42.4                                                   | 41.7  | 41.8  | 41.3  | 43.6  | 43.9  | 44.6  | 44.9  | 43.1  | 43.7  |
|                                                         | MCV (fL)                    | 71.8                                                   | 70.7  | 70.6  | 71.0  | 71.1  | 70.1  | 71.1  | 72.4  | 71.2  | 70.8  |
|                                                         | MCH (pg)                    | 21.8                                                   | 21.1  | 21.3  | 21.1  | 21.1  | 21.0  | 21.0  | 21.0  | 21.3  | 21.1  |
|                                                         | MCHC (g/dL)                 | 30.4                                                   | 29.8  | 30.1  | 29.7  | 29.7  | 29.9  | 29.6  | 29.0  | 30.0  | 29.8  |
|                                                         | PLT (10 <sup>3</sup> /μL)   | 365                                                    | 371   | 457   | 407   | 145   | 359   | 349   | 245   | 410   | 220   |
|                                                         | NEU% (%)                    | 61.0                                                   | 67.8  | 47.7  | 46.0  | 60.6  | 28.7  | 34.0  | 50.7  | 38.2  | 55.3  |
|                                                         | NEU (10 <sup>3</sup> /μL)   | 6.29                                                   | 8.10  | 4.75  | 4.97  | 5.28  | 2.64  | 2.21  | 4.30  | 3.52  | 6.31  |
|                                                         | LYMPH% (%)                  | 34.3                                                   | 27.1  | 46.2  | 46.6  | 33.9  | 63.9  | 59.7  | 43.5  | 55.9  | 39.7  |
|                                                         | LYMPH (10 <sup>3</sup> /μL) | 3.54                                                   | 3.24  | 4.59  | 5.04  | 2.95  | 5.87  | 3.88  | 3.69  | 5.16  | 4.52  |
|                                                         | MONO% (%)                   | 3.1                                                    | 2.7   | 3.2   | 2.3   | 2.8   | 4.2   | 3.4   | 2.7   | 2.7   | 2.2   |
|                                                         | MONO (10 <sup>3</sup> /μL)  | 0.32                                                   | 0.32  | 0.32  | 0.25  | 0.25  | 0.38  | 0.22  | 0.23  | 0.25  | 0.25  |
|                                                         | EOS% (%)                    | 0.6                                                    | 1.1   | 0.7   | 2.5   | 0.5   | 1.2   | 1.2   | 1.2   | 1.9   | 1.2   |
|                                                         | EOS (10 <sup>3</sup> /μL)   | 0.06                                                   | 0.13  | 0.07  | 0.27  | 0.04  | 0.11  | 0.08  | 0.10  | 0.17  | 0.14  |
|                                                         | BAS% (%)                    | 0.3                                                    | 0.7   | 0.5   | 0.9   | 0.8   | 0.7   | 0.6   | 1.0   | 0.4   | 1.0   |
|                                                         | BAS (10 <sup>3</sup> /μL)   | 0.03                                                   | 0.08  | 0.05  | 0.10  | 0.07  | 0.06  | 0.04  | 0.08  | 0.04  | 0.11  |
|                                                         | LUC% (%)                    | 0.7                                                    | 0.6   | 1.6   | 1.7   | 1.5   | 1.4   | 1.2   | 0.8   | 0.9   | 0.6   |
|                                                         | LUC (10 <sup>3</sup> /μL)   | 0.07                                                   | 0.07  | 0.16  | 0.18  | 0.13  | 0.13  | 0.08  | 0.07  | 0.08  | 0.07  |
|                                                         | MAC                         | N/A                                                    | N/A   | N/A   | N/A   | N/A   | N/A   | N/A   | N/A   | N/A   | N/A   |
|                                                         | LPLT                        | N/A                                                    | N/A   | N/A   | N/A   | N/A   | N/A   | N/A   | N/A   | N/A   | N/A   |
|                                                         | CPLT                        | N/A                                                    | +     | N/A   | N/A   | +     | +     | N/A   | N/A   | N/A   | N/A   |
|                                                         | ANIS                        | N/A                                                    | N/A   | N/A   | N/A   | N/A   | N/A   | N/A   | N/A   | N/A   | N/A   |
|                                                         | ATYP                        | N/A                                                    | N/A   | N/A   | N/A   | N/A   | N/A   | N/A   | N/A   | N/A   | N/A   |
|                                                         | COMMENT                     | N/A                                                    | N/A   | N/A   | N/A   | HEM   | HEM   | HEM   | HEM   | N/A   | N/A   |
| PT (sec)                                                | 11.1                        | 10.7                                                   | 10.4  | 10.0  | 10.9  | 11.4  | 11.4  | 10.5  | 10.7  | 10.4  |       |
| APTT (sec)                                              | 21.5                        | 21.9                                                   | 20.7  | 20.3  | 21.1  | 21.9  | 21.7  | 20.6  | 20.9  | 20.5  |       |
| FIB (mg/dL)                                             | 141                         | 142                                                    | 189   | 208   | 150   | 129   | 131   | 141   | 157   | 147   |       |
| DIME (ng/mL)                                            | 482.6                       | 395.5                                                  | 334.5 | 631.8 | 401.6 | 439.7 | 251.1 | 416.4 | 347.1 | 403.1 |       |
| FDP (FEU)                                               | 2.5                         | <2.5                                                   | <2.5  | 2.5   | <2.5  | <2.5  | <2.5  | <2.5  | <2.5  | <2.5  |       |

| Group (Necropsy Day) |              | Group 8 (Necropsy Day 180±5)                           |      |      |      |      |      |       |       |       |      |
|----------------------|--------------|--------------------------------------------------------|------|------|------|------|------|-------|-------|-------|------|
| Animal ID (Sex)      |              | 18-158 (Female)                                        |      |      |      |      |      |       |       |       |      |
| Treatment (Dose)     |              | GTP-206 (4.5 x 10 <sup>13</sup> GC/Animal – High Dose) |      |      |      |      |      |       |       |       |      |
| Study Day            | BL           | 0                                                      | 7±1  | 14±2 | 28±3 | 60±3 | 90±4 | 120±4 | 150±4 | 180±5 |      |
| Serum Chemistry      | BUN (mg/dL)  | QNS                                                    | 21   | 22   | 20   | 19   | 22   | 18    | 18    | 13    | 13   |
|                      | CREA (mg/dL) | 0.6                                                    | 0.4  | 0.4  | 0.5  | 0.4  | 0.4  | 0.4   | 0.5   | 0.4   | 0.4  |
|                      | GLU (mg/dL)  | QNS                                                    | 73   | 79   | 75   | 122  | 61   | 102   | 94    | 99    | 122  |
|                      | NA (mmol/L)  | 157                                                    | 147  | 148  | 147  | 147  | 146  | 146   | 146   | 146   | 148  |
|                      | K (mmol/L)   | 3.3                                                    | 3.2  | 3.1  | 3.2  | 3.2  | 3.2  | 3.2   | 3.1   | 3.2   | 3.3  |
|                      | CL (mmol/L)  | 113                                                    | 108  | 108  | 106  | 109  | 105  | 108   | 107   | 107   | 111  |
|                      | ALP (U/L)    | 693                                                    | 587  | 526  | 702  | 677  | 689  | 599   | 714   | 808   | 873  |
|                      | ALT (U/L)    | 35                                                     | 27   | 27   | 31   | 31   | 34   | 29    | 31    | 36    | 35   |
|                      | AST (U/L)    | 43                                                     | 36   | 34   | 44   | 42   | 47   | 35    | 38    | 36    | 86   |
|                      | TBIL (mg/dL) | 0.2                                                    | 0.2  | 0.2  | 0.2  | 0.2  | 0.2  | 0.2   | 0.2   | 0.2   | 0.2  |
|                      | LDH (U/L)    | QNS                                                    | 265  | 254  | 383  | 299  | 342  | 204   | 272   | 252   | 605  |
|                      | CPK (U/L)    | 222                                                    | 255  | 188  | 211  | 171  | 345  | 407   | 193   | 247   | 6087 |
|                      | GGT (U/L)    | QNS                                                    | 74   | 79   | 79   | 81   | 85   | 80    | 83    | 94    | 100  |
|                      | TPRO (g/dL)  | QNS                                                    | 6.1  | 6.5  | 6.4  | 6.1  | 6.1  | 6.1   | 5.9   | 6.0   | 6.5  |
|                      | ALB (g/dL)   | 4.4                                                    | 4.2  | 4.3  | 4.1  | 4.1  | 4.0  | 4.3   | 4.1   | 4.3   | 4.3  |
|                      | GLOB (g/dL)  | QNS                                                    | 1.9  | 2.2  | 2.3  | 2.0  | 2.1  | 1.8   | 1.8   | 1.7   | 2.2  |
|                      | A/G          | QNS                                                    | 2.21 | 1.95 | 1.78 | 2.05 | 1.90 | 2.39  | 2.28  | 2.53  | 1.95 |
|                      | CA (mg/dL)   | 10.4                                                   | 9.7  | 9.9  | 9.9  | 9.3  | 9.7  | 9.7   | 9.4   | 10.0  | 10.0 |
|                      | PHOS (mg/dL) | QNS                                                    | 4.9  | 3.8  | 4.6  | 5.1  | 5.0  | 4.3   | 5.4   | 4.6   | 5.4  |
|                      | ALD (U/L)    | QNS                                                    | 18.3 | 15.1 | 23.0 | 22.8 | 24.4 | 15.7  | 19.1  | 17.0  | 84.5 |
|                      | CKMM (U/L)   | QNS                                                    | 183  | 126  | 153  | 100  | 238  | 350   | 147   | 179   | 5661 |
|                      | CKM% (%)     | QNS                                                    | 71.8 | 66.8 | 72.4 | 58.4 | 68.9 | 86.1  | 76.0  | 72.5  | 93.0 |
|                      | CKMB (U/L)   | QNS                                                    | 34   | 36   | 33   | 40   | 52   | 26    | 21    | 37    | 243  |
| CMB% (%)             | QNS          | 13.4                                                   | 19.2 | 15.6 | 23.2 | 15.0 | 6.5  | 10.8  | 15.0  | 4.0   |      |
| CKBB (U/L)           | QNS          | 38                                                     | 26   | 25   | 31   | 56   | 30   | 25    | 31    | 183   |      |
| CKB% (%)             | QNS          | 14.8                                                   | 14.0 | 12.0 | 18.3 | 16.1 | 7.4  | 13.1  | 12.5  | 3.0   |      |
| COMMENT              | N/A          | N/A                                                    | N/A  | N/A  | HEM  | HEM  | N/A  | N/A   | N/A   | N/A   |      |

|                                                         | Group (Necropsy Day)        | Group 8 (Necropsy Day 180±5)                           |       |       |       |       |       |       |       |       |       |
|---------------------------------------------------------|-----------------------------|--------------------------------------------------------|-------|-------|-------|-------|-------|-------|-------|-------|-------|
|                                                         | Animal ID (Sex)             | 18-170 (Male)                                          |       |       |       |       |       |       |       |       |       |
|                                                         | Treatment (Dose)            | GTP-206 (4.5 x 10 <sup>13</sup> GC/Animal – High Dose) |       |       |       |       |       |       |       |       |       |
|                                                         | Study Day                   | BL                                                     | 0     | 7±1   | 14±2  | 28±3  | 60±3  | 90±4  | 120±4 | 150±4 | 180±5 |
| Complete Blood Counts (Hematology) & Plasma Coagulation | WBC (10 <sup>3</sup> /μL)   | 17.44                                                  | 6.86  | 7.99  | 12.56 | 19.33 | 24.34 | 8.77  | 10.33 | 9.63  | 7.42  |
|                                                         | RBC (10 <sup>6</sup> /μL)   | 5.73                                                   | 5.35  | 5.64  | 5.28  | 5.57  | 5.79  | 5.76  | 5.46  | 5.55  | 5.63  |
|                                                         | HB (g/dL)                   | 13.5                                                   | 13.1  | 13.1  | 12.4  | 13.2  | 13.6  | 13.6  | 12.7  | 13.0  | 13.3  |
|                                                         | HCT (%)                     | 44.6                                                   | 41.1  | 43.9  | 41.0  | 43.4  | 44.1  | 44.1  | 42.1  | 42.9  | 43.9  |
|                                                         | MCV (fL)                    | 77.9                                                   | 76.8  | 77.8  | 77.6  | 78.0  | 76.2  | 76.6  | 77.1  | 77.2  | 78.0  |
|                                                         | MCH (pg)                    | 23.5                                                   | 24.5  | 23.2  | 23.4  | 23.8  | 23.6  | 23.6  | 23.3  | 23.4  | 23.7  |
|                                                         | MCHC (g/dL)                 | 30.2                                                   | 32.0  | 29.9  | 30.1  | 30.5  | 30.9  | 30.8  | 30.2  | 30.4  | 30.3  |
|                                                         | PLT (10 <sup>3</sup> /μL)   | 312                                                    | 352   | 305   | 307   | 488   | 383   | 376   | 467   | 414   | 475   |
|                                                         | NEU% (%)                    | 79.4                                                   | 50.1  | 57.0  | 71.3  | 81.7  | 84.7  | 62.5  | 25.0  | 66.4  | 43.0  |
|                                                         | NEU (10 <sup>3</sup> /μL)   | 13.85                                                  | 3.44  | 4.55  | 8.95  | 15.79 | 20.62 | 5.48  | 2.58  | 6.40  | 3.19  |
|                                                         | LYMPH% (%)                  | 16.9                                                   | 41.7  | 36.5  | 23.8  | 14.3  | 11.2  | 32.1  | 65.0  | 27.3  | 48.5  |
|                                                         | LYMPH (10 <sup>3</sup> /μL) | 2.95                                                   | 2.86  | 2.92  | 2.99  | 2.76  | 2.72  | 2.82  | 6.72  | 2.63  | 3.59  |
|                                                         | MONO% (%)                   | 1.8                                                    | 4.9   | 3.6   | 2.5   | 2.4   | 2.3   | 2.5   | 2.4   | 2.7   | 2.8   |
|                                                         | MONO (10 <sup>3</sup> /μL)  | 0.32                                                   | 0.34  | 0.29  | 0.32  | 0.46  | 0.56  | 0.22  | 0.25  | 0.26  | 0.21  |
|                                                         | EOS% (%)                    | 1.0                                                    | 1.2   | 1.3   | 1.1   | 0.7   | 0.5   | 1.4   | 5.5   | 2.5   | 3.8   |
|                                                         | EOS (10 <sup>3</sup> /μL)   | 0.17                                                   | 0.08  | 0.10  | 0.14  | 0.13  | 0.12  | 0.12  | 0.57  | 0.24  | 0.28  |
|                                                         | BAS% (%)                    | 0.4                                                    | 0.9   | 0.7   | 0.5   | 0.5   | 0.9   | 0.5   | 0.6   | 0.3   | 0.4   |
|                                                         | BAS (10 <sup>3</sup> /μL)   | 0.07                                                   | 0.06  | 0.06  | 0.06  | 0.10  | 0.21  | 0.05  | 0.07  | 0.03  | 0.03  |
|                                                         | LUC% (%)                    | 0.4                                                    | 1.1   | 0.9   | 0.8   | 0.5   | 0.4   | 1.0   | 1.5   | 0.8   | 1.5   |
|                                                         | LUC (10 <sup>3</sup> /μL)   | 0.07                                                   | 0.08  | 0.07  | 0.10  | 0.09  | 0.11  | 0.09  | 0.15  | 0.08  | 0.11  |
|                                                         | MAC                         | +                                                      | +     | +     | +     | +     | N/A   | +     | +     | +     | +     |
|                                                         | LPLT                        | N/A                                                    | N/A   | +     | N/A   | N/A   | N/A   | N/A   | N/A   | N/A   | N/A   |
|                                                         | CPLT                        | +                                                      | +     | +     | +     | +     | N/A   | +     | N/A   | +     | N/A   |
|                                                         | ANIS                        | N/A                                                    | N/A   | N/A   | N/A   | N/A   | N/A   | N/A   | N/A   | N/A   | N/A   |
|                                                         | ATYP                        | N/A                                                    | N/A   | N/A   | N/A   | N/A   | N/A   | N/A   | N/A   | N/A   | N/A   |
|                                                         | COMMENT                     | N/A                                                    | N/A   | N/A   | N/A   | N/A   | HEM   | N/A   | N/A   | HEM   | N/A   |
| PT (sec)                                                | 10.6                        | 11.2                                                   | 10.7  | 10.4  | 10.8  | 12.0  | 12.1  | 11.4  | 11.6  | 11.1  |       |
| APTT (sec)                                              | 22.4                        | 22.9                                                   | 23.4  | 23.9  | 23.1  | 24.7  | 25.1  | 24.1  | 23.6  | 24.4  |       |
| FIB (mg/dL)                                             | 179                         | 167                                                    | 195   | 201   | 191   | 107   | 155   | 183   | 176   | 166   |       |
| DIME (ng/mL)                                            | 351.0                       | 242.0                                                  | 232.9 | 351.0 | 372.1 | 6881. | 364.6 | 347.9 | 419.1 | 209.9 |       |
| FDP (FEU)                                               | <2.5                        | <2.5                                                   | <2.5  | 2.5   | 2.5   | 20.0  | <2.5  | <2.5  | <2.5  | <2.5  |       |



| Group (Necropsy Day) |              | Group 8 (Necropsy Day 180±5)                           |      |      |      |      |      |       |       |       |      |
|----------------------|--------------|--------------------------------------------------------|------|------|------|------|------|-------|-------|-------|------|
| Animal ID (Sex)      |              | 18-170 (Male)                                          |      |      |      |      |      |       |       |       |      |
| Treatment (Dose)     |              | GTP-206 (4.5 x 10 <sup>13</sup> GC/Animal – High Dose) |      |      |      |      |      |       |       |       |      |
| Study Day            | BL           | 0                                                      | 7±1  | 14±2 | 28±3 | 60±3 | 90±4 | 120±4 | 150±4 | 180±5 |      |
| Serum Chemistry      | BUN (mg/dL)  | 19                                                     | 18   | 22   | 15   | 24   | 24   | 18    | 14    | 19    | 17   |
|                      | CREA (mg/dL) | 0.6                                                    | 0.6  | 0.6  | 0.6  | 0.5  | 0.4  | 0.4   | 0.4   | 0.5   | 0.4  |
|                      | GLU (mg/dL)  | 70                                                     | 69   | 65   | 73   | 48   | 46   | 68    | 76    | 75    | 71   |
|                      | NA (mmol/L)  | 150                                                    | 150  | 151  | 149  | 148  | 143  | 150   | 150   | 147   | 146  |
|                      | K (mmol/L)   | 3.1                                                    | 3.3  | 3.3  | 3.0  | 3.4  | 3.4  | 3.4   | 3.7   | 4.0   | 3.6  |
|                      | CL (mmol/L)  | 109                                                    | 109  | 111  | 110  | 109  | 107  | 111   | 112   | 109   | 109  |
|                      | ALP (U/L)    | 883                                                    | 881  | 679  | 771  | 790  | 1044 | 1076  | 901   | 905   | 743  |
|                      | ALT (U/L)    | 27                                                     | 25   | 20   | 26   | 33   | 33   | 26    | 26    | 36    | 28   |
|                      | AST (U/L)    | 48                                                     | 31   | 33   | 38   | 40   | 40   | 30    | 32    | 44    | 32   |
|                      | TBIL (mg/dL) | 0.2                                                    | 0.2  | 0.2  | 0.2  | 0.2  | 0.3  | 0.2   | 0.2   | 0.2   | 0.2  |
|                      | LDH (U/L)    | 384                                                    | 205  | 202  | 252  | 269  | 239  | 221   | 247   | 381   | 243  |
|                      | CPK (U/L)    | 1097                                                   | 125  | 126  | 181  | 418  | 386  | 218   | 265   | 980   | 266  |
|                      | GGT (U/L)    | 76                                                     | 69   | 67   | 68   | 84   | 87   | 88    | 90    | 93    | 81   |
|                      | TPRO (g/dL)  | 6.5                                                    | 6.2  | 6.5  | 6.1  | 6.5  | 6.3  | 6.2   | 5.9   | 6.3   | 6.4  |
|                      | ALB (g/dL)   | 4.0                                                    | 4.0  | 4.1  | 3.9  | 4.1  | 4.1  | 3.9   | 3.8   | 3.9   | 3.9  |
|                      | GLOB (g/dL)  | 2.5                                                    | 2.2  | 2.4  | 2.2  | 2.4  | 2.2  | 2.3   | 2.1   | 2.4   | 2.5  |
|                      | A/G          | 1.60                                                   | 1.82 | 1.71 | 1.77 | 1.71 | 1.86 | 1.70  | 1.81  | 1.63  | 1.56 |
|                      | CA (mg/dL)   | 9.6                                                    | 9.5  | 9.8  | 9.4  | 9.5  | 9.3  | 9.3   | 9.6   | 9.7   | 9.7  |
|                      | PHOS (mg/dL) | 4.6                                                    | 4.9  | 5.6  | 5.0  | 5.6  | 6.2  | 5.0   | 5.2   | 6.3   | 6.7  |
|                      | ALD (U/L)    | 34.7                                                   | 18.7 | 14.0 | 23.8 | 22.2 | 18.2 | 17.1  | 19.6  | 31.5  | 20.9 |
|                      | CKMM (U/L)   | 963                                                    | 58   | 95   | 114  | 298  | 268  | 128   | 164   | 859   | 164  |
|                      | CKM% (%)     | 87.8                                                   | 46.2 | 75.1 | 62.9 | 71.3 | 69.5 | 58.7  | 61.7  | 87.7  | 61.8 |
| CKMB (U/L)           | 77           | 33                                                     | 18   | 28   | 52   | 42   | 36   | 41    | 47    | 31    |      |
| CMB% (%)             | 7.0          | 26.0                                                   | 14.4 | 15.4 | 12.4 | 10.8 | 16.6 | 15.4  | 4.8   | 11.7  |      |
| CKBB (U/L)           | 57           | 35                                                     | 13   | 39   | 68   | 76   | 54   | 60    | 73    | 70    |      |
| CKB% (%)             | 5.2          | 27.7                                                   | 10.4 | 21.7 | 16.2 | 19.7 | 24.7 | 22.8  | 7.4   | 26.5  |      |
| COMMENT              | N/A          | N/A                                                    | N/A  | N/A  | N/A  | N/A  | N/A  | N/A   | HEM   | N/A   |      |

## CEREBROSPINAL FLUID

| Treatment   | Dose (GC/Animal)                  | Group | Necropsy Day | Animal ID  | Sex       | Study Day   | WBC Count (per $\mu$ L) | RBC Count (per $\mu$ L) | Total Protein (mg/dL) | Glucose (mg/dL) | Color     | Clarity         |       |
|-------------|-----------------------------------|-------|--------------|------------|-----------|-------------|-------------------------|-------------------------|-----------------------|-----------------|-----------|-----------------|-------|
| ITFFB       | N/A                               | 1     | 90 $\pm$ 4   | 18-162     | F         | 0           | 0                       | 0                       | 6                     | 65              | colorless | clear           |       |
|             |                                   |       |              |            |           | 7 $\pm$ 1   | 1                       | 1300                    | 8                     | 40              | colorless | slightly cloudy |       |
|             |                                   |       |              |            |           | 14 $\pm$ 2  | 0                       | 0                       | 7                     | 58              | colorless | clear           |       |
|             |                                   |       |              |            |           | 28 $\pm$ 3  | 0                       | 80                      | 5                     | 41              | colorless | clear           |       |
|             |                                   |       |              |            |           | 60 $\pm$ 3  | 1                       | 3                       | 6                     | 34              | colorless | clear           |       |
|             |                                   |       |              |            |           | 90 $\pm$ 4  | 1                       | 450                     | 11                    | 59              | colorless | clear           |       |
|             |                                   | 5     | 180 $\pm$ 5  | 18-159     | M         | 0           | 1                       | 0                       | 9                     | 59              | colorless | clear           |       |
|             |                                   |       |              |            |           | 7 $\pm$ 1   | 0                       | 10                      | 10                    | 53              | colorless | clear           |       |
|             |                                   |       |              |            |           | 14 $\pm$ 2  | 2                       | 1                       | 10                    | 43              | colorless | clear           |       |
|             |                                   |       |              |            |           | 28 $\pm$ 3  | 0                       | 600                     | 12                    | 59              | colorless | clear           |       |
|             |                                   |       |              |            |           | 60 $\pm$ 3  | 1                       | 10                      | 12                    | 39              | colorless | clear           |       |
|             |                                   |       |              |            |           | 90 $\pm$ 4  | 4                       | 1250                    | 19                    | 44              | colorless | slightly cloudy |       |
|             |                                   |       |              |            |           | 120 $\pm$ 4 | 1                       | 0                       | 13                    | 46              | colorless | clear           |       |
|             |                                   |       |              |            |           | 150 $\pm$ 4 | 2                       | 3200                    | 19                    | 59              | colorless | slightly cloudy |       |
| 180 $\pm$ 5 | 1                                 | 10    | 13           | 53         | colorless | clear       |                         |                         |                       |                 |           |                 |       |
| GTP-206     | 4.5 x 10 <sup>12</sup> (Low Dose) | 2     | 90 $\pm$ 4   | 18-091     | M         | 0           | 1                       | 10                      | 8                     | 57              | colorless | clear           |       |
|             |                                   |       |              |            |           | 7 $\pm$ 1   | 1                       | 1                       | 11                    | 59              | colorless | clear           |       |
|             |                                   |       |              |            |           | 14 $\pm$ 2  | 0                       | 10                      | 11                    | 53              | colorless | clear           |       |
|             |                                   |       |              |            |           | 28 $\pm$ 3  | 1                       | 0                       | 9                     | 52              | colorless | clear           |       |
|             |                                   |       |              |            |           | 60 $\pm$ 3  | 1                       | 20                      | 8                     | 54              | colorless | clear           |       |
|             |                                   |       |              |            |           | 90 $\pm$ 4  | 1                       | 1                       | 10                    | 49              | colorless | clear           |       |
|             |                                   |       |              |            | 18-168    | F           | 0                       | 2                       | 0                     | 11              | 49        | colorless       | clear |
|             |                                   |       |              |            |           |             | 7 $\pm$ 1               | 0                       | 1                     | 12              | 39        | colorless       | clear |
|             |                                   |       |              |            |           |             | 14 $\pm$ 2 <sup>a</sup> | 8                       | 10                    | 12              | 40        | colorless       | clear |
|             |                                   |       |              |            |           |             | 28 $\pm$ 3 <sup>b</sup> | 1                       | 0                     | 15              | 39        | colorless       | clear |
|             |                                   |       |              | 60 $\pm$ 3 | 1         |             | 1                       | 14                      | 37                    | colorless       | clear     |                 |       |
|             |                                   |       |              | 90 $\pm$ 4 | 4         |             | 50                      | 14                      | 50                    | colorless       | clear     |                 |       |

| Treatment | Dose (GC/Animal)                     | Group | Necropsy Day | Animal ID | Sex       | Study Day | WBC Count (per $\mu$ L) | RBC Count (per $\mu$ L) | Total Protein (mg/dL) | Glucose (mg/dL) | Color     | Clarity |
|-----------|--------------------------------------|-------|--------------|-----------|-----------|-----------|-------------------------|-------------------------|-----------------------|-----------------|-----------|---------|
| GTP-206   | 4.5 x 10 <sup>12</sup><br>(Low Dose) | 2     | 90±4         | 18-173    | F         | 0         | 1                       | 0                       | 7                     | 64              | colorless | clear   |
|           |                                      |       |              |           |           | 7±1       | 0                       | 0                       | 8                     | 58              | colorless | clear   |
|           |                                      |       |              |           |           | 14±2      | 1                       | 10                      | 7                     | 54              | colorless | clear   |
|           |                                      |       |              |           |           | 28±3      | 0                       | 0                       | 8                     | 60              | colorless | clear   |
|           |                                      |       |              |           |           | 60±3      | 1                       | 10                      | 7                     | 57              | colorless | clear   |
|           |                                      |       |              |           |           | 90±4      | 1                       | 150                     | 9                     | 55              | colorless | clear   |
|           |                                      | 6     | 180±5        | 18-042    | F         | 0         | 0                       | 0                       | 9                     | 60              | colorless | clear   |
|           |                                      |       |              |           |           | 7±1       | 2                       | 0                       | 10                    | 44              | colorless | clear   |
|           |                                      |       |              |           |           | 14±2      | 0                       | 20                      | 9                     | 45              | colorless | clear   |
|           |                                      |       |              |           |           | 28±3      | 3                       | 30                      | 12                    | 52              | colorless | clear   |
|           |                                      |       |              |           |           | 60±3      | 1                       | 20                      | 11                    | 51              | colorless | clear   |
|           |                                      |       |              |           |           | 90±4      | 0                       | 10                      | 10                    | 45              | colorless | clear   |
|           |                                      |       |              |           |           | 120±4     | 2                       | 1                       | 11                    | 50              | colorless | clear   |
|           |                                      |       |              |           |           | 150±4     | 0                       | 0                       | 11                    | 47              | colorless | clear   |
|           |                                      |       | 180±5        | 0         | 0         | 9         | 54                      | colorless               | clear                 |                 |           |         |
|           |                                      |       | 180±5        | 18-121    | F         | 0         | 1                       | 10                      | 8                     | 58              | colorless | clear   |
|           |                                      |       |              |           |           | 7±1       | 8                       | 7500                    | 62                    | 60              | colorless | cloudy  |
|           |                                      |       |              |           |           | 14±2      | 0                       | 0                       | 7                     | 51              | colorless | clear   |
|           |                                      |       |              |           |           | 28±3      | 1                       | 450                     | 10                    | 59              | colorless | clear   |
|           |                                      |       |              |           |           | 60±3      | 2                       | 1                       | 11                    | 59              | colorless | clear   |
|           |                                      |       |              |           |           | 90±4      | 0                       | 0                       | 11                    | 54              | colorless | clear   |
| 120±4     | 1                                    | 0     |              |           |           | 15        | 54                      | colorless               | clear                 |                 |           |         |
| 150±4     | 1                                    | 3     | 13           | 56        | colorless | clear     |                         |                         |                       |                 |           |         |
| 180±5     | 3                                    | 350   | 12           | 53        | colorless | clear     |                         |                         |                       |                 |           |         |

| Treatment | Dose (GC/Animal)                     | Group | Necropsy Day | Animal ID | Sex | Study Day | WBC Count (per $\mu$ L) | RBC Count (per $\mu$ L) | Total Protein (mg/dL) | Glucose (mg/dL) | Color     | Clarity |           |       |
|-----------|--------------------------------------|-------|--------------|-----------|-----|-----------|-------------------------|-------------------------|-----------------------|-----------------|-----------|---------|-----------|-------|
| GTP-206   | 4.5 x 10 <sup>12</sup><br>(Low Dose) | 6     | 180±5        | 18-171    | M   | 0         | 0                       | 0                       | 4                     | 67              | colorless | clear   |           |       |
|           |                                      |       |              |           |     | 7±1       | 0                       | 0                       | 6                     | 44              | colorless | clear   |           |       |
|           |                                      |       |              |           |     | 14±2      | 0                       | 0                       | 5                     | 63              | colorless | clear   |           |       |
|           |                                      |       |              |           |     | 28±3      | 0                       | 0                       | 5                     | 47              | colorless | clear   |           |       |
|           |                                      |       |              |           |     | 60±3      | 0                       | 1                       | 5                     | 44              | colorless | clear   |           |       |
|           |                                      |       |              |           |     | 90±4      | 0                       | 0                       | 6                     | 53              | colorless | clear   |           |       |
|           |                                      |       |              |           |     | 120±4     | 0                       | 0                       | 6                     | 55              | colorless | clear   |           |       |
|           |                                      |       |              |           |     | 150±4     | 0                       | 1                       | 7                     | 42              | colorless | clear   |           |       |
|           | 180±5                                | 0     | 10           | 5         | 44  | colorless | clear                   |                         |                       |                 |           |         |           |       |
|           | 1.5 x 10 <sup>13</sup><br>(Mid-Dose) | 3     | 90±4         | 18-167    | M   | 0         | 0                       | 40                      | 8                     | 57              | colorless | clear   |           |       |
|           |                                      |       |              |           |     | 7±1       | 0                       | 0                       | 8                     | 49              | colorless | clear   |           |       |
|           |                                      |       |              |           |     | 14±2      | 0                       | 1                       | 9                     | 49              | colorless | clear   |           |       |
|           |                                      |       |              |           |     | 28±3      | 1                       | 0                       | 8                     | 41              | colorless | clear   |           |       |
|           |                                      |       |              |           |     | 60±3      | 1                       | 1                       | 10                    | 47              | colorless | clear   |           |       |
|           |                                      |       |              |           |     | 90±4      | 0                       | 0                       | 8                     | 55              | colorless | clear   |           |       |
|           |                                      |       |              |           |     | 18-176    | M                       | 0                       | 0                     | 0               | 7         | 56      | colorless | clear |
|           |                                      |       |              |           |     |           |                         | 7±1                     | 0                     | 0               | 7         | 57      | colorless | clear |
|           |                                      |       |              | 14±2      | 0   |           |                         | 10                      | 7                     | 58              | colorless | clear   |           |       |
|           |                                      |       |              | 28±3      | 1   |           |                         | 0                       | 9                     | 40              | colorless | clear   |           |       |
|           |                                      |       |              | 60±3      | 0   |           |                         | 0                       | 8                     | 46              | colorless | clear   |           |       |
|           |                                      |       |              | 90±4      | 26  |           |                         | 2500                    | 16                    | 51              | colorless | clear   |           |       |
|           |                                      |       |              | 18-187    | F   |           |                         | 0                       | 0                     | 1               | 5         | 65      | colorless | clear |
|           |                                      |       |              |           |     |           |                         | 7±1                     | 0                     | 20              | 5         | 79      | colorless | clear |
|           |                                      |       |              |           |     | 14±2      | 0                       | 1190                    | 10                    | 75              | colorless | clear   |           |       |
| 28±3      |                                      |       |              |           |     | 1         | 1080                    | 13                      | 69                    | colorless       | clear     |         |           |       |
| 60±3      | 1                                    | 10    | 8            |           |     | 57        | colorless               | clear                   |                       |                 |           |         |           |       |
| 90±4      | 0                                    | 0     | 7            |           |     | 55        | colorless               | clear                   |                       |                 |           |         |           |       |

| Treatment | Dose (GC/Animal)                     | Group | Necropsy Day | Animal ID | Sex       | Study Day | WBC Count (per $\mu$ L) | RBC Count (per $\mu$ L) | Total Protein (mg/dL) | Glucose (mg/dL) | Color     | Clarity |
|-----------|--------------------------------------|-------|--------------|-----------|-----------|-----------|-------------------------|-------------------------|-----------------------|-----------------|-----------|---------|
| GTP-206   | 1.5 x 10 <sup>13</sup><br>(Mid-Dose) | 7     | 180±5        | 18-055    | M         | 0         | 0                       | 1                       | 7                     | 50              | colorless | clear   |
|           |                                      |       |              |           |           | 7±1       | 0                       | 1                       | 6                     | 55              | colorless | clear   |
|           |                                      |       |              |           |           | 14±2      | 0                       | 0                       | 5                     | 53              | colorless | clear   |
|           |                                      |       |              |           |           | 28±3      | 0                       | 90                      | 9                     | 48              | colorless | clear   |
|           |                                      |       |              |           |           | 60±3      | 4                       | 1750                    | 10                    | 44              | colorless | clear   |
|           |                                      |       |              |           |           | 90 ±4     | 0                       | 1                       | 7                     | 52              | colorless | clear   |
|           |                                      |       |              |           |           | 120±4     | 0                       | 0                       | 20                    | 59              | colorless | clear   |
|           |                                      |       |              |           |           | 150±4     | 1                       | 0                       | 80                    | 52              | colorless | clear   |
|           |                                      |       |              | 180±5     | 0         | 0         | 16                      | 48                      | colorless             | clear           |           |         |
|           |                                      |       |              | 0         | 2         | 550       | 7                       | 56                      | colorless             | clear           |           |         |
|           |                                      |       |              | 7±1       | 0         | 0         | 4                       | 64                      | colorless             | clear           |           |         |
|           |                                      |       |              | 14±2      | 1         | 10        | 7                       | 58                      | colorless             | clear           |           |         |
|           |                                      |       |              | 28±3      | 4         | 10        | 8                       | 55                      | colorless             | clear           |           |         |
|           |                                      |       |              | 60±3      | 1         | 20        | 9                       | 33                      | colorless             | clear           |           |         |
|           | 90 ±4                                | 0     | 20           | 5         | 34        | colorless | clear                   |                         |                       |                 |           |         |
|           | 120±4                                | 0     | 10           | 7         | 70        | colorless | clear                   |                         |                       |                 |           |         |
|           | 150±4                                | 1     | 0            | 9         | 61        | colorless | clear                   |                         |                       |                 |           |         |
|           | 180±5                                | 18    | 12500        | 86        | 80        | light red | cloudy                  |                         |                       |                 |           |         |
|           | 0                                    | 4     | 10           | 17        | 58        | colorless | cloudy                  |                         |                       |                 |           |         |
|           | 7±1                                  | 1     | 0            | 9         | 62        | colorless | clear                   |                         |                       |                 |           |         |
|           | 14±2                                 | 0     | 0            | 8         | 64        | colorless | clear                   |                         |                       |                 |           |         |
|           | 28±3                                 | 1     | 10           | 7         | 50        | colorless | clear                   |                         |                       |                 |           |         |
|           | 60±3                                 | 1     | 10           | 9         | 45        | colorless | clear                   |                         |                       |                 |           |         |
|           | 90 ±4                                | 0     | 30           | 8         | 60        | colorless | clear                   |                         |                       |                 |           |         |
|           | 120±4                                | 2     | 10           | 10        | 53        | colorless | clear                   |                         |                       |                 |           |         |
|           | 150±4                                | 1     | 100          | 9         | 57        | colorless | clear                   |                         |                       |                 |           |         |
|           | 180±5                                | 63    | 22500        | 172       | 67        | light red | cloudy                  |                         |                       |                 |           |         |
|           | 0                                    | 0     | 0            | 6         | 49        | colorless | clear                   |                         |                       |                 |           |         |
| 7±1       | 0                                    | 10    | 9            | 57        | colorless | clear     |                         |                         |                       |                 |           |         |
| 14±2      | 0                                    | 0     | 7            | 58        | colorless | clear     |                         |                         |                       |                 |           |         |
| 28±3      | 1                                    | 0     | 10           | 50        | colorless | clear     |                         |                         |                       |                 |           |         |
| 60±3      | 0                                    | 1     | 6            | 50        | colorless | clear     |                         |                         |                       |                 |           |         |
| 90 ±4     | 0                                    | 1     | 7            | 50        | colorless | clear     |                         |                         |                       |                 |           |         |

| Treatment   | Dose (GC/Animal)                    | Group | Necropsy Day | Animal ID   | Sex       | Study Day   | WBC Count (per $\mu$ L) | RBC Count (per $\mu$ L) | Total Protein (mg/dL) | Glucose (mg/dL) | Color     | Clarity |
|-------------|-------------------------------------|-------|--------------|-------------|-----------|-------------|-------------------------|-------------------------|-----------------------|-----------------|-----------|---------|
| GTP-206     | $4.5 \times 10^{13}$<br>(High Dose) | 4     | 90 $\pm$ 4   | 18-166      | M         | 0           | 1                       | 160                     | 7                     | 73              | colorless | clear   |
|             |                                     |       |              |             |           | 7 $\pm$ 1   | 0                       | 0                       | 5                     | 54              | colorless | clear   |
|             |                                     |       |              |             |           | 14 $\pm$ 2  | 0                       | 0                       | 6                     | 48              | colorless | clear   |
|             |                                     |       |              |             |           | 28 $\pm$ 3  | 1                       | 0                       | 7                     | 57              | colorless | clear   |
|             |                                     |       |              |             |           | 60 $\pm$ 3  | 0                       | 0                       | 7                     | 53              | colorless | clear   |
|             |                                     |       |              |             |           | 90 $\pm$ 4  | 0                       | 0                       | 9                     | 57              | colorless | clear   |
|             |                                     |       |              | 18-185      | F         | 0           | 1                       | 1                       | 7                     | 47              | colorless | clear   |
|             |                                     |       |              |             |           | 7 $\pm$ 1   | 2                       | 0                       | 6                     | 50              | colorless | clear   |
|             |                                     |       |              |             |           | 14 $\pm$ 2  | 1                       | 20                      | 7                     | 54              | colorless | clear   |
|             |                                     |       |              |             |           | 28 $\pm$ 3  | 5                       | 10                      | 8                     | 45              | colorless | clear   |
|             |                                     |       |              |             |           | 60 $\pm$ 3  | 2                       | 1                       | 9                     | 47              | colorless | clear   |
|             |                                     |       |              |             |           | 90 $\pm$ 4  | 0                       | 40                      | 8                     | 51              | colorless | clear   |
|             |                                     | 8     | 180 $\pm$ 5  | 18-038      | F         | 0           | 1                       | 10                      | 5                     | 47              | colorless | clear   |
|             |                                     |       |              |             |           | 7 $\pm$ 1   | 1                       | 0                       | 6                     | 55              | colorless | clear   |
|             |                                     |       |              |             |           | 14 $\pm$ 2  | 22                      | 30                      | 8                     | 57              | colorless | clear   |
|             |                                     |       |              |             |           | 28 $\pm$ 3  | 0                       | 0                       | 11                    | 73              | colorless | clear   |
|             |                                     |       |              |             |           | 60 $\pm$ 3  | 4                       | 10                      | 26                    | 61              | colorless | clear   |
|             |                                     |       |              |             |           | 90 $\pm$ 4  | 0                       | 20                      | 21                    | 58              | colorless | clear   |
|             |                                     |       |              |             |           | 120 $\pm$ 4 | 1                       | 10                      | 9                     | 61              | colorless | clear   |
|             |                                     |       |              |             |           | 150 $\pm$ 4 | 1                       | 0                       | 11                    | 52              | colorless | clear   |
|             |                                     |       |              | 180 $\pm$ 5 | 1         | 10          | 10                      | 59                      | colorless             | clear           |           |         |
|             |                                     |       |              | 18-158      | F         | 0           | 1                       | 0                       | 9                     | 43              | colorless | clear   |
|             |                                     |       |              |             |           | 7 $\pm$ 1   | 1                       | 0                       | 10                    | 50              | colorless | clear   |
|             |                                     |       |              |             |           | 14 $\pm$ 2  | 20                      | 50                      | 13                    | 56              | colorless | clear   |
| 28 $\pm$ 3  | 7                                   | 10    | 13           |             |           | 60          | colorless               | clear                   |                       |                 |           |         |
| 60 $\pm$ 3  | 9                                   | 10    | 18           | 45          | colorless | clear       |                         |                         |                       |                 |           |         |
| 90 $\pm$ 4  | 0                                   | 10    | 11           | 57          | colorless | clear       |                         |                         |                       |                 |           |         |
| 120 $\pm$ 4 | 1                                   | 3     | 10           | 53          | colorless | clear       |                         |                         |                       |                 |           |         |
| 150 $\pm$ 4 | 1                                   | 0     | 12           | 52          | colorless | clear       |                         |                         |                       |                 |           |         |
| 180 $\pm$ 5 | 0                                   | 1     | 12           | 67          | colorless | clear       |                         |                         |                       |                 |           |         |

| Treatment | Dose (GC/Animal)                      | Group | Necropsy Day | Animal ID | Sex | Study Day | WBC Count (per $\mu$ L) | RBC Count (per $\mu$ L) | Total Protein (mg/dL) | Glucose (mg/dL) | Color     | Clarity         |
|-----------|---------------------------------------|-------|--------------|-----------|-----|-----------|-------------------------|-------------------------|-----------------------|-----------------|-----------|-----------------|
| GTP-206   | 4.5 x 10 <sup>13</sup><br>(High Dose) | 8     | 180±5        | 18-170    | M   | 0         | 0                       | 2                       | 8                     | 59              | colorless | clear           |
|           |                                       |       |              |           |     | 7±1       | 0                       | 1                       | 9                     | 49              | colorless | clear           |
|           |                                       |       |              |           |     | 14±2      | 0                       | 0                       | 9                     | 47              | colorless | clear           |
|           |                                       |       |              |           |     | 28±3      | 1                       | 120                     | 13                    | 34              | colorless | clear           |
|           |                                       |       |              |           |     | 60±3      | 1                       | 10                      | 9                     | 35              | colorless | clear           |
|           |                                       |       |              |           |     | 90 ±4     | 1                       | 10                      | 11                    | 47              | colorless | clear           |
|           |                                       |       |              |           |     | 120±4     | 0                       | 0                       | 9                     | 55              | colorless | clear           |
|           |                                       |       |              |           |     | 150±4     | 8                       | 11750                   | 31                    | 61              | colorless | slightly cloudy |
|           |                                       |       |              |           |     | 180±5     | 1                       | 290                     | 12                    | 55              | colorless | clear           |

<sup>a</sup>Animal 18-168 exhibited neutrophilic pleocytosis on Day 14±2.

<sup>b</sup>Animal 18-168 exhibited excessive cytolysis on Day 28±3.

*Abbreviations:* CSF, cerebrospinal fluid; F, female; GC, genome copies; ID, identification number; ITFFB, intrathecal final formulation buffer; M, male; N/A, not applicable; RBC, red blood cell; WBC, white blood cell.
